# Supplementary material for: Intrinsic heterogeneity of mossy cells mediates the differential crosstalk between the dorsal and ventral hippocampus
Source: Research Square preprint supplement (doi:10.21203/rs.3.rs-92512/v1), 2020-10-26
Supplement: Supplementary file 1 [file 4b03a655f9c821dd59318900.xlsx]

## Sheet: 1_Axon guidance
No	Symbol	Description	Log2(FoldChange)	pValue
1	Lmx1A	LIM homeobox transcription factor 1 alpha	1.35636	8.28568e-06
2	Ephb1	Eph receptor B1	1.27939	0.0052727
3	Efnb1	ephrin B1	1.22899	0.00185187
4	Gli3	GLI-Kruppel family member GLI3	1.19656	0.000613995
5	Pax6	paired box 6	1.16987	0.00108244
6	Sema5A	sema domain, seven thrombospondin repeats (type 1 and type 1-like), transmembrane domain (TM) and short cytoplasmic domain, (semaphorin) 5A	1.14128	1.00066e-17
7	Efnb3	ephrin B3	0.947541	6.07921e-07
8	Epha4	Eph receptor A4	0.868167	3.19714e-15
9	Plxna4	plexin A4	0.858374	3.70595e-12
10	Matn2	matrilin 2	0.836446	1.34669e-05
11	Robo3	roundabout guidance receptor 3	0.755316	0.0302349
12	Epha5	Eph receptor A5	0.695638	5.13869e-08
13	Gap43	growth associated protein 43	-0.692176	1.3006e-06
14	Apbb1	amyloid beta (A4) precursor protein-binding, family B, member 1	-0.718271	0.00164114
15	Tubb3	tubulin, beta 3 class III	-0.776521	6.35362e-06
16	Efna1	ephrin A1	-1.03223	0.0181076
17	Fezf2	Fez family zinc finger 2	-1.04062	1.31925e-06
18	Lama1	laminin, alpha 1	-1.10637	0.00389111
19	Efnb2	ephrin B2	-1.15344	2.38478e-07
20	Flot1	flotillin 1	-1.15993	0.000108183
21	Nfasc	neurofascin	0.626002	0.000362504
22	Zfp280D	zinc finger protein 280D	0.621765	1.7769e-05
23	Ncan	neurocan	0.608106	1.32233e-05
24	Neo1	neogenin	0.589622	0.00641718
25	Flrt2	fibronectin leucine rich transmembrane protein 2	0.582408	0.000526322
26	Crmp1	collapsin response mediator protein 1	-0.61743	0.000137592

## Sheet: 2_Cell Adhesion
No	Symbol	Description	Log2(FoldChange)	pValue
1	Sgcd	sarcoglycan, delta (dystrophin-associated glycoprotein)	2.59643	6.36758e-11
2	Slitrk6	SLIT and NTRK-like family, member 6	1.78598	2.97708e-06
3	Il1r1	interleukin 1 receptor, type I	1.74625	1.88278e-05
4	Lrtm1	leucine-rich repeats and transmembrane domains 1	1.70335	0.000259807
5	Ntn4	netrin 4	1.66908	5.42221e-07
6	Gp1ba	glycoprotein 1b, alpha polypeptide	1.55022	5.65519e-05
7	Pcdhb10	protocadherin beta 10	1.45977	0.000504111
8	Pcdhga2	protocadherin gamma subfamily A, 2	1.34847	0.000816814
9	Ephb1	Eph receptor B1	1.27939	0.000976043
10	Pcdh15	protocadherin 15	1.27193	9.50929e-06
11	Pcdhgb7	protocadherin gamma subfamily B, 7	1.24235	0.000280539
12	Efnb1	ephrin B1	1.22899	0.000274926
13	Epha7	Eph receptor A7	1.2176	1.16334e-29
14	Tlr4	toll-like receptor 4	1.17145	0.00132883
15	Ctnnal1	catenin (cadherin associated protein), alpha-like 1	1.15884	0.000271028
16	Ptk7	PTK7 protein tyrosine kinase 7	1.15479	6.10628e-06
17	Efnb2	ephrin B2	-1.15344	6.62676e-09
18	Gp5	glycoprotein 5 (platelet)	-1.2135	4.13592e-05
19	Pcdha2	protocadherin alpha 2	-1.29903	1.67607e-05
20	Lilra5	leukocyte immunoglobulin-like receptor, subfamily A (with TM domain), member 5	-1.76817	0.0158156
21	Sema5a	sema domain, seven thrombospondin repeats (type 1 and type 1-like), transmembrane domain (TM) and short cytoplasmic domain, (semaphorin) 5A	1.14128	2.38168e-20
22	Epha10	Eph receptor A10	1.13236	0.000815478
23	Fat3	FAT atypical cadherin 3	1.11745	2.60694e-12
24	Pcdhb6	protocadherin beta 6	1.11383	0.00586788
25	Pcdhgb4	protocadherin gamma subfamily B, 4	1.11284	0.000224582
26	Fgfr2	fibroblast growth factor receptor 2	1.11034	1.61105e-09
27	Ptgfrn	prostaglandin F2 receptor negative regulator	1.10627	0.00184191
28	Pkd1	polycystin 1, transient receptor poteintial channel interacting	1.08203	0.000296523
29	C1ql1	complement component 1, q subcomponent-like 1	1.06771	0.00378423
30	Lrig1	leucine-rich repeats and immunoglobulin-like domains 1	1.01896	0.00133467
31	Jam2	junction adhesion molecule 2	1.00861	4.07773e-06
32	Lgr4	leucine-rich repeat-containing G protein-coupled receptor 4	0.993178	0.000276974
33	Pcdhb7	protocadherin beta 7	0.988991	0.0135173
34	Pcdh20	protocadherin 20	0.985816	1.36827e-13
35	Sdc4	syndecan 4	0.97946	1.42678e-05
36	Cadm2	cell adhesion molecule 2	0.974558	1.61282e-13
37	Fstl4	follistatin-like 4	0.968777	4.60429e-06
38	Cttnbp2	cortactin binding protein 2	0.964845	1.10084e-13
39	Efnb3	ephrin B3	0.947541	1.97882e-08
40	Ptprj	protein tyrosine phosphatase, receptor type, J	0.932387	2.64584e-12
41	Pcdhb9	protocadherin beta 9	0.926945	0.0127081
42	Pcdhgb6	protocadherin gamma subfamily B, 6	0.925486	0.00155854
43	Lrrc56	leucine rich repeat containing 56	0.912874	0.00213132
44	Pcdhb17	protocadherin beta 17	0.908284	0.000600608
45	Lrrtm4	leucine rich repeat transmembrane neuronal 4	0.894695	2.4835e-07
46	Epha4	Eph receptor A4	0.868167	1.2746e-17
47	Plxna4	plexin A4	0.858374	2.4036e-14
48	Cdh11	cadherin 11	0.842108	3.1966e-08
49	Epha6	Eph receptor A6	0.840963	1.30301e-13
50	Ptpn5	protein tyrosine phosphatase, non-receptor type 5	0.83823	3.51915e-06
51	Mcam	melanoma cell adhesion molecule	0.82518	0.00188392
52	Cdh8	cadherin 8	0.820179	0.000263693
53	Tspan5	tetraspanin 5	0.813084	4.38192e-11
54	Sema3e	sema domain, immunoglobulin domain (Ig), short basic domain, secreted, (semaphorin) 3E	0.806569	0.0010709
55	Tlr3	toll-like receptor 3	0.795914	0.00358021
56	Lrrc9	leucine rich repeat containing 9	0.794022	0.00219785
57	Pcdh17	protocadherin 17	0.759037	1.25743e-06
58	Robo3	roundabout guidance receptor 3	0.755316	0.0085347
59	Hepacam	hepatocyte cell adhesion molecule	0.75034	0.00142493
60	Cntnap5b	contactin associated protein-like 5B	0.745105	0.0054479
61	Sema4d	sema domain, immunoglobulin domain (Ig), transmembrane domain (TM) and short cytoplasmic domain, (semaphorin) 4D	0.742552	0.00236881
62	Amigo3	adhesion molecule with Ig like domain 3	0.741499	0.000139907
63	Lgr6	leucine-rich repeat-containing G protein-coupled receptor 6	0.738685	0.0146627
64	Lrrc55	leucine rich repeat containing 55	0.718639	0.00116597
65	Slitrk5	SLIT and NTRK-like family, member 5	0.707239	0.000196816
66	Epha5	Eph receptor A5	0.695638	1.13745e-09
67	Dscam	DS cell adhesion molecule	0.679019	3.29138e-06
68	Epha3	Eph receptor A3	0.67794	0.00450104
69	Nptx1	neuronal pentraxin 1	0.670277	1.32142e-09
70	Pcdhb16	protocadherin beta 16	0.655489	0.0138334
71	Fat4	FAT atypical cadherin 4	0.651498	0.000733765
72	Nfasc	neurofascin	0.626002	3.8567e-05
73	Mfap3	microfibrillar-associated protein 3	0.62316	0.00203619
74	Celsr3	cadherin, EGF LAG seven-pass G-type receptor 3	0.606318	0.0131647
75	Nlgn1	neuroligin 1	0.596125	2.31341e-06
76	Slitrk2	SLIT and NTRK-like family, member 2	0.591403	0.00351554
77	Mdga2	MAM domain containing glycosylphosphatidylinositol anchor 2	0.590656	1.19053e-05
78	Neo1	neogenin	0.589622	0.00123439
79	Flrt2	fibronectin leucine rich transmembrane protein 2	0.582408	6.08812e-05
80	Ctnnb1	catenin (cadherin associated protein), beta 1	-0.607585	0.000758183
81	Pcdhgc4	protocadherin gamma subfamily C, 4	-0.632883	0.0145064
82	Fat2	FAT atypical cadherin 2	-0.649131	0.00643613
83	Cttn	cortactin	-0.674076	0.000121847
84	Pcdhb2	protocadherin beta 2	-0.790535	0.00573735
85	Hepacam2	HEPACAM family member 2	-0.794218	0.00510006
86	Pcdhga4	protocadherin gamma subfamily A, 4	-0.931741	0.000536472
87	Efna1	ephrin A1	-1.03223	0.00448866
88	Kit	KIT proto-oncogene receptor tyrosine kinase	-1.03564	2.18489e-07
89	Pcdh11x	protocadherin 11 X-linked	-1.0403	0.00606358
90	Vstm2b	V-set and transmembrane domain containing 2B	-1.06285	2.71196e-09
91	Ephb6	Eph receptor B6	-1.07001	0.000889732
92	Igsf10	immunoglobulin superfamily, member 10	-1.13077	0.00484739

## Sheet: 3_Synaptic assembly
No	Symbol	Description	Log2(FoldChange)	pValue
1	Slitrk6	SLIT and NTRK-like family, member 6	1.78598	4.33184e-05
2	Grid2	glutamate receptor, ionotropic, delta 2	1.75802	1.34349e-06
3	Ephb1	Eph receptor B1	1.27939	0.0052727
4	Epha7	Eph receptor A7	1.2176	2.44389e-26
5	Cacna1a	calcium channel, voltage-dependent, P/Q type, alpha 1A subunit	1.14088	9.00971e-09
6	Shank1	SH3 and multiple ankyrin repeat domains 1	0.945946	5.65644e-08
7	Syndig1	synapse differentiation inducing 1	0.916116	0.00134045
8	Adgrb3	adhesion G protein-coupled receptor B3	0.881364	7.56557e-09
9	Agrn	agrin	0.855875	0.000336364
10	Shank3	SH3 and multiple ankyrin repeat domains 3	0.852965	0.0011458
11	Pcdh17	protocadherin 17	0.759037	2.05968e-05
12	Gabrb3	gamma-aminobutyric acid (GABA) A receptor, subunit beta 3	0.712945	2.24927e-09
13	Nrg3	neuregulin 3	0.708872	0.000416354
14	Slitrk5	SLIT and NTRK-like family, member 5	0.707239	0.0013992
15	Gap43	growth associated protein 43	-0.692176	1.3006e-06
16	Dbnl	drebrin-like	-0.752996	0.00718587
17	Cux2	cut-like homeobox 2	-0.765763	0.000549203
18	Mef2c	myocyte enhancer factor 2C	-0.8434	1.09976e-07
19	Efnb2	ephrin B2	-1.15344	2.38478e-07
20	Vstm5	V-set and transmembrane domain containing 5	-1.50614	3.09612e-05
21	Dscam	DS cell adhesion molecule	0.679019	4.73587e-05
22	Nptx1	neuronal pentraxin 1	0.670277	5.84417e-08
23	Myo6	myosin VI	0.660265	0.00222474
24	Pcdhb16	protocadherin beta 16	0.655489	0.0443756
25	Gabra2	gamma-aminobutyric acid (GABA) A receptor, subunit alpha 2	0.647233	1.34349e-06
26	Prkca	protein kinase C, alpha	0.620934	1.37742e-06
27	Nlgn1	neuroligin 1	0.596125	3.4576e-05
28	Pclo	piccolo (presynaptic cytomatrix protein)	0.596046	2.32007e-06
29	Slitrk2	SLIT and NTRK-like family, member 2	0.591403	0.0148784
30	Mdga2	MAM domain containing glycosylphosphatidylinositol anchor 2	0.590656	0.000138752
31	Flrt2	fibronectin leucine rich transmembrane protein 2	0.582408	0.000526322
32	Slitrk3	SLIT and NTRK-like family, member 3	0.554602	0.00361065
33	Dnm3	dynamin 3	-0.599528	9.70196e-06
34	Dlg5	discs large MAGUK scaffold protein 5	-0.624554	0.00592578
35	Cdk5	cyclin-dependent kinase 5	-0.637327	0.000251417

## Sheet: 4_Neuroactive ligand
No	Symbol	Description	Log2(FoldChange)	pValue
1	Adra2b	adrenergic receptor, alpha 2b	1.64174	6.42851e-05
2	Drd5	dopamine receptor D5	1.5212	0.000122648
3	Adra2a	adrenergic receptor, alpha 2a	1.30616	2.83071e-05
4	Gabrg1	gamma-aminobutyric acid (GABA) A receptor, subunit gamma 1	1.21496	0.00137573
5	Grin2a	glutamate receptor, ionotropic, NMDA2A (epsilon 1)	1.12383	2.49969e-25
6	Gabrg3	gamma-aminobutyric acid (GABA) A receptor, subunit gamma 3	1.11759	1.10546e-07
7	Grin2b	glutamate receptor, ionotropic, NMDA2B (epsilon 2)	1.00705	4.37813e-22
8	Mtnr1a	melatonin receptor 1A	0.988562	0.000441876
9	Grm5	glutamate receptor, metabotropic 5	0.944849	6.44e-10
10	Htr4	5 hydroxytryptamine (serotonin) receptor 4	0.903006	0.0161943
11	Adrb1	adrenergic receptor, beta 1	0.891848	0.0150015
12	Grm8	glutamate receptor, metabotropic 8	0.836374	0.0111252
13	Gria2	glutamate receptor, ionotropic, AMPA2 (alpha 2)	0.811914	9.84272e-11
14	Gabrb1	gamma-aminobutyric acid (GABA) A receptor, subunit beta 1	0.801299	5.22479e-11
15	Chrne	cholinergic receptor, nicotinic, epsilon polypeptide	0.776508	0.000748881
16	Htr1d	5-hydroxytryptamine (serotonin) receptor 1D	0.772225	2.536e-05
17	Gabra5	gamma-aminobutyric acid (GABA) A receptor, subunit alpha 5	0.746797	5.0036e-09
18	Gabra3	gamma-aminobutyric acid (GABA) A receptor, subunit alpha 3	-0.84565	1.36595e-05
19	Grik1	glutamate receptor, ionotropic, kainate 1	-0.882026	0.00241215
20	Chrna4	cholinergic receptor, nicotinic, alpha polypeptide 4	-0.913563	0.00157576
21	Gabrb3	gamma-aminobutyric acid (GABA) A receptor, subunit beta 3	0.712945	2.24927e-09
22	Gria3	glutamate receptor, ionotropic, AMPA3 (alpha 3)	0.696896	2.67991e-08
23	Chrm1	cholinergic receptor, muscarinic 1, CNS	0.694538	0.000994134
24	Grin2c	glutamate receptor, ionotropic, NMDA2C (epsilon 3)	0.688304	0.0362824
25	Gabra2	gamma-aminobutyric acid (GABA) A receptor, subunit alpha 2	0.647233	1.34349e-06
26	Gria1	glutamate receptor, ionotropic, AMPA1 (alpha 1)	0.607331	1.53721e-07
27	Oprl1	opioid receptor-like 1	-0.627536	0.0458769
28	Grin3a	glutamate receptor ionotropic, NMDA3A	-0.654658	0.0186022

## Sheet: 5_Ion channles
No	Symbol	Description	Log2(FoldChange)	pValue
1	Ano1	anoctamin 1, calcium activated chloride channel	2.55015	1.79427e-16
2	Ano2	anoctamin 2	2.50362	0.000322933
3	Scn5a	sodium channel, voltage-gated, type V, alpha	1.99846	1.07526e-11
4	Kcnn3	potassium intermediate/small conductance calcium-activated channel, subfamily N, member 3	1.60595	2.78371e-15
5	Cacng5	calcium channel, voltage-dependent, gamma subunit 5	1.52993	1.1759e-09
6	Clic6	chloride intracellular channel 6	1.35443	0.000206181
7	Kcnj2	potassium inwardly-rectifying channel, subfamily J, member 2	1.23719	0.00321695
8	Gabrg1	gamma-aminobutyric acid (GABA) A receptor, subunit gamma 1	1.21496	0.00137573
9	Kcnh7	potassium voltage-gated channel, subfamily H (eag-related), member 7	1.18829	8.02496e-18
10	Cacna1d	calcium channel, voltage-dependent, L type, alpha 1D subunit	1.15893	8.94428e-08
11	Cacna1a	calcium channel, voltage-dependent, P/Q type, alpha 1A subunit	1.14088	9.00971e-09
12	Cacng4	calcium channel, voltage-dependent, gamma subunit 4	1.13157	0.000247317
13	Cacna1e	calcium channel, voltage-dependent, R type, alpha 1E subunit	1.12583	2.06198e-24
14	Gabrg3	gamma-aminobutyric acid (GABA) A receptor, subunit gamma 3	1.11759	1.10546e-07
15	Kcnj6	potassium inwardly-rectifying channel, subfamily J, member 6	1.04817	3.3406e-05
16	Scn3b	sodium channel, voltage-gated, type III, beta	1.01143	2.25819e-14
17	Kcnk9	potassium channel, subfamily K, member 9	0.975036	4.75435e-09
18	Kcnj9	potassium inwardly-rectifying channel, subfamily J, member 9	-0.921059	8.3209e-06
19	Kcnc4	potassium voltage gated channel, Shaw-related subfamily, member 4	-1.07093	0.000224043
20	Kcnq4	potassium voltage-gated channel, subfamily Q, member 4	-1.07804	0.00441548
21	Kcnj3	potassium inwardly-rectifying channel, subfamily J, member 3	0.915597	2.79503e-08
22	Kcna1	potassium voltage-gated channel, shaker-related subfamily, member 1	0.912096	2.36722e-06
23	Kcnj10	potassium inwardly-rectifying channel, subfamily J, member 10	0.908812	0.000178288
24	Cacng8	calcium channel, voltage-dependent, gamma subunit 8	0.890154	0.0176141
25	Kcnk6	potassium inwardly-rectifying channel, subfamily K, member 6	0.834071	0.0314162
26	Gabrb1	gamma-aminobutyric acid (GABA) A receptor, subunit beta 1	0.801299	5.22479e-11
27	Kcnt2	potassium channel, subfamily T, member 2	0.795155	7.8282e-06
28	Scn4b	sodium channel, type IV, beta	0.787104	0.0406785
29	Kcnd2	potassium voltage-gated channel, Shal-related family, member 2	0.781553	1.82436e-08
30	Kcnc3	potassium voltage gated channel, Shaw-related subfamily, member 3	0.766935	0.00384999
31	Gabra5	gamma-aminobutyric acid (GABA) A receptor, subunit alpha 5	0.746797	5.0036e-09
32	Gabrb3	gamma-aminobutyric acid (GABA) A receptor, subunit beta 3	0.712945	2.24927e-09
33	Kcnk2	potassium channel, subfamily K, member 2	0.698776	0.00177929
34	Cacna2d2	calcium channel, voltage-dependent, alpha 2/delta subunit 2	0.683562	0.000440375
35	Cftr	cystic fibrosis transmembrane conductance regulator	0.667262	0.0190043
36	Gabra2	gamma-aminobutyric acid (GABA) A receptor, subunit alpha 2	0.647233	1.34349e-06
37	Kcnb1	potassium voltage gated channel, Shab-related subfamily, member 1	0.624081	0.000238798
38	Kcnn2	potassium intermediate/small conductance calcium-activated channel, subfamily N, member 2	0.620682	0.00753738
39	Kcnq2	potassium voltage-gated channel, subfamily Q, member 2	0.614655	4.2074e-07
40	Cacna1i	calcium channel, voltage-dependent, alpha 1I subunit	-0.65289	0.0239796
41	Kcna6	potassium voltage-gated channel, shaker-related, subfamily, member 6	-0.708401	0.000196631
42	Gabra3	gamma-aminobutyric acid (GABA) A receptor, subunit alpha 3	-0.84565	1.36595e-05

## Sheet: 6_Glucose metabolism
No	Symbol	Description	Log2(FoldChange)	pValue
1	Tfap2B	transcription factor AP-2 beta	1.81694	4.17358e-07
2	Fbn1	fibrillin 1	1.72738	2.91911e-09
3	Pgm5	phosphoglucomutase 5	1.72408	2.78896e-05
4	Cacna1A	calcium channel, voltage-dependent, P/Q type, alpha 1A subunit	1.14088	9.00971e-09
5	Cpt1A	carnitine palmitoyltransferase 1a, liver	0.939373	0.000868706
6	Npy1R	neuropeptide Y receptor Y1	-0.598638	0.000242039
7	Crem	cAMP responsive element modulator	-0.599451	0.0237162
8	Pdha1	pyruvate dehydrogenase E1 alpha 1	-0.622518	0.00107019
9	Gpi1	glucose-6-phosphate isomerase 1	-0.643217	0.000125786
10	Pkm	pyruvate kinase, muscle	-0.644014	1.47319e-05
11	Pgk1	phosphoglycerate kinase 1	-0.73516	0.000211702
12	Tpi1	triosephosphate isomerase 1	-0.746556	1.10546e-07
13	Gapdh	glyceraldehyde-3-phosphate dehydrogenase	-0.80824	1.00119e-05
14	Pgm2	phosphoglucomutase 2	-0.831538	0.0430645
15	Pgam1	phosphoglycerate mutase 1	-0.868358	1.04723e-07
16	Fabp5	fatty acid binding protein 5, epidermal	-0.918307	3.69345e-09
17	Crtc2	CREB regulated transcription coactivator 2	-0.987477	0.0461097
18	Rbp4	retinol binding protein 4, plasma	-1.04206	0.0258266
19	Ganc	glucosidase, alpha; neutral C	-1.77145	0.000154862

## Sheet: 7_Fatty acid metabolism
No	Symbol	Description	Log2(FoldChange)	pValue
1	Ghr	growth hormone receptor	1.83109	9.58876e-12
2	Ptges	prostaglandin E synthase	1.77399	7.77565e-05
3	Scd1	stearoyl-Coenzyme A desaturase 1	1.30752	2.40997e-08
4	Cpt1A	carnitine palmitoyltransferase 1a, liver	0.939373	0.000868706
5	Tbxas1	thromboxane A synthase 1, platelet	0.868597	0.00642427
6	Alox12	arachidonate 12-lipoxygenase	0.767186	0.00016372
7	Aasdh	aminoadipate-semialdehyde dehydrogenase	-0.756826	0.0119386
8	Decr2	2-4-dienoyl-Coenzyme A reductase 2, peroxisomal	-0.778013	0.00532094
9	Aacs	acetoacetyl-CoA synthetase	-0.794947	0.00749929
10	Acox3	acyl-Coenzyme A oxidase 3, pristanoyl	-0.802575	0.000425665
11	Ndufab1	NADH:ubiquinone oxidoreductase subunit AB1	-0.810008	8.38939e-06
12	Crot	carnitine O-octanoyltransferase	-0.823006	0.000613012
13	Ndufs6	NADH:ubiquinone oxidoreductase core subunit S6	-0.827777	1.03448e-07
14	Stat5B	signal transducer and activator of transcription 5B	-0.928203	0.000627616
15	Lypla2	lysophospholipase 2	-0.950684	5.02297e-05
16	Lpin3	lipin 3	-0.981222	6.56501e-07
17	Acadm	acyl-Coenzyme A dehydrogenase, medium chain	-1.03604	1.49989e-05
18	Mlycd	malonyl-CoA decarboxylase	-1.16025	5.61524e-07
19	Cpt2	carnitine palmitoyltransferase 2	-1.62689	0.00204948
20	Aloxe3	arachidonate lipoxygenase 3	-1.96255	0.000149196
21	Crem	cAMP responsive element modulator	-0.599451	0.0237162
22	Cbr4	carbonyl reductase 4	-0.636424	0.0244627
23	Fasn	fatty acid synthase	-0.681679	0.00539275
24	Ptges2	prostaglandin E synthase 2	-0.702988	0.00250833
25	Decr1	2,4-dienoyl CoA reductase 1, mitochondrial	-0.713043	0.00478326
26	Hsd17B4	hydroxysteroid (17-beta) dehydrogenase 4	-0.719398	0.00596315
27	Alkbh7	alkB homolog 7	-0.726212	0.0124781

## Sheet: 8_oxidative stress
No	Symbol	Description	Log2(FoldChange)	pValue
1	Prkcd	protein kinase C, delta	2.26845	3.4553e-10
2	Tlr4	toll-like receptor 4	1.17145	0.00680033
3	Tat	tyrosine aminotransferase	1.03323	7.63986e-06
4	Txnip	thioredoxin interacting protein	0.902715	0.0403745
5	Aldh1A1	aldehyde dehydrogenase family 1, subfamily A1	0.845386	0.000886484
6	Abcc1	ATP-binding cassette, sub-family C (CFTR/MRP), member 1	0.843584	0.0254595
7	Gpx1	glutathione peroxidase 1	-0.679554	0.000281126
8	Ndufa12	NADH:ubiquinone oxidoreductase subunit A12	-0.684802	0.00016829
9	Prdx2	peroxiredoxin 2	-0.705025	2.17094e-08
10	Prdx5	peroxiredoxin 5	-0.73402	0.000224122
11	Txnrd1	thioredoxin reductase 1	-0.737836	1.48219e-05
12	Psmb5	proteasome (prosome, macropain) subunit, beta type 5	-0.750129	0.000473906
13	Pink1	PTEN induced putative kinase 1	-0.81291	7.9606e-09
14	Gpx3	glutathione peroxidase 3	-0.879489	0.000802065
15	Cygb	cytoglobin	-0.88437	1.85237e-05
16	Chrna4	cholinergic receptor, nicotinic, alpha polypeptide 4	-0.913563	0.00157576
17	Park7	Parkinson disease (autosomal recessive, early onset) 7	-0.942212	1.67609e-08
18	Alad	aminolevulinate, delta-, dehydratase	-1.20678	0.000937906
19	Ercc2	excision repair cross-complementing rodent repair deficiency, complementation group 2	-1.20771	0.00198482
20	Aifm1	apoptosis-inducing factor, mitochondrion-associated 1	-1.21221	1.96789e-05
21	Epas1	endothelial PAS domain protein 1	0.635651	0.0445412
22	Slc23A2	solute carrier family 23 (nucleobase transporters), member 2	0.626808	0.00183436
23	Atox1	antioxidant 1 copper chaperone	-0.600122	0.0186796
24	Ndufs2	NADH:ubiquinone oxidoreductase core subunit S2	-0.63993	0.00015045
25	Ndufs8	NADH:ubiquinone oxidoreductase core subunit S8	-0.652383	0.00405433
26	Egfr	epidermal growth factor receptor	-0.671007	0.0210219

## Sheet: 9_Proteasome
No	Symbol	Description	Log2(FoldChange)	pValue
1	Psmd13	proteasome (prosome, macropain) 26S subunit, non-ATPase, 13	-0.614751	0.0159985
2	Psmb7	proteasome (prosome, macropain) subunit, beta type 7	-0.635702	0.0416997
3	Psmd8	proteasome (prosome, macropain) 26S subunit, non-ATPase, 8	-0.67243	1.41425e-05
4	Psmb4	proteasome (prosome, macropain) subunit, beta type 4	-0.676465	9.66455e-08
5	Adrm1	adhesion regulating molecule 1	-0.685693	0.0179234
6	Psmd10	proteasome (prosome, macropain) 26S subunit, non-ATPase, 10	-0.706379	0.00277268
7	Psmb1	proteasome (prosome, macropain) subunit, beta type 1	-0.716857	3.58439e-07
8	Psmb5	proteasome (prosome, macropain) subunit, beta type 5	-0.750129	0.000473906
9	Psmd12	proteasome (prosome, macropain) 26S subunit, non-ATPase, 12	-0.776872	1.37273e-05
10	Psmc4	proteasome (prosome, macropain) 26S subunit, ATPase, 4	-0.778199	4.28214e-07
11	Psme1	proteasome (prosome, macropain) activator subunit 1 (PA28 alpha)	-0.778991	1.00745e-05
12	Psma2	proteasome subunit alpha 2	-0.794681	1.25105e-08
13	Psmb10	proteasome (prosome, macropain) subunit, beta type 10	-0.809798	0.00109752
14	Psme2	proteasome (prosome, macropain) activator subunit 2 (PA28 beta)	-0.814094	8.43634e-05
15	Psmb6	proteasome (prosome, macropain) subunit, beta type 6	-0.831052	1.28831e-08
16	Psma6	proteasome subunit alpha 6	-0.843761	4.37324e-08
17	Psma1	proteasome subunit alpha 1	-0.858623	1.31925e-06
18	Psmd9	proteasome (prosome, macropain) 26S subunit, non-ATPase, 9	-0.877457	2.69405e-06
19	Psmg3	proteasome (prosome, macropain) assembly chaperone 3	-0.937067	0.00292684
20	Psmb3	proteasome (prosome, macropain) subunit, beta type 3	-1.11856	1.36612e-08
21	Psmc3	proteasome (prosome, macropain) 26S subunit, ATPase 3	-0.586473	0.000262112
22	Psma5	proteasome subunit alpha 5	-0.601281	0.0100722

## Sheet: 10_Exocytosis
No	Symbol	Description	Log2(FoldChange)	pValue
1	Stxbp2	syntaxin binding protein 2	1.33979	0.0219955
2	Snx19	sorting nexin 19	1.16194	0.00701093
3	Syt7	synaptotagmin VII	1.00807	1.22057e-09
4	Pik3C2A	phosphatidylinositol-4-phosphate 3-kinase catalytic subunit type 2 alpha	0.846371	1.05533e-05
5	Kcnb1	potassium voltage gated channel, Shab-related subfamily, member 1	0.624081	0.000238798
6	Rab11A	RAB11A, member RAS oncogene family	-0.589119	0.000514027
7	Cdk5	cyclin-dependent kinase 5	-0.637327	0.000251417
8	Pdzd11	PDZ domain containing 11	-0.74637	0.00508284
9	Lin7B	lin-7 homolog B (C. elegans)	-0.822473	0.049522
10	Rab3A	RAB3A, member RAS oncogene family	-0.846551	1.07085e-08
11	Sytl5	synaptotagmin-like 5	-0.893663	0.0166541
12	Rims3	regulating synaptic membrane exocytosis 3	-0.908389	2.17886e-05
13	Hap1	huntingtin-associated protein 1	-0.909802	8.27047e-08
14	Unc13C	unc-13 homolog C	-1.03445	2.49212e-06
15	Syt17	synaptotagmin XVII	-1.21268	1.1685e-06
16	Cplx3	complexin 3	-1.2309	2.32007e-06
17	Stx1A	syntaxin 1A (brain)	-1.315	2.82939e-09
