# Supplementary material for: Intrinsic heterogeneity of mossy cells mediates the differential crosstalk between the dorsal and ventral hippocampus
Source: Research Square preprint supplement (doi:10.21203/rs.3.rs-92512/v1), 2020-10-26
Supplement: Supplementary file 2 [file 6bf4d0422d52479a808b3242.xlsx]

## Sheet: dMC
Ensemble_ID	Gene_Symbol	Gene_ID	Description	log2FC	p-value	FDR
ENSMUSG00000006219	Fblim1	74202	filamin binding LIM protein 1	5.18871	0.000369417	0.00235972
ENSMUSG00000046794	Ppp1r3b	244416	protein phosphatase 1, regulatory subunit 3B	3.52175	4.31409e-10	2.21045e-08
ENSMUSG00000061414	Cracr2a	381812	calcium release activated channel regulator 2A	3.03718	4.67004e-07	9.04579e-06
ENSMUSG00000041700	Lhfpl1	237091	lipoma HMGIC fusion partner-like 1	2.87014	4.89045e-05	0.000441876
ENSMUSG00000064310	Zpld1	239852	zona pellucida like domain containing 1	2.74065	1.62642e-07	3.67882e-06
ENSMUSG00000039349	C130074G19Rik	226777	RIKEN cDNA C130074G19 gene	2.67212	5.39664e-07	1.0202e-05
ENSMUSG00000020354	Sgcd	24052	sarcoglycan, delta (dystrophin-associated glycoprotein)	2.59643	6.36758e-11	4.26349e-09
ENSMUSG00000036972	Zic4	22774	zinc finger protein of the cerebellum 4	2.59527	2.63319e-05	0.000264674
ENSMUSG00000032368	Zic1	22771	zinc finger protein of the cerebellum 1	2.59303	1.86795e-09	7.98798e-08
ENSMUSG00000020123	Avpr1a	54140	arginine vasopressin receptor 1A	2.59022	7.60731e-11	4.93623e-09
ENSMUSG00000067860	Zic3	22773	zinc finger protein of the cerebellum 3	2.5656	7.72585e-09	2.73349e-07
ENSMUSG00000030342	Cd9	12527	CD9 antigen	2.56377	5.51512e-21	2.57464e-18
ENSMUSG00000031075	Ano1	101772	anoctamin 1, calcium activated chloride channel	2.55015	5.65848e-19	1.79427e-16
ENSMUSG00000038115	Ano2	243634	anoctamin 2	2.50362	3.35692e-05	0.000322933
ENSMUSG00000073910	Mob3b	214944	MOB kinase activator 3B	2.50102	4.78987e-15	8.04985e-13
ENSMUSG00000038805	Six3	20473	sine oculis-related homeobox 3	2.47716	5.75481e-05	0.000504514
ENSMUSG00000068114	Ccdc134	76457	coiled-coil domain containing 134	2.46413	3.93152e-16	7.7733e-14
ENSMUSG00000049036	Tmem121	69195	transmembrane protein 121	2.42548	0.0103108	0.0351323
ENSMUSG00000027661	Slc2a10	170441	solute carrier family 2 (facilitated glucose transporter), member 10	2.41329	5.33418e-07	1.00953e-05
ENSMUSG00000044813	Shb	230126	src homology 2 domain-containing transforming protein B	2.41211	1.10983e-06	1.85237e-05
ENSMUSG00000047686	Rtl3	213436	retrotransposon Gag like 3	2.38757	1.03727e-05	0.000123898
ENSMUSG00000035551	Igfbpl1	75426	insulin-like growth factor binding protein-like 1	2.38267	0.00331778	0.0142535
ENSMUSG00000045991	Onecut2	225631	one cut domain, family member 2	2.32819	1.32492e-09	5.84425e-08
ENSMUSG00000044165	Bcl2l15	229672	BCLl2-like 15	2.30127	2.61169e-15	4.57209e-13
ENSMUSG00000047773	Ankfn1	382543	ankyrin-repeat and fibronectin type III domain containing 1	2.29536	0.00126893	0.00655771
ENSMUSG00000080316	Spaca6	75202	sperm acrosome associated 6	2.29487	4.77383e-22	2.58803e-19
ENSMUSG00000039304	Tnfsf10	22035	tumor necrosis factor (ligand) superfamily, member 10	2.29223	2.3962e-16	4.91104e-14
ENSMUSG00000021948	Prkcd	18753	protein kinase C, delta	2.26845	3.83437e-12	3.4553e-10
ENSMUSG00000031200	Mtcp1	17763	mature T cell proliferation 1	2.26061	4.24872e-11	2.98761e-09
ENSMUSG00000031103	Elf4	56501	E74-like factor 4 (ets domain transcription factor)	2.25306	0.00205295	0.00970396
ENSMUSG00000044881	Coa4	68185	cytochrome c oxidase assembly factor 4	2.24764	0.005082	0.0199365
ENSMUSG00000045005	Fzd5	14367	frizzled class receptor 5	2.23233	1.12203e-15	2.02761e-13
ENSMUSG00000047591	Mafa	378435	v-maf musculoaponeurotic fibrosarcoma oncogene family, protein A (avian)	2.2317	6.28032e-20	2.34549e-17
ENSMUSG00000009376	Met	17295	met proto-oncogene	2.22752	2.0795e-05	0.000218972
ENSMUSG00000040274	Cdk6	12571	cyclin-dependent kinase 6	2.226	6.46862e-12	5.60369e-10
ENSMUSG00000032403	2300009A05Rik	69478	RIKEN cDNA 2300009A05 gene	2.21855	1.35444e-13	1.8357e-11
ENSMUSG00000025993	Slc40a1	53945	solute carrier family 40 (iron-regulated transporter), member 1	2.21724	4.47576e-07	8.76685e-06
ENSMUSG00000041703	Zic5	65100	zinc finger protein of the cerebellum 5	2.20361	1.82442e-08	5.72037e-07
ENSMUSG00000022969	Il10rb	16155	interleukin 10 receptor, beta	2.19846	3.83611e-10	2.0084e-08
ENSMUSG00000057265	Bbof1	72873	basal body orientation factor 1	2.16767	1.65164e-08	5.23725e-07
ENSMUSG00000048126	Col6a3	12835	collagen, type VI, alpha 3	2.16736	5.45937e-05	0.000482896
ENSMUSG00000061524	Zic2	22772	zinc finger protein of the cerebellum 2	2.15564	2.61127e-07	5.57188e-06
ENSMUSG00000039997	Ifi203	15950	interferon activated gene 203	2.15489	0.000722633	0.00410013
ENSMUSG00000028753	Vwa5b1	75718	von Willebrand factor A domain containing 5B1	2.15241	5.61813e-05	0.000494078
ENSMUSG00000027246	Ell3	269344	elongation factor RNA polymerase II-like 3	2.14973	1.06214e-06	1.7922e-05
ENSMUSG00000055541	Lair1	52855	leukocyte-associated Ig-like receptor 1	2.10605	2.67581e-10	1.46481e-08
ENSMUSG00000038872	Zfhx3	11906	zinc finger homeobox 3	2.10007	4.22921e-26	4.18094e-23
ENSMUSG00000054871	Tmem158	72309	transmembrane protein 158	2.09726	8.05529e-12	6.76886e-10
ENSMUSG00000041552	Ptchd1	211612	patched domain containing 1	2.09385	6.05385e-13	7.01861e-11
ENSMUSG00000073427	Gm4924	237412	predicted gene 4924	2.08364	1.2367e-11	1.00893e-09
ENSMUSG00000047230	Cldn2	12738	claudin 2	2.08317	4.13039e-06	5.72109e-05
ENSMUSG00000028871	Rspo1	192199	R-spondin 1	2.08235	0.000435028	0.00269285
ENSMUSG00000027896	Slc16a4	229699	solute carrier family 16 (monocarboxylic acid transporters), member 4	2.06134	8.61532e-09	3.01017e-07
ENSMUSG00000048721	Fndc9	320116	fibronectin type III domain containing 9	2.05943	5.94875e-06	7.73199e-05
ENSMUSG00000095115	Itpripl2	319622	inositol 1,4,5-triphosphate receptor interacting protein-like 2	2.05809	1.56426e-08	5.01698e-07
ENSMUSG00000008307	1700109H08Rik	77036	RIKEN cDNA 1700109H08 gene	2.03952	0.000607089	0.00355868
ENSMUSG00000020330	Hmmr	15366	hyaluronan mediated motility receptor (RHAMM)	2.02458	0.00128157	0.00660678
ENSMUSG00000046169	Adamts6	108154	a disintegrin-like and metallopeptidase (reprolysin type) with thrombospondin type 1 motif, 6	2.02138	1.99388e-05	0.000211815
ENSMUSG00000022070	Bora	77744	bora, aurora kinase A activator	2.02063	4.30877e-09	1.61998e-07
ENSMUSG00000021675	F2rl2	14064	coagulation factor II (thrombin) receptor-like 2	2.01299	1.11957e-07	2.67266e-06
ENSMUSG00000032511	Scn5a	20271	sodium channel, voltage-gated, type V, alpha	1.99846	7.48577e-14	1.07526e-11
ENSMUSG00000050558	Prokr2	246313	prokineticin receptor 2	1.99443	1.21499e-08	4.05946e-07
ENSMUSG00000046605	B3gntl1	210004	UDP-GlcNAc:betaGal beta-1,3-N-acetylglucosaminyltransferase-like 1	1.98771	0.00299065	0.0130956
ENSMUSG00000029917	Qrfprl	243407	pyroglutamylated RFamide peptide receptor like	1.9834	5.44007e-07	1.0243e-05
ENSMUSG00000027536	Chmp4c	66371	charged multivesicular body protein 4C	1.97146	2.1625e-07	4.74452e-06
ENSMUSG00000024871	Doc2g	60425	double C2, gamma	1.95817	1.14817e-13	1.60802e-11
ENSMUSG00000050808	Muc15	269328	mucin 15	1.95098	0.0001106	0.000862528
ENSMUSG00000026566	Mpzl1	68481	myelin protein zero-like 1	1.93194	4.01475e-13	4.88926e-11
ENSMUSG00000051504	Siglech	233274	sialic acid binding Ig-like lectin H	1.93071	9.96374e-13	1.0734e-10
ENSMUSG00000031283	Chrdl1	83453	chordin-like 1	1.92714	7.7772e-08	1.94499e-06
ENSMUSG00000029759	Pon3	269823	paraoxonase 3	1.92465	6.74604e-08	1.72301e-06
ENSMUSG00000037833	Sh2d4b	328381	SH2 domain containing 4B	1.91584	2.20071e-06	3.3052e-05
ENSMUSG00000030177	Ccdc77	67200	coiled-coil domain containing 77	1.90923	6.63249e-05	0.000566103
ENSMUSG00000049526	Tmem202	73893	transmembrane protein 202	1.89411	3.63646e-10	1.92184e-08
ENSMUSG00000024691	Fam111a	107373	family with sequence similarity 111, member A	1.89009	4.35557e-05	0.000401535
ENSMUSG00000037370	Enpp1	18605	ectonucleotide pyrophosphatase/phosphodiesterase 1	1.88519	0.00271961	0.0121655
ENSMUSG00000042258	Isl1	16392	ISL1 transcription factor, LIM/homeodomain	1.88285	0.00072352	0.00410377
ENSMUSG00000048647	Exd1	241624	exonuclease 3'-5' domain containing 1	1.86706	0.00202064	0.00958421
ENSMUSG00000062198	2700097O09Rik	72658	RIKEN cDNA 2700097O09 gene	1.84924	3.113e-07	6.50865e-06
ENSMUSG00000028749	Pla2g2f	26971	phospholipase A2, group IIF	1.84915	1.08883e-06	1.82805e-05
ENSMUSG00000026227	2810459M11Rik	72792	RIKEN cDNA 2810459M11 gene	1.84341	7.15353e-08	1.81331e-06
ENSMUSG00000034320	Slc26a2	13521	solute carrier family 26 (sulfate transporter), member 2	1.83768	1.08228e-08	3.69693e-07
ENSMUSG00000008496	Pou2f2	18987	POU domain, class 2, transcription factor 2	1.83682	3.72484e-09	1.44239e-07
ENSMUSG00000055737	Ghr	14600	growth hormone receptor	1.83109	6.50434e-14	9.58876e-12
ENSMUSG00000024055	Cyp4f13	170716	cytochrome P450, family 4, subfamily f, polypeptide 13	1.82862	1.21405e-08	4.05946e-07
ENSMUSG00000025927	Tfap2b	21419	transcription factor AP-2 beta	1.81694	1.25908e-08	4.17358e-07
ENSMUSG00000046186	Cd109	235505	CD109 antigen	1.81563	1.12059e-09	5.0899e-08
ENSMUSG00000050075	Gpr171	229323	G protein-coupled receptor 171	1.80683	3.37264e-07	6.95467e-06
ENSMUSG00000019842	Traf3ip2	103213	TRAF3 interacting protein 2	1.79107	1.98729e-09	8.34961e-08
ENSMUSG00000045871	Slitrk6	239250	SLIT and NTRK-like family, member 6	1.78598	2.97708e-06	4.33184e-05
ENSMUSG00000035067	Xkr6	219149	X-linked Kx blood group related 6	1.78229	1.54351e-12	1.58172e-10
ENSMUSG00000050737	Ptges	64292	prostaglandin E synthase	1.77399	5.99622e-06	7.77565e-05
ENSMUSG00000003418	St8sia6	241230	ST8 alpha-N-acetyl-neuraminide alpha-2,8-sialyltransferase 6	1.76751	1.08825e-17	2.81371e-15
ENSMUSG00000042708	Shcbp1l	71836	Shc SH2-domain binding protein 1-like	1.76459	6.09356e-07	1.12909e-05
ENSMUSG00000071424	Grid2	14804	glutamate receptor, ionotropic, delta 2	1.75802	4.9862e-08	1.34349e-06
ENSMUSG00000034206	Polq	77782	polymerase (DNA directed), theta	1.75056	7.9343e-06	9.81913e-05
ENSMUSG00000055415	Atp10b	319767	ATPase, class V, type 10B	1.74908	1.07696e-07	2.58932e-06
ENSMUSG00000026072	Il1r1	16177	interleukin 1 receptor, type I	1.74625	1.88278e-05	0.000202444
ENSMUSG00000018008	Cyth4	72318	cytohesin 4	1.73919	4.46344e-08	1.2237e-06
ENSMUSG00000005611	Mrvi1	17540	MRV integration site 1	1.73821	1.68295e-05	0.00018474
ENSMUSG00000073856	Iqck	434232	IQ motif containing K	1.7355	8.30278e-05	0.000680002
ENSMUSG00000020359	Phykpl	72947	5-phosphohydroxy-L-lysine phospholyase	1.73257	4.09174e-08	1.13288e-06
ENSMUSG00000006611	Hfe	15216	homeostatic iron regulator	1.7312	4.17703e-08	1.15459e-06
ENSMUSG00000027204	Fbn1	14118	fibrillin 1	1.72738	4.13392e-11	2.91911e-09
ENSMUSG00000057842	Zfp595	218314	zinc finger protein 595	1.72502	0.000130218	0.000988012
ENSMUSG00000041731	Pgm5	226041	phosphoglucomutase 5	1.72408	1.80554e-06	2.78896e-05
ENSMUSG00000025255	Zfhx4	80892	zinc finger homeodomain 4	1.71289	9.30475e-24	5.79169e-21
ENSMUSG00000056130	Ticam2	225471	toll-like receptor adaptor molecule 2	1.71148	0.000123248	0.000943221
ENSMUSG00000030344	Akap3	11642	A kinase (PRKA) anchor protein 3	1.70833	0.00436479	0.0176971
ENSMUSG00000045776	Lrtm1	319476	leucine-rich repeats and transmembrane domains 1	1.70335	0.000259807	0.00177565
ENSMUSG00000053205	Styx	56291	serine/threonine/tyrosine interaction protein	1.69917	1.64905e-08	5.23725e-07
ENSMUSG00000032122	Slc37a2	56857	solute carrier family 37 (glycerol-3-phosphate transporter), member 2	1.68411	0.000171638	0.00124602
ENSMUSG00000060878	Olfr1420	258405	olfactory receptor 1420	1.68002	3.99383e-05	0.000373098
ENSMUSG00000032525	Nktr	18087	natural killer tumor recognition sequence	1.66979	1.26306e-18	3.79054e-16
ENSMUSG00000020019	Ntn4	57764	netrin 4	1.66908	5.42221e-07	1.02274e-05
ENSMUSG00000024420	Zfp521	225207	zinc finger protein 521	1.6689	1.85717e-12	1.83561e-10
ENSMUSG00000050944	Efcab5	319634	EF-hand calcium binding domain 5	1.6648	1.29496e-07	3.04709e-06
ENSMUSG00000026832	Cytip	227929	cytohesin 1 interacting protein	1.66231	9.05703e-05	0.000732847
ENSMUSG00000020689	Itgb3	16416	integrin beta 3	1.66073	2.82166e-09	1.11056e-07
ENSMUSG00000025938	Slco5a1	240726	solute carrier organic anion transporter family, member 5A1	1.65262	0.000297709	0.00198171
ENSMUSG00000001506	Col1a1	12842	collagen, type I, alpha 1	1.64796	6.64621e-05	0.000566986
ENSMUSG00000044317	Gpr4	319197	G protein-coupled receptor 4	1.64305	4.42877e-07	8.70524e-06
ENSMUSG00000058620	Adra2b	11552	adrenergic receptor, alpha 2b	1.64174	4.78141e-06	6.42851e-05
ENSMUSG00000040732	Erg	13876	ETS transcription factor	1.64071	9.567e-06	0.000114927
ENSMUSG00000020728	Cep112	76380	centrosomal protein 112	1.63969	2.94613e-11	2.19083e-09
ENSMUSG00000024027	Glp1r	14652	glucagon-like peptide 1 receptor	1.63253	0.00136071	0.00691922
ENSMUSG00000024534	Sncaip	67847	synuclein, alpha interacting protein (synphilin)	1.62542	9.42342e-05	0.000756304
ENSMUSG00000028348	Cavin4	68016	caveolae associated 4	1.61712	5.50632e-07	1.03396e-05
ENSMUSG00000079466	Prdm12	381359	PR domain containing 12	1.61366	0.0111736	0.0375264
ENSMUSG00000040848	Sft2d2	108735	SFT2 domain containing 2	1.61073	2.20939e-14	3.43806e-12
ENSMUSG00000091735	Gpr62	436090	G protein-coupled receptor 62	1.6064	1.40342e-08	4.57091e-07
ENSMUSG00000000794	Kcnn3	140493	potassium intermediate/small conductance calcium-activated channel, subfamily N, member 3	1.60595	1.06008e-17	2.78371e-15
ENSMUSG00000026946	Nmi	64685	N-myc (and STAT) interactor	1.59953	3.92966e-08	1.09887e-06
ENSMUSG00000062296	Trank1	320429	tetratricopeptide repeat and ankyrin repeat containing 1	1.59922	2.49818e-10	1.38562e-08
ENSMUSG00000058006	Mdn1	100019	midasin AAA ATPase 1	1.5927	2.52276e-18	7.30992e-16
ENSMUSG00000037795	N4bp2	333789	NEDD4 binding protein 2	1.59189	1.51689e-10	9.1372e-09
ENSMUSG00000032344	Cgas	214763	cyclic GMP-AMP synthase	1.58809	1.24697e-08	4.1416e-07
ENSMUSG00000004270	Lpcat3	14792	lysophosphatidylcholine acyltransferase 3	1.58364	0.00027922	0.00187778
ENSMUSG00000056592	Zfp658	210104	zinc finger protein 658	1.58152	9.97591e-06	0.000119412
ENSMUSG00000031951	Tmem231	234740	transmembrane protein 231	1.57787	7.62585e-08	1.9157e-06
ENSMUSG00000075122	Cd80	12519	CD80 antigen	1.57701	0.0125546	0.0411612
ENSMUSG00000087075	Lbhd2	380787	LBH domain containing 2	1.57146	0.0004134	0.00257987
ENSMUSG00000027070	Lrp2	14725	low density lipoprotein receptor-related protein 2	1.56985	0.000296334	0.00197705
ENSMUSG00000044966	Fbxo48	319701	F-box protein 48	1.56896	0.000512448	0.00308903
ENSMUSG00000090693	Trim43a	547109	tripartite motif-containing 43A	1.56367	3.1503e-05	0.000306379
ENSMUSG00000066637	Ttc32	75516	tetratricopeptide repeat domain 32	1.56039	6.19442e-08	1.60159e-06
ENSMUSG00000032440	Tgfbr2	21813	transforming growth factor, beta receptor II	1.55775	7.32452e-06	9.14516e-05
ENSMUSG00000042320	Prox2	73422	prospero homeobox 2	1.55605	5.48867e-05	0.000484322
ENSMUSG00000020155	Kcnmb1	16533	potassium large conductance calcium-activated channel, subfamily M, beta member 1	1.55417	1.09173e-06	1.83109e-05
ENSMUSG00000050545	Fam228b	207921	family with sequence similarity 228, member B	1.55341	7.08736e-06	8.91169e-05
ENSMUSG00000050732	Vamp8	22320	vesicle-associated membrane protein 8	1.55335	5.95831e-09	2.17214e-07
ENSMUSG00000050675	Gp1ba	14723	glycoprotein 1b, alpha polypeptide	1.55022	5.65519e-05	0.000496817
ENSMUSG00000085925	Rtl1	353326	retrotransposon Gaglike 1	1.54916	1.07106e-06	1.80363e-05
ENSMUSG00000022148	Fyb	23880	FYN binding protein	1.54805	0.0019609	0.00936219
ENSMUSG00000015879	Fam184b	58227	family with sequence similarity 184, member B	1.54767	1.7122e-08	5.40886e-07
ENSMUSG00000038668	Lpar1	14745	lysophosphatidic acid receptor 1	1.54016	9.27506e-08	2.2789e-06
ENSMUSG00000041849	Card6	239319	caspase recruitment domain family, member 6	1.53966	0.000554294	0.00329868
ENSMUSG00000038304	Cd160	54215	CD160 antigen	1.53011	0.00011716	0.000906117
ENSMUSG00000040373	Cacng5	140723	calcium channel, voltage-dependent, gamma subunit 5	1.52993	1.46248e-11	1.1759e-09
ENSMUSG00000071550	Cfap44	212517	cilia and flagella associated protein 44	1.52573	0.00127325	0.00657601
ENSMUSG00000028532	Cachd1	320508	cache domain containing 1	1.52511	1.28316e-20	5.82834e-18
ENSMUSG00000032741	Tpcn1	252972	two pore channel 1	1.52324	1.25081e-07	2.96071e-06
ENSMUSG00000039358	Drd5	13492	dopamine receptor D5	1.5212	1.02535e-05	0.000122648
ENSMUSG00000072568	Lratd2	399603	LRAT domain containing 1	1.51928	4.97075e-09	1.84412e-07
ENSMUSG00000010529	Gm266	212539	predicted gene 266	1.51556	2.3765e-06	3.54387e-05
ENSMUSG00000021852	Slc35f4	75288	solute carrier family 35, member F4	1.51521	5.79381e-05	0.000507403
ENSMUSG00000052593	Adam17	11491	a disintegrin and metallopeptidase domain 17	1.51304	1.94102e-09	8.21683e-08
ENSMUSG00000068154	Insm1	53626	insulinoma-associated 1	1.51118	1.70518e-05	0.000187057
ENSMUSG00000035649	Zcchc7	319885	zinc finger, CCHC domain containing 7	1.50685	6.99454e-12	6.02822e-10
ENSMUSG00000030592	Ryr1	20190	ryanodine receptor 1, skeletal muscle	1.49797	0.00162826	0.00802933
ENSMUSG00000046610	Oacyl	319888	O-acyltransferase like	1.49567	2.30332e-10	1.31219e-08
ENSMUSG00000028766	Alpl	11647	alkaline phosphatase, liver/bone/kidney	1.49424	8.36084e-06	0.000102564
ENSMUSG00000040016	Ptger3	19218	prostaglandin E receptor 3 (subtype EP3)	1.48849	0.000119317	0.00091857
ENSMUSG00000051000	Fam160a1	229488	family with sequence similarity 160, member A1	1.48059	3.14976e-07	6.57577e-06
ENSMUSG00000015852	Fcrls	80891	Fc receptor-like S, scavenger receptor	1.47909	0.000154151	0.00113775
ENSMUSG00000018581	Dnah11	13411	dynein, axonemal, heavy chain 11	1.47743	0.000233234	0.00161772
ENSMUSG00000030760	Acer3	66190	alkaline ceramidase 3	1.47699	8.95875e-16	1.63653e-13
ENSMUSG00000021469	Msx2	17702	msh homeobox 2	1.47415	1.99662e-06	3.04359e-05
ENSMUSG00000061950	Ppp4r1	70351	protein phosphatase 4, regulatory subunit 1	1.47397	3.9432e-05	0.000368778
ENSMUSG00000035967	Ints6l	236790	integrator complex subunit 6 like	1.47164	2.97658e-06	4.33184e-05
ENSMUSG00000057378	Ryr3	20192	ryanodine receptor 3	1.46527	6.3566e-18	1.78048e-15
ENSMUSG00000040852	Plekhh2	213556	pleckstrin homology domain containing, family H (with MyTH4 domain) member 2	1.46432	0.000363114	0.00232653
ENSMUSG00000022512	Cldn1	12737	claudin 1	1.46254	3.00391e-05	0.000294194
ENSMUSG00000045657	Pcdhb10	93881	protocadherin beta 10	1.45977	0.000504111	0.00304861
ENSMUSG00000016493	Cd46	17221	CD46 antigen, complement regulatory protein	1.45327	4.25217e-05	0.000393513
ENSMUSG00000036208	Nepro	212547	nucleolus and neural progenitor protein	1.45306	5.68517e-08	1.49289e-06
ENSMUSG00000032411	Tfdp2	211586	transcription factor Dp 2	1.45247	6.03274e-10	2.95175e-08
ENSMUSG00000024610	Cd74	16149	CD74 antigen (invariant polypeptide of major histocompatibility complex, class II antigen-associated)	1.45218	0.00238473	0.0109562
ENSMUSG00000041120	Nbl1	17965	NBL1, DAN family BMP antagonist	1.44836	1.47914e-08	4.76216e-07
ENSMUSG00000039994	Timeless	21853	timeless circadian clock 1	1.44788	5.17415e-06	6.87949e-05
ENSMUSG00000024552	Slc14a2	27411	solute carrier family 14 (urea transporter), member 2	1.44676	0.000259726	0.00177565
ENSMUSG00000060445	Sycp2	320558	synaptonemal complex protein 2	1.44585	3.91761e-05	0.000366998
ENSMUSG00000008734	Gprc5b	64297	G protein-coupled receptor, family C, group 5, member B	1.44534	2.22772e-09	9.2442e-08
ENSMUSG00000034460	Six4	20474	sine oculis-related homeobox 4	1.44473	0.00499402	0.019651
ENSMUSG00000034617	Mtrr	210009	5-methyltetrahydrofolate-homocysteine methyltransferase reductase	1.44407	2.68221e-09	1.08099e-07
ENSMUSG00000104257	Gm20172	100504323	predicted gene, 20172	1.43999	1.23136e-12	1.30153e-10
ENSMUSG00000051111	Sv2c	75209	synaptic vesicle glycoprotein 2c	1.43913	4.33324e-16	8.46796e-14
ENSMUSG00000074264	Amy1	11722	amylase 1, salivary	1.43751	0.000307912	0.00203359
ENSMUSG00000025779	Ly96	17087	lymphocyte antigen 96	1.43414	0.00119863	0.00626567
ENSMUSG00000040187	Arntl2	272322	aryl hydrocarbon receptor nuclear translocator-like 2	1.43307	3.64796e-05	0.000347155
ENSMUSG00000034947	Tmem106a	217203	transmembrane protein 106A	1.4299	0.000383726	0.00242349
ENSMUSG00000022132	Cldn10	58187	claudin 10	1.42714	8.30219e-05	0.000680002
ENSMUSG00000037553	Zdhhc18	503610	zinc finger, DHHC domain containing 18	1.42707	3.07927e-05	0.000301048
ENSMUSG00000040181	Fmo1	14261	flavin containing monooxygenase 1	1.42683	0.00115007	0.00605515
ENSMUSG00000022575	Gsdmd	69146	gasdermin D	1.42456	1.37284e-06	2.2206e-05
ENSMUSG00000029700	Slc13a1	55961	solute carrier family 13 (sodium/sulfate symporters), member 1	1.41846	1.70722e-07	3.82554e-06
ENSMUSG00000040632	Nrl	18185	neural retina leucine zipper gene	1.41459	6.75999e-05	0.000575524
ENSMUSG00000042045	Sln	66402	sarcolipin	1.41424	2.15752e-05	0.000225493
ENSMUSG00000031425	Plp1	18823	proteolipid protein (myelin) 1	1.4123	1.21926e-16	2.5485e-14
ENSMUSG00000086040	Wipf3	330319	WAS/WASL interacting protein family, member 3	1.41015	6.00633e-31	2.52356e-27
ENSMUSG00000061859	Patj	12695	PATJ, crumbs cell polarity complex component	1.40851	1.3857e-07	3.21214e-06
ENSMUSG00000036168	Ccdc38	237465	coiled-coil domain containing 38	1.40717	0.00026046	0.00177794
ENSMUSG00000026873	Phf19	74016	PHD finger protein 19	1.40513	0.00194371	0.00929863
ENSMUSG00000085272	Sbk3	381835	SH3 domain binding kinase family, member 3	1.40479	0.00261356	0.0117726
ENSMUSG00000028017	Egf	13645	epidermal growth factor	1.39887	0.00232801	0.0107514
ENSMUSG00000029999	Tgfa	21802	transforming growth factor alpha	1.39759	1.64761e-20	7.28675e-18
ENSMUSG00000031355	Arhgap6	11856	Rho GTPase activating protein 6	1.39707	2.31135e-10	1.31232e-08
ENSMUSG00000035004	Igsf6	80719	immunoglobulin superfamily, member 6	1.3946	5.78795e-07	1.08321e-05
ENSMUSG00000030047	Arhgap25	232201	Rho GTPase activating protein 25	1.39105	0.0029297	0.0129094
ENSMUSG00000046947	Adck2	57869	aarF domain containing kinase 2	1.39036	5.43526e-06	7.18686e-05
ENSMUSG00000075324	Fign	60344	fidgetin	1.38655	1.5868e-06	2.49699e-05
ENSMUSG00000033420	Antxr1	69538	anthrax toxin receptor 1	1.38424	0.000234389	0.00162506
ENSMUSG00000023235	Ccl25	20300	chemokine (C-C motif) ligand 25	1.3778	1.28457e-13	1.78036e-11
ENSMUSG00000102758	Naaladl2	635702	N-acetylated alpha-linked acidic dipeptidase-like 2	1.37623	0.000485593	0.00295769
ENSMUSG00000056966	Gjc3	118446	gap junction protein, gamma 3	1.37488	4.81247e-14	7.22129e-12
ENSMUSG00000026923	Notch1	18128	notch 1	1.37355	0.000946547	0.00513151
ENSMUSG00000092335	Zfp977	637776	zinc finger protein 977	1.37054	0.00015326	0.00113317
ENSMUSG00000027887	Sypl2	17306	synaptophysin-like 2	1.36445	0.0098108	0.0338008
ENSMUSG00000021495	Fam193b	212483	family with sequence similarity 193, member B	1.3634	3.51508e-08	9.92847e-07
ENSMUSG00000090394	4930523C07Rik	67647	RIKEN cDNA 4930523C07 gene	1.36155	2.99495e-05	0.00029383
ENSMUSG00000040055	Gjb6	14623	gap junction protein, beta 6	1.36084	1.30684e-11	1.06101e-09
ENSMUSG00000052942	Glis3	226075	GLIS family zinc finger 3	1.36056	1.76815e-05	0.000192458
ENSMUSG00000029468	P2rx7	18439	purinergic receptor P2X, ligand-gated ion channel, 7	1.35987	5.28508e-05	0.000469952
ENSMUSG00000040624	Plekhg1	213783	pleckstrin homology domain containing, family G (with RhoGef domain) member 1	1.35983	6.09648e-06	7.88134e-05
ENSMUSG00000047988	4933428G20Rik	100141474	RIKEN cDNA 4933428G20 gene	1.35845	7.85735e-08	1.96212e-06
ENSMUSG00000026686	Lmx1a	110648	LIM homeobox transcription factor 1 alpha	1.35636	4.16601e-07	8.28568e-06
ENSMUSG00000022949	Clic6	209195	chloride intracellular channel 6	1.35443	1.92858e-05	0.000206181
ENSMUSG00000015533	Itga2	16398	integrin alpha 2	1.35437	8.16217e-08	2.02619e-06
ENSMUSG00000022899	Slc15a2	57738	solute carrier family 15 (H+/peptide transporter), member 2	1.35369	1.53314e-06	2.43305e-05
ENSMUSG00000022098	Bmp1	12153	bone morphogenetic protein 1	1.35356	0.000221645	0.00155013
ENSMUSG00000021624	Cd180	17079	CD180 antigen	1.3533	0.0024776	0.0112872
ENSMUSG00000047534	Mis18bp1	217653	MIS18 binding protein 1	1.35111	9.75192e-08	2.36722e-06
ENSMUSG00000103332	Pcdhga2	93710	protocadherin gamma subfamily A, 2	1.34847	0.000816814	0.00455279
ENSMUSG00000021990	Spata13	219140	spermatogenesis associated 13	1.34765	5.67697e-10	2.79503e-08
ENSMUSG00000062866	Phactr2	215789	phosphatase and actin regulator 2	1.34688	3.01747e-09	1.18485e-07
ENSMUSG00000046321	Hs3st2	195646	heparan sulfate (glucosamine) 3-O-sulfotransferase 2	1.34427	8.16406e-06	0.000100679
ENSMUSG00000019846	Lama4	16775	laminin, alpha 4	1.34335	8.56794e-06	0.000104646
ENSMUSG00000032841	Prr5l	72446	proline rich 5 like	1.34135	1.34459e-05	0.00015258
ENSMUSG00000004626	Stxbp2	20911	syntaxin binding protein 2	1.33979	0.0057168	0.0219955
ENSMUSG00000026271	Gpr35	64095	G protein-coupled receptor 35	1.33942	0.00117421	0.00615524
ENSMUSG00000053040	Aph1c	68318	aph1 homolog C, gamma secretase subunit	1.33462	2.92535e-08	8.55016e-07
ENSMUSG00000031775	Pllp	67801	plasma membrane proteolipid	1.32844	1.53942e-06	2.43922e-05
ENSMUSG00000033703	Fcsk	234730	fucose kinase	1.32648	2.99973e-05	0.000294107
ENSMUSG00000026519	Tmem63a	208795	transmembrane protein 63a	1.32632	3.27645e-08	9.38274e-07
ENSMUSG00000025278	Flnb	286940	filamin, beta	1.32576	8.43419e-05	0.000688751
ENSMUSG00000039720	Got1l1	76615	glutamic-oxaloacetic transaminase 1-like 1	1.32549	0.00230822	0.0106776
ENSMUSG00000026090	Cracdl	72097	capping protein inhibiting regulator of actin like	1.32315	6.79133e-10	3.27975e-08
ENSMUSG00000042138	Msantd2	235184	Myb/SANT-like DNA-binding domain containing 2	1.32242	0.000416952	0.00259722
ENSMUSG00000025997	Ikzf2	22779	IKAROS family zinc finger 2	1.32131	0.000273368	0.00184507
ENSMUSG00000049013	Prss48	368202	protease, serine 48	1.31947	3.15602e-07	6.58064e-06
ENSMUSG00000025816	Sec61a2	57743	Sec61, alpha subunit 2 (S. cerevisiae)	1.31839	1.04729e-07	2.52161e-06
ENSMUSG00000028868	Wasf2	242687	WAS protein family, member 2	1.3174	5.51337e-06	7.25589e-05
ENSMUSG00000018820	Zfyve27	319740	zinc finger, FYVE domain containing 27	1.31735	7.60119e-08	1.91236e-06
ENSMUSG00000078612	Fyb2	242594	FYN binding protein 2	1.31643	0.000618909	0.00361913
ENSMUSG00000044017	Adgrd1	243277	adhesion G protein-coupled receptor D1	1.31463	8.05634e-05	0.000663375
ENSMUSG00000020407	Upp1	22271	uridine phosphorylase 1	1.31356	7.99482e-05	0.000659278
ENSMUSG00000050954	Zfp169	67911	zinc finger protein 169	1.31259	3.2772e-08	9.38274e-07
ENSMUSG00000018486	Wnt9b	22412	wingless-type MMTV integration site family, member 9B	1.30812	0.00690647	0.0255351
ENSMUSG00000037071	Scd1	20249	stearoyl-Coenzyme A desaturase 1	1.30752	4.76086e-10	2.40997e-08
ENSMUSG00000033717	Adra2a	11551	adrenergic receptor, alpha 2a	1.30616	1.83762e-06	2.83071e-05
ENSMUSG00000027379	Bub1	12235	BUB1, mitotic checkpoint serine/threonine kinase	1.30521	0.000663621	0.00383258
ENSMUSG00000023947	Nfkbie	18037	nuclear factor of kappa light polypeptide gene enhancer in B cells inhibitor, epsilon	1.30505	0.000955293	0.00517558
ENSMUSG00000026955	Sapcd2	72080	suppressor APC domain containing 2	1.30363	0.0122759	0.0404053
ENSMUSG00000015053	Gata2	14461	GATA binding protein 2	1.30325	5.45557e-05	0.000482814
ENSMUSG00000033446	Lpar6	67168	lysophosphatidic acid receptor 6	1.30287	0.000120507	0.000926501
ENSMUSG00000019890	Nts	67405	neurotensin	1.30018	8.73203e-06	0.000106418
ENSMUSG00000048058	Ldlrad3	241576	low density lipoprotein receptor class A domain containing 3	1.29799	0.00170723	0.00835241
ENSMUSG00000073460	Pnldc1	240023	poly(A)-specific ribonuclease (PARN)-like domain containing 1	1.29664	0.000301087	0.00199768
ENSMUSG00000046152	Fut10	171167	fucosyltransferase 10	1.29654	0.00709229	0.0260531
ENSMUSG00000059820	Nkapd1	270156	NKAP domain containing 1	1.29589	1.04855e-09	4.80163e-08
ENSMUSG00000054626	Xlr	22441	X-linked lymphocyte-regulated	1.29576	2.3864e-05	0.000243657
ENSMUSG00000020901	Pik3r5	320207	phosphoinositide-3-kinase regulatory subunit 5	1.29366	0.00378195	0.0157833
ENSMUSG00000030990	Pgap2	233575	post-GPI attachment to proteins 2	1.28949	0.000154571	0.00113985
ENSMUSG00000022130	Tgds	76355	TDP-glucose 4,6-dehydratase	1.28821	0.000101034	0.000801689
ENSMUSG00000044906	4930503L19Rik	269033	RIKEN cDNA 4930503L19 gene	1.2866	4.51295e-06	6.14624e-05
ENSMUSG00000032194	Kank2	235041	KN motif and ankyrin repeat domains 2	1.2852	0.00489675	0.0193362
ENSMUSG00000015880	Ncapg	54392	non-SMC condensin I complex, subunit G	1.28392	0.000868304	0.00477916
ENSMUSG00000018166	Erbb3	13867	erb-b2 receptor tyrosine kinase 3	1.28285	0.00678475	0.0252337
ENSMUSG00000042115	Klhdc8a	213417	kelch domain containing 8A	1.28212	0.00183913	0.00888175
ENSMUSG00000037225	Fgf2	14173	fibroblast growth factor 2	1.28204	3.25081e-12	2.98541e-10
ENSMUSG00000026463	Atp2b4	381290	ATPase, Ca++ transporting, plasma membrane 4	1.28081	4.26782e-06	5.87428e-05
ENSMUSG00000044734	Serpinb1a	66222	serine (or cysteine) peptidase inhibitor, clade B, member 1a	1.28001	5.76959e-06	7.55727e-05
ENSMUSG00000021221	Dpf3	70127	D4, zinc and double PHD fingers, family 3	1.27973	6.39277e-06	8.20755e-05
ENSMUSG00000032537	Ephb1	270190	Eph receptor B1	1.27939	0.000976043	0.0052727
ENSMUSG00000024395	Lims2	225341	LIM and senescent cell antigen like domains 2	1.27934	0.00199442	0.00948988
ENSMUSG00000005547	Cyp2a5	13087	cytochrome P450, family 2, subfamily a, polypeptide 5	1.27913	5.10492e-08	1.36396e-06
ENSMUSG00000071636	Rimbp3	239731	RIMS binding protein 3	1.27894	8.63387e-05	0.00070369
ENSMUSG00000021078	Tomm20l	75266	translocase of outer mitochondrial membrane 20-like	1.27756	0.00199936	0.00951068
ENSMUSG00000050473	Slc35d3	76157	solute carrier family 35, member D3	1.27658	0.000203804	0.00144034
ENSMUSG00000040204	Pclaf	68026	PCNA clamp associated factor	1.27533	0.00574958	0.0220964
ENSMUSG00000042997	Nhlrc3	212114	NHL repeat containing 3	1.27526	0.000229858	0.00159694
ENSMUSG00000037035	Inhbb	16324	inhibin beta-B	1.27454	9.92419e-05	0.000790455
ENSMUSG00000002257	Def6	23853	differentially expressed in FDCP 6	1.27445	0.000121728	0.000934989
ENSMUSG00000023191	P3h3	14789	prolyl 3-hydroxylase 3	1.27434	2.78678e-05	0.000276791
ENSMUSG00000022708	Zbtb20	56490	zinc finger and BTB domain containing 20	1.27376	1.49586e-17	3.64338e-15
ENSMUSG00000019295	Tmem129	68366	transmembrane protein 129	1.27298	5.23746e-08	1.39273e-06
ENSMUSG00000005897	Nr2c1	22025	nuclear receptor subfamily 2, group C, member 1	1.27282	3.33968e-05	0.000321458
ENSMUSG00000052613	Pcdh15	11994	protocadherin 15	1.27193	9.50929e-06	0.000114561
ENSMUSG00000016239	Lonrf3	74365	LON peptidase N-terminal domain and ring finger 3	1.27016	8.5706e-07	1.48339e-05
ENSMUSG00000090272	Mndal	100040462	myeloid nuclear differentiation antigen like	1.26798	1.10856e-05	0.00013074
ENSMUSG00000016918	Sulf1	240725	sulfatase 1	1.2677	0.000133468	0.00100812
ENSMUSG00000092260	Zfp963	620419	zinc finger protein 963	1.26521	1.33752e-05	0.000151881
ENSMUSG00000039242	B3galnt2	97884	UDP-GalNAc:betaGlcNAc beta 1,3-galactosaminyltransferase, polypeptide 2	1.26288	5.72131e-09	2.09027e-07
ENSMUSG00000079355	Ackr4	252837	atypical chemokine receptor 4	1.26265	9.20136e-06	0.000111331
ENSMUSG00000015133	Lrrk1	233328	leucine-rich repeat kinase 1	1.26177	8.26592e-07	1.44705e-05
ENSMUSG00000037846	Rtkn2	170799	rhotekin 2	1.26118	0.000875073	0.00481037
ENSMUSG00000034832	Tet3	194388	tet methylcytosine dioxygenase 3	1.26103	7.78317e-12	6.57306e-10
ENSMUSG00000003228	Grk5	14773	G protein-coupled receptor kinase 5	1.25816	2.71017e-10	1.4788e-08
ENSMUSG00000068950	Olfr338	258949	olfactory receptor 338	1.25564	0.00068409	0.00392651
ENSMUSG00000027456	Sdcbp2	228765	syndecan binding protein (syntenin) 2	1.25319	3.25315e-06	4.69291e-05
ENSMUSG00000026029	Casp8	12370	caspase 8	1.25272	0.000213699	0.00150269
ENSMUSG00000020059	Sycp3	20962	synaptonemal complex protein 3	1.2526	0.0100966	0.0345237
ENSMUSG00000004880	Lbr	98386	lamin B receptor	1.2481	8.82041e-05	0.000717154
ENSMUSG00000021703	Serinc5	218442	serine incorporator 5	1.24707	7.00074e-11	4.6139e-09
ENSMUSG00000050549	Fam241a	70617	family with sequence similarity 241, member A	1.24425	8.75281e-06	0.000106519
ENSMUSG00000091318	Gm5415	408191	predicted gene 5415	1.24353	0.00121838	0.00635147
ENSMUSG00000024413	Npc1	18145	NPC intracellular cholesterol transporter 1	1.24236	3.40307e-05	0.000326625
ENSMUSG00000104063	Pcdhgb7	93704	protocadherin gamma subfamily B, 7	1.24235	0.000280539	0.00188363
ENSMUSG00000074480	Mex3a	72640	mex3 RNA binding family member A	1.24105	4.27711e-05	0.000395577
ENSMUSG00000090523	Gypc	71683	glycophorin C	1.2398	4.96601e-10	2.49877e-08
ENSMUSG00000051166	Eml5	319670	echinoderm microtubule associated protein like 5	1.23854	4.68333e-17	1.06362e-14
ENSMUSG00000025184	R3hcc1l	52013	R3H domain and coiled-coil containing 1 like	1.23721	5.2132e-11	3.5615e-09
ENSMUSG00000041695	Kcnj2	16518	potassium inwardly-rectifying channel, subfamily J, member 2	1.23719	0.000538734	0.00321695
ENSMUSG00000079227	Ccr5	12774	chemokine (C-C motif) receptor 5	1.2335	0.00411768	0.0168949
ENSMUSG00000037801	Iqch	78250	IQ motif containing H	1.23285	1.3085e-08	4.29505e-07
ENSMUSG00000021098	4930447C04Rik	75801	RIKEN cDNA 4930447C04 gene	1.23259	0.000613979	0.00359531
ENSMUSG00000029587	Zfp12	231866	zinc finger protein 12	1.23215	0.00091732	0.00499886
ENSMUSG00000098176	Ccdc166	223648	coiled-coil domain containing 166	1.23187	0.000523204	0.00313922
ENSMUSG00000031217	Efnb1	13641	ephrin B1	1.22899	0.000274926	0.00185187
ENSMUSG00000048416	Mlf1	17349	myeloid leukemia factor 1	1.22728	0.000619285	0.00362007
ENSMUSG00000046841	Ckap4	216197	cytoskeleton-associated protein 4	1.22614	0.000821543	0.00457483
ENSMUSG00000063605	Ccdc102a	234582	coiled-coil domain containing 102A	1.22572	4.8332e-05	0.00043788
ENSMUSG00000047759	Hs3st3a1	15478	heparan sulfate (glucosamine) 3-O-sulfotransferase 3A1	1.22531	0.00340092	0.0145139
ENSMUSG00000035678	Tnfsf9	21950	tumor necrosis factor (ligand) superfamily, member 9	1.22525	4.95186e-07	9.53275e-06
ENSMUSG00000026429	Ube2t	67196	ubiquitin-conjugating enzyme E2T	1.22246	0.00712988	0.026139
ENSMUSG00000032625	Thsd7a	330267	thrombospondin, type I, domain containing 7A	1.22187	2.2766e-09	9.40063e-08
ENSMUSG00000074934	Grem1	23892	gremlin 1, DAN family BMP antagonist	1.22089	2.66427e-05	0.00026684
ENSMUSG00000034227	Foxj1	15223	forkhead box J1	1.21868	0.00207042	0.00976851
ENSMUSG00000028289	Epha7	13841	Eph receptor A7	1.2176	1.16334e-29	2.44389e-26
ENSMUSG00000001260	Gabrg1	14405	gamma-aminobutyric acid (GABA) A receptor, subunit gamma 1	1.21496	0.000193188	0.00137573
ENSMUSG00000004665	Cnn2	12798	calponin 2	1.21414	0.00102632	0.0054861
ENSMUSG00000035158	Mitf	17342	melanogenesis associated transcription factor	1.21376	6.91117e-08	1.75452e-06
ENSMUSG00000074158	Zfp976	208111	zinc finger protein 976	1.21299	1.2839e-05	0.00014744
ENSMUSG00000034551	Hdx	245596	highly divergent homeobox	1.21171	0.00174119	0.00849416
ENSMUSG00000021176	Efcab11	78767	EF-hand calcium binding domain 11	1.21163	0.00341956	0.014575
ENSMUSG00000041565	L3mbtl4	320858	L3MBTL4 histone methyl-lysine binding protein	1.21135	2.72486e-06	4.00647e-05
ENSMUSG00000049493	Pls1	102502	plastin 1 (I-isoform)	1.21025	4.75925e-06	6.40384e-05
ENSMUSG00000042567	Nek10	674895	NIMA (never in mitosis gene a)- related kinase 10	1.20939	0.00044784	0.00275188
ENSMUSG00000022288	4930447A16Rik	74892	RIKEN cDNA 4930447A16 gene	1.20938	5.46512e-05	0.00048315
ENSMUSG00000022615	Tymp	72962	thymidine phosphorylase	1.20881	0.000311063	0.00205089
ENSMUSG00000037279	Ovol2	107586	ovo like zinc finger 2	1.20802	0.00966928	0.0333885
ENSMUSG00000094942	Gm3604	100041979	predicted gene 3604	1.20731	4.30093e-05	0.000397151
ENSMUSG00000019945	Cabcoco1	73287	ciliary associated calcium binding coiled-coil 1	1.20724	0.00133955	0.00683854
ENSMUSG00000028610	Dmrtb1	56296	DMRT-like family B with proline-rich C-terminal, 1	1.20508	0.0149417	0.0471038
ENSMUSG00000028186	Uox	22262	urate oxidase	1.2027	1.20633e-06	1.99347e-05
ENSMUSG00000006678	Pola1	18968	polymerase (DNA directed), alpha 1	1.19798	0.00176507	0.00859323
ENSMUSG00000021318	Gli3	14634	GLI-Kruppel family member GLI3	1.19656	7.32512e-05	0.000613995
ENSMUSG00000029007	Agtrap	11610	angiotensin II, type I receptor-associated protein	1.19617	1.31177e-05	0.000149665
ENSMUSG00000063458	Lrmda	76633	leucine rich melanocyte differentiation associated	1.19512	0.00110029	0.00582593
ENSMUSG00000028581	Laptm5	16792	lysosomal-associated protein transmembrane 5	1.1937	0.00136738	0.00694057
ENSMUSG00000070643	Sox13	20668	SRY (sex determining region Y)-box 13	1.19323	0.00943766	0.0327367
ENSMUSG00000034317	Trim59	66949	tripartite motif-containing 59	1.19211	1.51606e-08	4.8717e-07
ENSMUSG00000074625	Arhgap40	545481	Rho GTPase activating protein 40	1.19173	4.60704e-05	0.00042148
ENSMUSG00000026288	Inpp5d	16331	inositol polyphosphate-5-phosphatase D	1.19064	6.38644e-05	0.000548725
ENSMUSG00000059742	Kcnh7	170738	potassium voltage-gated channel, subfamily H (eag-related), member 7	1.18829	1.86227e-20	8.02496e-18
ENSMUSG00000004633	Chn2	69993	chimerin 2	1.18746	7.00752e-10	3.34569e-08
ENSMUSG00000072494	Ppp1r3e	105651	protein phosphatase 1, regulatory subunit 3E	1.18596	0.000279647	0.00187966
ENSMUSG00000057457	Phex	18675	phosphate regulating endopeptidase homolog, X-linked	1.18448	1.18097e-05	0.000137976
ENSMUSG00000039298	Cdk5rap2	214444	CDK5 regulatory subunit associated protein 2	1.18362	3.77683e-07	7.6382e-06
ENSMUSG00000033581	Igf2bp2	319765	insulin-like growth factor 2 mRNA binding protein 2	1.18258	0.0044966	0.018133
ENSMUSG00000039748	Exo1	26909	exonuclease 1	1.17963	1.7919e-06	2.773e-05
ENSMUSG00000041809	Efhc1	71877	EF-hand domain (C-terminal) containing 1	1.17769	8.49349e-06	0.000103888
ENSMUSG00000004655	Aqp1	11826	aquaporin 1	1.17702	5.4169e-07	1.02274e-05
ENSMUSG00000074579	Lekr1	624866	leucine, glutamate and lysine rich 1	1.17695	1.29256e-05	0.000147874
ENSMUSG00000048191	Muc6	353328	mucin 6, gastric	1.17691	2.31279e-05	0.000238751
ENSMUSG00000025584	Pde8a	18584	phosphodiesterase 8A	1.17623	0.00019806	0.00140625
ENSMUSG00000021733	Slc4a7	218756	solute carrier family 4, sodium bicarbonate cotransporter, member 7	1.17392	3.13483e-09	1.22521e-07
ENSMUSG00000036339	Tmem260	218989	transmembrane protein 260	1.17356	4.09056e-07	8.16744e-06
ENSMUSG00000039005	Tlr4	21898	toll-like receptor 4	1.17145	0.00132883	0.00680033
ENSMUSG00000031503	Col4a2	12827	collagen, type IV, alpha 2	1.17007	0.0153549	0.0481491
ENSMUSG00000027168	Pax6	18508	paired box 6	1.16987	0.000145175	0.00108244
ENSMUSG00000020431	Adcy1	432530	adenylate cyclase 1	1.16961	2.8587e-20	1.14389e-17
ENSMUSG00000047996	Prrg1	546336	proline rich Gla (G-carboxyglutamic acid) 1	1.16835	0.00211468	0.00993188
ENSMUSG00000035840	Lysmd3	80289	LysM, putative peptidoglycan-binding, domain containing 3	1.1673	1.16332e-05	0.000136337
ENSMUSG00000025759	Mfsd8	72175	major facilitator superfamily domain containing 8	1.16665	2.23735e-09	9.26133e-08
ENSMUSG00000056870	Gulp1	70676	GULP, engulfment adaptor PTB domain containing 1	1.16639	0.00231566	0.0107062
ENSMUSG00000040943	Tet2	214133	tet methylcytosine dioxygenase 2	1.1661	3.51465e-15	6.08941e-13
ENSMUSG00000038267	Slc22a23	73102	solute carrier family 22, member 23	1.16236	2.6447e-06	3.9057e-05
ENSMUSG00000021097	Clmn	94040	calmin	1.1622	1.93608e-13	2.4838e-11
ENSMUSG00000017550	Atad5	237877	ATPase family, AAA domain containing 5	1.16216	3.83435e-09	1.48138e-07
ENSMUSG00000031993	Snx19	102607	sorting nexin 19	1.16194	0.00138417	0.00701093
ENSMUSG00000073680	Tmem88b	320587	transmembrane protein 88B	1.16097	5.41248e-12	4.81281e-10
ENSMUSG00000015968	Cacna1d	12289	calcium channel, voltage-dependent, L type, alpha 1D subunit	1.15893	2.1448e-09	8.94428e-08
ENSMUSG00000095789	Nupr1l	69034	nuclear protein transcriptional regulator 1 like	1.15892	0.00257144	0.0116328
ENSMUSG00000038816	Ctnnal1	54366	catenin (cadherin associated protein), alpha-like 1	1.15884	0.000271028	0.00183369
ENSMUSG00000050640	Tmem150c	231503	transmembrane protein 150C	1.15597	1.73073e-05	0.000189243
ENSMUSG00000023972	Ptk7	71461	PTK7 protein tyrosine kinase 7	1.15479	6.10628e-06	7.88188e-05
ENSMUSG00000074272	Ceacam1	26365	carcinoembryonic antigen-related cell adhesion molecule 1	1.15236	0.0111489	0.0374589
ENSMUSG00000007209	Ceacam9	26368	carcinoembryonic antigen-related cell adhesion molecule 9	1.15222	0.000356477	0.00229538
ENSMUSG00000047881	Rell1	100532	RELT-like 1	1.15146	0.000182953	0.00131567
ENSMUSG00000051457	Spn	20737	sialophorin	1.15054	5.06713e-05	0.000454904
ENSMUSG00000036304	Zdhhc23	332175	zinc finger, DHHC domain containing 23	1.15038	2.43698e-09	9.94075e-08
ENSMUSG00000030110	Ret	19713	ret proto-oncogene	1.14976	0.000144544	0.00107869
ENSMUSG00000029452	Tmem116	77462	transmembrane protein 116	1.1491	0.00040763	0.0025543
ENSMUSG00000026575	Nme7	171567	NME/NM23 family member 7	1.14736	0.0013324	0.00681349
ENSMUSG00000035212	Leprot	230514	leptin receptor overlapping transcript	1.14666	0.000497419	0.00301525
ENSMUSG00000029253	Cenpc1	12617	centromere protein C1	1.14558	6.26409e-12	5.48304e-10
ENSMUSG00000038732	Mboat1	218121	membrane bound O-acyltransferase domain containing 1	1.14474	0.00186174	0.008978
ENSMUSG00000025241	Fyco1	17281	FYVE and coiled-coil domain containing 1	1.14191	0.000260137	0.00177715
ENSMUSG00000022231	Sema5a	20356	sema domain, seven thrombospondin repeats (type 1 and type 1-like), transmembrane domain (TM) and short cytoplasmic domain, (semaphorin) 5A	1.14128	2.38168e-20	1.00066e-17
ENSMUSG00000034656	Cacna1a	12286	calcium channel, voltage-dependent, P/Q type, alpha 1A subunit	1.14088	1.485e-10	9.00971e-09
ENSMUSG00000025608	Podxl	27205	podocalyxin-like	1.14081	0.00772406	0.0278923
ENSMUSG00000041361	Myzap	102371	myocardial zonula adherens protein	1.14057	0.00385071	0.0159988
ENSMUSG00000042066	Tmcc2	68875	transmembrane and coiled-coil domains 2	1.13703	9.56687e-06	0.000114927
ENSMUSG00000061882	Ccdc62	208908	coiled-coil domain containing 62	1.13445	0.0124969	0.041004
ENSMUSG00000031548	Sfrp1	20377	secreted frizzled-related protein 1	1.13415	0.00201272	0.009558
ENSMUSG00000028876	Epha10	230735	Eph receptor A10	1.13236	0.000815478	0.00455011
ENSMUSG00000038212	Mfsd14b	66631	major facilitator superfamily domain containing 14B	1.13225	2.05626e-11	1.57079e-09
ENSMUSG00000039087	Rreb1	68750	ras responsive element binding protein 1	1.1321	0.000101436	0.000804123
ENSMUSG00000090291	Lrrc10b	278795	leucine rich repeat containing 10B	1.1321	2.82087e-08	8.27358e-07
ENSMUSG00000029371	Cxcl5	20311	chemokine (C-X-C motif) ligand 5	1.13195	0.00117787	0.00616887
ENSMUSG00000022952	Runx1	12394	runt related transcription factor 1	1.13187	0.00658701	0.0246331
ENSMUSG00000020723	Cacng4	54377	calcium channel, voltage-dependent, gamma subunit 4	1.13157	2.43108e-05	0.000247317
ENSMUSG00000074733	Zfp950	414758	zinc finger protein 950	1.1313	1.74413e-09	7.55458e-08
ENSMUSG00000041144	Dnah7b	227058	dynein, axonemal, heavy chain 7B	1.13107	0.00217947	0.0101773
ENSMUSG00000031661	Nkd1	93960	naked cuticle 1	1.13044	0.00195815	0.00935171
ENSMUSG00000030307	Slc6a11	243616	solute carrier family 6 (neurotransmitter transporter, GABA), member 11	1.13015	1.93317e-09	8.20425e-08
ENSMUSG00000036833	Pnpla7	241274	patatin-like phospholipase domain containing 7	1.12849	0.00084629	0.0046847
ENSMUSG00000096014	Sox1	20664	SRY (sex determining region Y)-box 1	1.12811	9.48181e-12	7.92793e-10
ENSMUSG00000078591	Hs3st4	628779	heparan sulfate (glucosamine) 3-O-sulfotransferase 4	1.12789	6.80174e-13	7.72366e-11
ENSMUSG00000026354	Lct	226413	lactase	1.12634	6.15683e-08	1.59432e-06
ENSMUSG00000022676	Snai2	20583	snail family zinc finger 2	1.12614	2.67546e-07	5.69162e-06
ENSMUSG00000004110	Cacna1e	12290	calcium channel, voltage-dependent, R type, alpha 1E subunit	1.12583	1.7129e-27	2.06198e-24
ENSMUSG00000029687	Ezh2	14056	enhancer of zeste 2 polycomb repressive complex 2 subunit	1.12538	1.98582e-05	0.000211226
ENSMUSG00000039934	Gsap	212167	gamma-secretase activating protein	1.12521	0.000941784	0.00511393
ENSMUSG00000035506	Slc12a8	171286	solute carrier family 12 (potassium/chloride transporters), member 8	1.12406	1.63363e-05	0.000180286
ENSMUSG00000059003	Grin2a	14811	glutamate receptor, ionotropic, NMDA2A (epsilon 1)	1.12383	1.48738e-28	2.49969e-25
ENSMUSG00000021432	Slc35b3	108652	solute carrier family 35, member B3	1.12143	0.000129169	0.000981377
ENSMUSG00000025157	Zdhhc16	74168	zinc finger, DHHC domain containing 16	1.12036	0.00270046	0.0120972
ENSMUSG00000055026	Gabrg3	14407	gamma-aminobutyric acid (GABA) A receptor, subunit gamma 3	1.11759	2.7765e-09	1.10546e-07
ENSMUSG00000074505	Fat3	270120	FAT atypical cadherin 3	1.11745	2.60694e-12	2.47526e-10
ENSMUSG00000055313	Pgbd1	319207	piggyBac transposable element derived 1	1.11713	0.000358366	0.00230578
ENSMUSG00000079659	Tmem243	652925	transmembrane protein 243, mitochondrial	1.11661	5.2221e-05	0.000466326
ENSMUSG00000001930	Vwf	22371	Von Willebrand factor	1.11583	0.00778469	0.0280569
ENSMUSG00000051678	Pcdhb6	93877	protocadherin beta 6	1.11383	0.00586788	0.0224637
ENSMUSG00000103585	Pcdhgb4	93701	protocadherin gamma subfamily B, 4	1.11284	0.000224582	0.00156676
ENSMUSG00000035948	Acss3	380660	acyl-CoA synthetase short-chain family member 3	1.11264	2.068e-05	0.000218172
ENSMUSG00000029563	Foxp2	114142	forkhead box P2	1.11248	0.00072856	0.00412646
ENSMUSG00000025409	Mbd6	110962	methyl-CpG binding domain protein 6	1.11169	9.64024e-05	0.000771862
ENSMUSG00000043531	Sorcs1	58178	sortilin-related VPS10 domain containing receptor 1	1.11152	2.0367e-05	0.000215276
ENSMUSG00000030849	Fgfr2	14183	fibroblast growth factor receptor 2	1.11034	1.61105e-09	6.99621e-08
ENSMUSG00000039410	Prdm16	70673	PR domain containing 16	1.11032	1.45234e-06	2.329e-05
ENSMUSG00000029838	Ptn	19242	pleiotrophin	1.11018	3.35298e-19	1.08366e-16
ENSMUSG00000074166	AW146154	101835	expressed sequence AW146154	1.10962	0.000221041	0.00154784
ENSMUSG00000071317	Bves	23828	blood vessel epicardial substance	1.10676	0.00114919	0.0060524
ENSMUSG00000054640	Slc8a1	20541	solute carrier family 8 (sodium/calcium exchanger), member 1	1.1065	1.65631e-21	8.43513e-19
ENSMUSG00000027864	Ptgfrn	19221	prostaglandin F2 receptor negative regulator	1.10627	0.00184191	0.0088926
ENSMUSG00000036197	Gxylt1	223827	glucoside xylosyltransferase 1	1.10618	3.17348e-05	0.000308287
ENSMUSG00000000392	Fap	14089	fibroblast activation protein	1.10306	0.0112008	0.0375881
ENSMUSG00000034000	Neu4	241159	sialidase 4	1.10012	0.00281601	0.0125135
ENSMUSG00000018654	Ikzf1	22778	IKAROS family zinc finger 1	1.09975	0.00861058	0.0304403
ENSMUSG00000009291	Pttg1ip	108705	pituitary tumor-transforming 1 interacting protein	1.09939	1.23321e-06	2.03189e-05
ENSMUSG00000015568	Lpl	16956	lipoprotein lipase	1.09934	0.00029547	0.00197207
ENSMUSG00000070327	Rnf213	672511	ring finger protein 213	1.09909	0.0114954	0.0383772
ENSMUSG00000029307	Dmp1	13406	dentin matrix protein 1	1.09847	0.000668637	0.00385493
ENSMUSG00000041180	Hectd2	226098	HECT domain E3 ubiquitin protein ligase 2	1.0979	1.86772e-12	1.83561e-10
ENSMUSG00000022176	Rem2	140743	rad and gem related GTP binding protein 2	1.09711	7.25909e-05	0.000610897
ENSMUSG00000043065	Spice1	212514	spindle and centriole associated protein 1	1.09687	0.000136282	0.00102661
ENSMUSG00000041324	Inhba	16323	inhibin beta-A	1.0947	1.3769e-05	0.000155512
ENSMUSG00000038156	Spon1	233744	spondin 1, (f-spondin) extracellular matrix protein	1.09371	7.29688e-11	4.75435e-09
ENSMUSG00000032702	Kank1	107351	KN motif and ankyrin repeat domains 1	1.09343	2.79228e-05	0.000277019
ENSMUSG00000050530	Fam171a1	269233	family with sequence similarity 171, member A1	1.09107	8.85274e-10	4.13484e-08
ENSMUSG00000024548	Setbp1	240427	SET binding protein 1	1.0909	1.18236e-05	0.000137991
ENSMUSG00000052056	Zfp217	228913	zinc finger protein 217	1.09045	0.0120127	0.0397284
ENSMUSG00000040717	Il17rd	171463	interleukin 17 receptor D	1.08977	0.00769569	0.0278137
ENSMUSG00000041468	Gpr12	14738	G-protein coupled receptor 12	1.0893	2.37967e-07	5.17371e-06
ENSMUSG00000033486	Catsper2	212670	cation channel, sperm associated 2	1.08926	0.000791966	0.00443069
ENSMUSG00000029658	Wdr95	381693	WD40 repeat domain 95	1.08838	2.37161e-07	5.16286e-06
ENSMUSG00000006235	Epor	13857	erythropoietin receptor	1.08612	2.26439e-05	0.000234331
ENSMUSG00000025537	Phkg1	18682	phosphorylase kinase gamma 1	1.08582	0.000353724	0.0022829
ENSMUSG00000028019	Pdgfc	54635	platelet-derived growth factor, C polypeptide	1.08488	0.00180083	0.00873562
ENSMUSG00000094626	Tmem121b	94047	transmembrane protein 121B	1.08281	0.000443388	0.00272852
ENSMUSG00000032855	Pkd1	18763	polycystin 1, transient receptor poteintial channel interacting	1.08203	0.000296523	0.00197753
ENSMUSG00000049303	Syt12	171180	synaptotagmin XII	1.08184	0.000321432	0.00210604
ENSMUSG00000057286	St6galnac2	20446	ST6 (alpha-N-acetyl-neuraminyl-2,3-beta-galactosyl-1,3)-N-acetylgalactosaminide alpha-2,6-sialyltransferase 2	1.08179	0.0135391	0.0436482
ENSMUSG00000048355	Arxes1	76219	adipocyte-related X-chromosome expressed sequence 1	1.08102	9.19065e-05	0.000741517
ENSMUSG00000059810	Rgs3	50780	regulator of G-protein signaling 3	1.08079	0.0053165	0.0207258
ENSMUSG00000002732	Fkbp7	14231	FK506 binding protein 7	1.0799	0.0156691	0.0489381
ENSMUSG00000075571	Defb30	73670	defensin beta 30	1.07856	0.000910526	0.00497151
ENSMUSG00000030259	Rassf8	71323	Ras association (RalGDS/AF-6) domain family (N-terminal) member 8	1.07592	4.65087e-07	9.02569e-06
ENSMUSG00000037016	Frem2	242022	Fras1 related extracellular matrix protein 2	1.0748	0.0111521	0.0374619
ENSMUSG00000045107	Saysd1	67509	SAYSVFN motif domain containing 1	1.07407	0.000551849	0.00328529
ENSMUSG00000052914	Cyp2j6	13110	cytochrome P450, family 2, subfamily j, polypeptide 6	1.07279	3.54013e-06	5.01647e-05
ENSMUSG00000073414	Mpig6b	106722	megakaryocyte and platelet inhibitory receptor G6b	1.07139	4.61108e-05	0.00042162
ENSMUSG00000063632	Sox11	20666	SRY (sex determining region Y)-box 11	1.07106	2.95806e-08	8.61578e-07
ENSMUSG00000030930	Chst15	77590	carbohydrate sulfotransferase 15	1.06949	3.57019e-07	7.28283e-06
ENSMUSG00000012350	Ehf	13661	ets homologous factor	1.06944	1.37411e-05	0.000155302
ENSMUSG00000044056	Efcab9	69306	EF-hand calcium binding domain 9	1.06932	0.000663426	0.00383258
ENSMUSG00000038072	Galnt11	231050	polypeptide N-acetylgalactosaminyltransferase 11	1.06916	3.24187e-08	9.31331e-07
ENSMUSG00000071068	Treml2	328833	triggering receptor expressed on myeloid cells-like 2	1.0687	5.62868e-05	0.000494747
ENSMUSG00000045532	C1ql1	23829	complement component 1, q subcomponent-like 1	1.06771	0.00378423	0.0157889
ENSMUSG00000033060	Lmo7	380928	LIM domain only 7	1.06658	5.5332e-16	1.05672e-13
ENSMUSG00000063535	Zfp773	76373	zinc finger protein 773	1.06604	0.00607804	0.023126
ENSMUSG00000029761	Cald1	109624	caldesmon 1	1.06543	1.94141e-12	1.89693e-10
ENSMUSG00000009075	Cabp7	192650	calcium binding protein 7	1.06542	2.10386e-09	8.79538e-08
ENSMUSG00000079470	Utp14b	195434	UTP14B small subunit processome component	1.06453	3.46962e-05	0.000332442
ENSMUSG00000025645	Ccdc51	66658	coiled-coil domain containing 51	1.06278	0.0107885	0.0364592
ENSMUSG00000026276	Septin2	18000	septin 2	1.06137	0.00582926	0.0223464
ENSMUSG00000038132	Rbm24	666794	RNA binding motif protein 24	1.06123	2.53073e-09	1.02982e-07
ENSMUSG00000064325	Hhip	15245	Hedgehog-interacting protein	1.06046	0.000777305	0.00436027
ENSMUSG00000028873	Cdca8	52276	cell division cycle associated 8	1.05947	0.00070796	0.00403732
ENSMUSG00000006764	Tph2	216343	tryptophan hydroxylase 2	1.05936	0.0054216	0.0210477
ENSMUSG00000020604	Arsg	74008	arylsulfatase G	1.05899	0.00306416	0.0133583
ENSMUSG00000045466	Zfp956	101197	zinc finger protein 956	1.05812	0.000174324	0.00126171
ENSMUSG00000038119	Cdon	57810	cell adhesion molecule-related/down-regulated by oncogenes	1.05734	2.56042e-05	0.000258907
ENSMUSG00000039519	Cyp7b1	13123	cytochrome P450, family 7, subfamily b, polypeptide 1	1.05614	2.18331e-05	0.000227905
ENSMUSG00000027375	Mal	17153	myelin and lymphocyte protein, T cell differentiation protein	1.05577	1.30643e-07	3.06218e-06
ENSMUSG00000031232	Magt1	67075	magnesium transporter 1	1.05556	0.00332606	0.0142705
ENSMUSG00000020897	Aurkb	20877	aurora kinase B	1.05533	5.12191e-05	0.000458842
ENSMUSG00000021638	Ocln	18260	occludin	1.05493	0.00324201	0.0139777
ENSMUSG00000021379	Id4	15904	inhibitor of DNA binding 4	1.05446	4.56307e-13	5.43879e-11
ENSMUSG00000117286	Gm1043	381634	predicted gene 1043	1.05439	0.000355077	0.00228988
ENSMUSG00000038776	Ephx1	13849	epoxide hydrolase 1, microsomal	1.05295	0.000685018	0.00392872
ENSMUSG00000056854	Pou3f4	18994	POU domain, class 3, transcription factor 4	1.05276	0.00150645	0.00753507
ENSMUSG00000060002	Chpt1	212862	choline phosphotransferase 1	1.0514	1.42194e-07	3.28258e-06
ENSMUSG00000044496	2510039O18Rik	77034	RIKEN cDNA 2510039O18 gene	1.05098	0.000125673	0.000960029
ENSMUSG00000043301	Kcnj6	16522	potassium inwardly-rectifying channel, subfamily J, member 6	1.04817	2.22826e-06	3.3406e-05
ENSMUSG00000041235	Chd7	320790	chromodomain helicase DNA binding protein 7	1.04757	4.62061e-06	6.25233e-05
ENSMUSG00000028364	Tnc	21923	tenascin C	1.04675	0.0033229	0.0142643
ENSMUSG00000022802	Lmln	239833	leishmanolysin-like (metallopeptidase M8 family)	1.04648	0.00399615	0.0164525
ENSMUSG00000066258	Trim12a	76681	tripartite motif-containing 12A	1.04644	0.00684291	0.0253923
ENSMUSG00000053007	Creb5	231991	cAMP responsive element binding protein 5	1.04609	0.00642433	0.0241591
ENSMUSG00000071489	Ptgdr	19214	prostaglandin D receptor	1.04596	0.00760016	0.0275277
ENSMUSG00000045275	Lca5l	385668	Leber congenital amaurosis 5-like	1.04573	0.00209653	0.00986125
ENSMUSG00000042256	Ptchd4	627626	patched domain containing 4	1.04539	1.27899e-05	0.000147124
ENSMUSG00000035762	Tmem161b	72745	transmembrane protein 161B	1.04524	0.000512805	0.00309007
ENSMUSG00000005087	Cd44	12505	CD44 antigen	1.04509	0.00744001	0.0270408
ENSMUSG00000035476	Tab3	66724	TGF-beta activated kinase 1/MAP3K7 binding protein 3	1.04435	0.000738279	0.0041706
ENSMUSG00000038540	Tmc3	233424	transmembrane channel-like gene family 3	1.04387	0.000569949	0.00337749
ENSMUSG00000074968	Ano3	228432	anoctamin 3	1.04378	2.30787e-09	9.48313e-08
ENSMUSG00000023949	Tcte1	21645	t-complex-associated testis expressed 1	1.04342	0.00493674	0.0194758
ENSMUSG00000063415	Cyp26b1	232174	cytochrome P450, family 26, subfamily b, polypeptide 1	1.04335	6.12375e-10	2.98306e-08
ENSMUSG00000030220	Arhgdib	11857	Rho, GDP dissociation inhibitor (GDI) beta	1.04327	0.00687459	0.0254595
ENSMUSG00000094410	Zbed6	667118	zinc finger, BED type containing 6	1.04139	0.000196592	0.00139819
ENSMUSG00000049791	Fzd4	14366	frizzled class receptor 4	1.0411	0.00506778	0.0198993
ENSMUSG00000043923	Ccdc84	382073	coiled-coil domain containing 84	1.04043	0.000204091	0.00144116
ENSMUSG00000032434	Cmtm6	67213	CKLF-like MARVEL transmembrane domain containing 6	1.03782	0.000140485	0.0010512
ENSMUSG00000054146	Krt15	16665	keratin 15	1.03662	0.00130886	0.00671858
ENSMUSG00000047712	Ust	338362	uronyl-2-sulfotransferase	1.03544	7.76087e-12	6.57306e-10
ENSMUSG00000024033	Rsph1	22092	radial spoke head 1 homolog (Chlamydomonas)	1.03524	0.000146043	0.0010865
ENSMUSG00000048807	Slc35e4	103710	solute carrier family 35, member E4	1.03482	0.000976822	0.00527352
ENSMUSG00000030002	Dusp11	72102	dual specificity phosphatase 11 (RNA/RNP complex 1-interacting)	1.03431	0.00187774	0.00903962
ENSMUSG00000001670	Tat	234724	tyrosine aminotransferase	1.03323	3.7822e-07	7.63986e-06
ENSMUSG00000028438	Kif24	109242	kinesin family member 24	1.03109	0.012678	0.041488
ENSMUSG00000038843	Gcnt1	14537	glucosaminyl (N-acetyl) transferase 1, core 2	1.03081	0.00382804	0.0159253
ENSMUSG00000045573	Penk	18619	preproenkephalin	1.03079	0.00353974	0.0149658
ENSMUSG00000069911	Insyn2b	574403	inhibitory synaptic factor family member 2B	1.0297	0.000181956	0.00130961
ENSMUSG00000053091	Lins1	72635	lines homolog 1	1.02928	0.000685176	0.00392872
ENSMUSG00000049811	Fam161a	73873	family with sequence similarity 161, member A	1.02751	0.000592872	0.00348751
ENSMUSG00000005089	Slc1a2	20511	solute carrier family 1 (glial high affinity glutamate transporter), member 2	1.02747	6.84466e-14	1.00027e-11
ENSMUSG00000033306	Lpp	210126	LIM domain containing preferred translocation partner in lipoma	1.02742	1.93088e-09	8.20425e-08
ENSMUSG00000035933	Cog5	238123	component of oligomeric golgi complex 5	1.02626	8.8572e-10	4.13484e-08
ENSMUSG00000079235	Ccdc13	100502861	coiled-coil domain containing 13	1.02578	0.00749882	0.0272192
ENSMUSG00000045092	S1pr1	13609	sphingosine-1-phosphate receptor 1	1.02516	1.32313e-05	0.00015045
ENSMUSG00000045598	Zfp553	233887	zinc finger protein 553	1.0246	7.90237e-05	0.000653901
ENSMUSG00000102976	Zc3h11a	70579	zinc finger CCCH type containing 11A	1.02316	0.000625606	0.00365067
ENSMUSG00000019892	Lrriq1	74978	leucine-rich repeats and IQ motif containing 1	1.02194	9.85197e-05	0.000785447
ENSMUSG00000031274	Col4a5	12830	collagen, type IV, alpha 5	1.02156	3.67845e-05	0.000348872
ENSMUSG00000004891	Nes	18008	nestin	1.0209	0.00956371	0.0330784
ENSMUSG00000011256	Adam19	11492	a disintegrin and metallopeptidase domain 19 (meltrin beta)	1.01982	6.76074e-07	1.23123e-05
ENSMUSG00000030029	Lrig1	16206	leucine-rich repeats and immunoglobulin-like domains 1	1.01896	0.00133467	0.00682192
ENSMUSG00000034462	Pkd2	18764	polycystin 2, transient receptor potential cation channel	1.0187	6.52098e-09	2.35681e-07
ENSMUSG00000026632	Tatdn3	68972	TatD DNase domain containing 3	1.0162	0.00467074	0.0186497
ENSMUSG00000029204	Rhoh	74734	ras homolog family member H	1.01586	0.000268992	0.00182285
ENSMUSG00000027981	Rnpc3	67225	RNA-binding region (RNP1, RRM) containing 3	1.01432	2.20819e-07	4.83215e-06
ENSMUSG00000030641	Ddias	74041	DNA damage-induced apoptosis suppressor	1.01382	0.0146462	0.0464173
ENSMUSG00000031129	Slc9a9	331004	solute carrier family 9 (sodium/hydrogen exchanger), member 9	1.01303	0.00332216	0.0142643
ENSMUSG00000030887	Pdzd9	67983	PDZ domain containing 9	1.01261	0.00474348	0.0188831
ENSMUSG00000030154	Klrb1f	232408	killer cell lectin-like receptor subfamily B member 1F	1.012	0.000346116	0.00224069
ENSMUSG00000046080	Clec9a	232414	C-type lectin domain family 9, member a	1.01183	2.15831e-08	6.55923e-07
ENSMUSG00000034842	Art3	109979	ADP-ribosyltransferase 3	1.01167	0.00437752	0.0177402
ENSMUSG00000049281	Scn3b	235281	sodium channel, voltage-gated, type III, beta	1.01143	1.04807e-16	2.25819e-14
ENSMUSG00000041907	Gpr45	93690	G protein-coupled receptor 45	1.01107	0.000579697	0.00342319
ENSMUSG00000031465	Angpt2	11601	angiopoietin 2	1.01097	3.2513e-06	4.69291e-05
ENSMUSG00000024325	Ring1	19763	ring finger protein 1	1.01061	0.000318874	0.00209418
ENSMUSG00000029915	Clec5a	23845	C-type lectin domain family 5, member a	1.01045	0.000411576	0.00257171
ENSMUSG00000050240	Hic2	58180	hypermethylated in cancer 2	1.00939	0.00127731	0.00658886
ENSMUSG00000032849	Abcc4	239273	ATP-binding cassette, sub-family C (CFTR/MRP), member 4	1.00873	0.00041483	0.00258592
ENSMUSG00000053062	Jam2	67374	junction adhesion molecule 2	1.00861	4.07773e-06	5.66366e-05
ENSMUSG00000052387	Trpm3	226025	transient receptor potential cation channel, subfamily M, member 3	1.00835	1.03573e-06	1.76179e-05
ENSMUSG00000046056	Sbsn	282619	suprabasin	1.00835	0.00018677	0.00133625
ENSMUSG00000058246	Gm10037	102637366	predicted gene 10037	1.00809	0.000644863	0.00374907
ENSMUSG00000024743	Syt7	54525	synaptotagmin VII	1.00807	1.53243e-11	1.22057e-09
ENSMUSG00000030209	Grin2b	14812	glutamate receptor, ionotropic, NMDA2B (epsilon 2)	1.00705	5.2102e-25	4.37813e-22
ENSMUSG00000026348	Acmsd	266645	amino carboxymuconate semialdehyde decarboxylase	1.00596	1.00622e-09	4.62035e-08
ENSMUSG00000015354	Pcolce2	76477	procollagen C-endopeptidase enhancer 2	1.00575	0.00352869	0.0149228
ENSMUSG00000034731	Dgkh	380921	diacylglycerol kinase, eta	1.00308	8.79655e-17	1.91993e-14
ENSMUSG00000042903	Foxo4	54601	forkhead box O4	1.00276	0.00538198	0.020918
ENSMUSG00000030309	Caprin2	232560	caprin family member 2	1.00241	0.000176706	0.00127565
ENSMUSG00000030722	Nfatc2ip	18020	nuclear factor of activated T cells, cytoplasmic, calcineurin dependent 2 interacting protein	1.00236	0.00250028	0.0113782
ENSMUSG00000023935	Spats1	71020	spermatogenesis associated, serine-rich 1	1.00025	0.00133262	0.00681349
ENSMUSG00000074918	Inafm2	100043272	InaF motif containing 2	0.999481	5.68673e-15	9.4625e-13
ENSMUSG00000064202	4430402I18Rik	381218	RIKEN cDNA 4430402I18 gene	0.998048	0.00277195	0.0123503
ENSMUSG00000050600	Zfp831	100043757	zinc finger protein 831	0.996731	8.33921e-05	0.000682321
ENSMUSG00000023232	Serinc2	230779	serine incorporator 2	0.995409	0.000262936	0.00179048
ENSMUSG00000062949	Atp11c	320940	ATPase, class VI, type 11C	0.994263	0.000825982	0.00459195
ENSMUSG00000022519	Srl	106393	sarcalumenin	0.993318	3.48617e-05	0.000333838
ENSMUSG00000050199	Lgr4	107515	leucine-rich repeat-containing G protein-coupled receptor 4	0.993178	0.000276974	0.00186416
ENSMUSG00000044345	Marveld1	277010	MARVEL (membrane-associating) domain containing 1	0.990772	0.000371305	0.00236998
ENSMUSG00000031375	Bgn	12111	biglycan	0.989536	0.00345607	0.0146809
ENSMUSG00000032515	Csrnp1	215418	cysteine-serine-rich nuclear protein 1	0.989357	0.0107276	0.0362824
ENSMUSG00000045062	Pcdhb7	93878	protocadherin beta 7	0.988991	0.0135173	0.0436064
ENSMUSG00000054764	Mtnr1a	17773	melatonin receptor 1A	0.988562	4.88956e-05	0.000441876
ENSMUSG00000043448	Gjc2	118454	gap junction protein, gamma 2	0.988084	0.00112039	0.0059193
ENSMUSG00000029913	Prdm5	70779	PR domain containing 5	0.987798	2.25828e-05	0.000233987
ENSMUSG00000001763	Tspan33	232670	tetraspanin 33	0.987484	0.00123598	0.00642297
ENSMUSG00000029090	Adgra3	70693	adhesion G protein-coupled receptor A3	0.987303	0.00137608	0.00698053
ENSMUSG00000058488	Kl	16591	klotho	0.987048	0.00145683	0.00734138
ENSMUSG00000046020	Pofut1	140484	protein O-fucosyltransferase 1	0.986633	0.0062397	0.0236181
ENSMUSG00000050505	Pcdh20	219257	protocadherin 20	0.985816	1.36827e-13	1.83962e-11
ENSMUSG00000055296	Tmem245	242474	transmembrane protein 245	0.984591	3.67405e-05	0.000348686
ENSMUSG00000049092	Gpr137c	70713	G protein-coupled receptor 137C	0.983614	1.84846e-08	5.78497e-07
ENSMUSG00000068335	Dok1	13448	docking protein 1	0.983006	4.93235e-06	6.60481e-05
ENSMUSG00000037166	Ppp1r14a	68458	protein phosphatase 1, regulatory inhibitor subunit 14A	0.982699	0.0150049	0.0472675
ENSMUSG00000074283	Zfp109	56869	zinc finger protein 109	0.982015	0.000223082	0.00155759
ENSMUSG00000035189	Ano4	320091	anoctamin 4	0.981914	0.00018973	0.00135466
ENSMUSG00000020890	Gucy2e	14919	guanylate cyclase 2e	0.980094	0.00663261	0.0247651
ENSMUSG00000032374	Plod2	26432	procollagen lysine, 2-oxoglutarate 5-dioxygenase 2	0.979956	0.00347994	0.0147612
ENSMUSG00000039328	Rnf122	68867	ring finger protein 122	0.979582	0.00159287	0.00788969
ENSMUSG00000017009	Sdc4	20971	syndecan 4	0.97946	1.42678e-05	0.000160498
ENSMUSG00000102752	Gm7694	665574	predicted gene 7694	0.979073	0.00125962	0.00651758
ENSMUSG00000063428	Ddo	70503	D-aspartate oxidase	0.978186	2.70073e-06	3.97795e-05
ENSMUSG00000031986	Sprtn	244666	SprT-like N-terminal domain	0.978099	0.00157999	0.00784674
ENSMUSG00000042228	Lyn	17096	LYN proto-oncogene, Src family tyrosine kinase	0.976742	0.0128591	0.0419551
ENSMUSG00000021207	Akr1c21	77337	aldo-keto reductase family 1, member C21	0.975831	0.00180904	0.00876664
ENSMUSG00000086596	Susd5	382111	sushi domain containing 5	0.975374	7.3933e-05	0.000618868
ENSMUSG00000036760	Kcnk9	223604	potassium channel, subfamily K, member 9	0.975036	7.26079e-11	4.75435e-09
ENSMUSG00000024565	Sall3	20689	spalt like transcription factor 3	0.974638	0.00915997	0.031925
ENSMUSG00000064115	Cadm2	239857	cell adhesion molecule 2	0.974558	1.61282e-13	2.1017e-11
ENSMUSG00000040985	Sun3	194974	Sad1 and UNC84 domain containing 3	0.974382	8.38363e-05	0.000685288
ENSMUSG00000032014	Oaf	102644	out at first homolog	0.973997	0.00107697	0.00571505
ENSMUSG00000043873	Chil5	229687	chitinase-like 5	0.973684	2.18582e-06	3.28577e-05
ENSMUSG00000034959	Rubcnl	271221	RUN and cysteine rich domain containing beclin 1 interacting protein like	0.973581	0.000391264	0.00246461
ENSMUSG00000025077	Dclre1a	55947	DNA cross-link repair 1A	0.972016	0.0150681	0.047431
ENSMUSG00000040562	Gstm2	14863	glutathione S-transferase, mu 2	0.969503	0.001665	0.00818167
ENSMUSG00000036264	Fstl4	320027	follistatin-like 4	0.968777	4.60429e-06	6.24534e-05
ENSMUSG00000040836	Gpr161	240888	G protein-coupled receptor 161	0.965727	8.98874e-09	3.12764e-07
ENSMUSG00000067649	Mageb18	215641	melanoma antigen family B, 18	0.965581	1.38473e-05	0.000156186
ENSMUSG00000000416	Cttnbp2	30785	cortactin binding protein 2	0.964845	1.10084e-13	1.55468e-11
ENSMUSG00000035818	Plekhs1	226245	pleckstrin homology domain containing, family S member 1	0.963057	0.00162018	0.00799669
ENSMUSG00000020576	Nbas	71169	neuroblastoma amplified sequence	0.962867	2.14483e-06	3.23864e-05
ENSMUSG00000032475	Nck1	17973	non-catalytic region of tyrosine kinase adaptor protein 1	0.962046	2.73103e-05	0.000272067
ENSMUSG00000033589	Reep4	72549	receptor accessory protein 4	0.962028	3.46812e-06	4.931e-05
ENSMUSG00000032415	Ube2cbp	70348	ubiquitin-conjugating enzyme E2C binding protein	0.961719	0.000759606	0.00427383
ENSMUSG00000019996	Map7	17761	microtubule-associated protein 7	0.961643	2.99698e-10	1.60405e-08
ENSMUSG00000027242	Wdr76	241627	WD repeat domain 76	0.959549	0.00443886	0.0179695
ENSMUSG00000020334	Slc22a4	30805	solute carrier family 22 (organic cation transporter), member 4	0.959063	0.00142494	0.00719796
ENSMUSG00000038642	Ctss	13040	cathepsin S	0.958192	1.44756e-06	2.32357e-05
ENSMUSG00000024887	Asah2	54447	N-acylsphingosine amidohydrolase 2	0.957742	0.00583581	0.0223575
ENSMUSG00000073664	Nbeal1	269198	neurobeachin like 1	0.957099	8.06355e-07	1.41742e-05
ENSMUSG00000029287	Tgfbr3	21814	transforming growth factor, beta receptor III	0.954184	0.000964998	0.00521975
ENSMUSG00000042540	Acot5	217698	acyl-CoA thioesterase 5	0.954055	0.0156343	0.0488566
ENSMUSG00000031230	Fgf16	80903	fibroblast growth factor 16	0.953838	0.00140862	0.00712835
ENSMUSG00000074743	Thbd	21824	thrombomodulin	0.952154	0.000600006	0.00352518
ENSMUSG00000043964	Orai3	269999	ORAI calcium release-activated calcium modulator 3	0.951472	4.22742e-06	5.8378e-05
ENSMUSG00000049115	Agtr1a	11607	angiotensin II receptor, type 1a	0.949749	0.00536699	0.0208742
ENSMUSG00000054404	Slfn5	327978	schlafen 5	0.94968	0.00252412	0.0114619
ENSMUSG00000044950	Pwwp2a	70802	PWWP domain containing 2A	0.947551	4.4903e-08	1.22905e-06
ENSMUSG00000003934	Efnb3	13643	ephrin B3	0.947541	1.97882e-08	6.07921e-07
ENSMUSG00000049160	Tex50	100502590	testis expressed 50	0.947407	0.00121203	0.00632592
ENSMUSG00000025809	Itgb1	16412	integrin beta 1 (fibronectin receptor beta)	0.946669	0.000564101	0.00334992
ENSMUSG00000058979	Hdhd5	214932	haloacid dehalogenase like hydrolase domain containing 5	0.946589	0.0132794	0.0430422
ENSMUSG00000037242	Clic4	29876	chloride intracellular channel 4 (mitochondrial)	0.9465	6.95901e-06	8.79347e-05
ENSMUSG00000030889	Vwa3a	233813	von Willebrand factor A domain containing 3A	0.946194	0.000636065	0.0037027
ENSMUSG00000038738	Shank1	243961	SH3 and multiple ankyrin repeat domains 1	0.945946	1.27224e-09	5.65644e-08
ENSMUSG00000040721	Zfhx2	239102	zinc finger homeobox 2	0.945797	1.20401e-05	0.000139838
ENSMUSG00000021763	Cspg4b	408066	chondroitin sulfate proteoglycan 4B	0.945458	3.36535e-05	0.000323374
ENSMUSG00000051149	Adnp	11538	activity-dependent neuroprotective protein	0.945438	3.23525e-06	4.67914e-05
ENSMUSG00000024299	Adamts10	224697	a disintegrin-like and metallopeptidase (reprolysin type) with thrombospondin type 1 motif, 10	0.944956	0.00165859	0.00815513
ENSMUSG00000049583	Grm5	108071	glutamate receptor, metabotropic 5	0.944849	7.54897e-12	6.44e-10
ENSMUSG00000019873	Reep3	28193	receptor accessory protein 3	0.944466	0.000854592	0.00472599
ENSMUSG00000022311	Csmd3	239420	CUB and Sushi multiple domains 3	0.944074	3.14561e-05	0.000306109
ENSMUSG00000026034	Clk1	12747	CDC-like kinase 1	0.941759	6.17335e-06	7.96234e-05
ENSMUSG00000015647	Lama5	16776	laminin, alpha 5	0.941104	0.00426356	0.0173676
ENSMUSG00000036459	Wtip	101543	WT1-interacting protein	0.940787	0.0108968	0.0367422
ENSMUSG00000026830	Ermn	77767	ermin, ERM-like protein	0.93982	8.60336e-13	9.46519e-11
ENSMUSG00000028211	Trp53inp1	60599	transformation related protein 53 inducible nuclear protein 1	0.939768	6.91076e-09	2.46587e-07
ENSMUSG00000005131	4930550C14Rik	75311	RIKEN cDNA 4930550C14 gene	0.939697	7.64671e-08	1.91807e-06
ENSMUSG00000021578	Ccdc127	67433	coiled-coil domain containing 127	0.939411	6.52466e-06	8.326e-05
ENSMUSG00000024900	Cpt1a	12894	carnitine palmitoyltransferase 1a, liver	0.939373	0.000111599	0.000868706
ENSMUSG00000047909	Ankrd16	320816	ankyrin repeat domain 16	0.939308	0.0152587	0.0479145
ENSMUSG00000016262	Sertad4	214791	SERTA domain containing 4	0.939212	5.24544e-06	6.94679e-05
ENSMUSG00000021590	Spata9	75571	spermatogenesis associated 9	0.939135	0.00187365	0.00902942
ENSMUSG00000002227	Mov10	17454	Mov10 RISC complex RNA helicase	0.93789	0.011882	0.0394254
ENSMUSG00000038702	Dsel	319901	dermatan sulfate epimerase-like	0.937811	6.57982e-08	1.68825e-06
ENSMUSG00000027971	Ndst4	64580	N-deacetylase/N-sulfotransferase (heparin glucosaminyl) 4	0.93684	2.66386e-08	7.86797e-07
ENSMUSG00000007646	Rad51c	114714	RAD51 paralog C	0.936655	0.00101828	0.00545009
ENSMUSG00000031298	Adgrg2	237175	adhesion G protein-coupled receptor G2	0.934727	0.00201148	0.00955482
ENSMUSG00000025314	Ptprj	19271	protein tyrosine phosphatase, receptor type, J	0.932387	2.64584e-12	2.49809e-10
ENSMUSG00000021823	Vcl	22330	vinculin	0.932254	0.00298162	0.0130663
ENSMUSG00000033458	Fan1	330554	FANCD2/FANCI-associated nuclease 1	0.931588	0.0043182	0.0175548
ENSMUSG00000031385	Plxnb3	140571	plexin B3	0.931097	0.00855938	0.0303095
ENSMUSG00000033342	Plppr5	75769	phospholipid phosphatase related 5	0.930544	3.59812e-06	5.08578e-05
ENSMUSG00000031925	Maml2	270118	mastermind like transcriptional coactivator 2	0.929255	8.05099e-07	1.41681e-05
ENSMUSG00000020774	Aspa	11484	aspartoacylase	0.929049	2.38034e-05	0.000243186
ENSMUSG00000045312	Lhfpl2	218454	lipoma HMGIC fusion partner-like 2	0.927711	2.37937e-05	0.000243186
ENSMUSG00000004677	Myo9b	17925	myosin IXb	0.927629	0.00636367	0.0239578
ENSMUSG00000051242	Pcdhb9	93880	protocadherin beta 9	0.926945	0.0127081	0.0415632
ENSMUSG00000047281	Sfn	55948	stratifin	0.926378	0.00334155	0.0143224
ENSMUSG00000039943	Plcb4	18798	phospholipase C, beta 4	0.92571	2.53072e-11	1.89872e-09
ENSMUSG00000103088	Pcdhgb6	93703	protocadherin gamma subfamily B, 6	0.925486	0.00155854	0.00775166
ENSMUSG00000018983	E2f2	242705	E2F transcription factor 2	0.925458	0.000392665	0.00246974
ENSMUSG00000060548	Tnfrsf19	29820	tumor necrosis factor receptor superfamily, member 19	0.924055	0.000664694	0.00383746
ENSMUSG00000037625	Cldn11	18417	claudin 11	0.921919	0.000118932	0.000916451
ENSMUSG00000042102	Dmgdh	74129	dimethylglycine dehydrogenase precursor	0.92191	0.00866575	0.0305766
ENSMUSG00000030693	Klk10	69540	kallikrein related-peptidase 10	0.920514	0.0013042	0.00670488
ENSMUSG00000052273	Dnah3	381917	dynein, axonemal, heavy chain 3	0.920222	0.00593988	0.0226825
ENSMUSG00000035179	Ppp1r32	67752	protein phosphatase 1, regulatory subunit 32	0.919612	6.57857e-05	0.000562357
ENSMUSG00000028331	Trmo	74753	tRNA methyltransferase O	0.918368	0.00335154	0.0143615
ENSMUSG00000074736	Syndig1	433485	synapse differentiation inducing 1	0.916116	0.000187437	0.00134045
ENSMUSG00000029816	Gpnmb	93695	glycoprotein (transmembrane) nmb	0.915915	0.00200054	0.00951361
ENSMUSG00000026824	Kcnj3	16519	potassium inwardly-rectifying channel, subfamily J, member 3	0.915597	5.68785e-10	2.79503e-08
ENSMUSG00000063362	Alg11	207958	asparagine-linked glycosylation 11 (alpha-1,2-mannosyltransferase)	0.915018	0.000563743	0.00334898
ENSMUSG00000032558	Nphp3	74025	nephronophthisis 3 (adolescent)	0.914419	0.00742652	0.0269977
ENSMUSG00000031381	Piga	18700	phosphatidylinositol glycan anchor biosynthesis, class A	0.913019	3.3025e-05	0.000318609
ENSMUSG00000038637	Lrrc56	70552	leucine rich repeat containing 56	0.912874	0.00213132	0.00999412
ENSMUSG00000025094	Slc18a2	214084	solute carrier family 18 (vesicular monoamine), member 2	0.912764	0.000205145	0.00144799
ENSMUSG00000047976	Kcna1	16485	potassium voltage-gated channel, shaker-related subfamily, member 1	0.912096	9.73515e-08	2.36722e-06
ENSMUSG00000026307	Scly	50880	selenocysteine lyase	0.911554	4.14225e-05	0.000384611
ENSMUSG00000035545	Leng8	232798	leukocyte receptor cluster (LRC) member 8	0.911109	0.0117521	0.0390558
ENSMUSG00000033159	Cnppd1	69171	cyclin Pas1/PHO80 domain containing 1	0.910535	0.0135746	0.0437451
ENSMUSG00000024542	Cep192	70799	centrosomal protein 192	0.910504	0.0158111	0.049235
ENSMUSG00000071855	Ccdc112	240261	coiled-coil domain containing 112	0.910109	0.00021011	0.00147993
ENSMUSG00000031090	Nadsyn1	78914	NAD synthetase 1	0.909626	0.0100645	0.0344347
ENSMUSG00000053414	Hunk	26559	hormonally upregulated Neu-associated kinase	0.90914	7.28777e-06	9.11297e-05
ENSMUSG00000044708	Kcnj10	16513	potassium inwardly-rectifying channel, subfamily J, member 10	0.908812	1.61357e-05	0.000178288
ENSMUSG00000017734	Dbndd2	52840	dysbindin (dystrobrevin binding protein 1) domain containing 2	0.908347	1.08839e-08	3.71025e-07
ENSMUSG00000046387	Pcdhb17	93888	protocadherin beta 17	0.908284	0.000600608	0.00352561
ENSMUSG00000019813	Cep57l1	103268	centrosomal protein 57-like 1	0.908218	0.00203857	0.00965585
ENSMUSG00000021313	Ryr2	20191	ryanodine receptor 2, cardiac	0.907494	8.71993e-15	1.42279e-12
ENSMUSG00000029313	Aff1	17355	AF4/FMR2 family, member 1	0.907042	0.0004363	0.00269662
ENSMUSG00000029263	Pigg	433931	phosphatidylinositol glycan anchor biosynthesis, class G	0.906587	0.00272377	0.0121809
ENSMUSG00000045915	Ccdc42	276920	coiled-coil domain containing 42	0.906537	0.000164845	0.00120138
ENSMUSG00000031538	Plat	18791	plasminogen activator, tissue	0.906093	0.000660985	0.00382333
ENSMUSG00000022286	Grhl2	252973	grainyhead like transcription factor 2	0.904141	1.14294e-05	0.000134136
ENSMUSG00000026322	Htr4	15562	5 hydroxytryptamine (serotonin) receptor 4	0.903006	0.00391744	0.0161943
ENSMUSG00000038393	Txnip	56338	thioredoxin interacting protein	0.902715	0.0122597	0.0403745
ENSMUSG00000030757	Zkscan2	210162	zinc finger with KRAB and SCAN domains 2	0.902691	0.000164209	0.00119778
ENSMUSG00000027715	Ccna2	12428	cyclin A2	0.902261	0.00229956	0.0106435
ENSMUSG00000048794	Cfap100	243538	cilia and flagella associated protein 100	0.901141	0.00617444	0.0234239
ENSMUSG00000021242	Npc2	67963	NPC intracellular cholesterol transporter 2	0.899903	3.88259e-05	0.000364326
ENSMUSG00000047554	Tmem41b	233724	transmembrane protein 41B	0.899298	3.43209e-06	4.8924e-05
ENSMUSG00000030203	Dusp16	70686	dual specificity phosphatase 16	0.899096	4.29685e-06	5.90457e-05
ENSMUSG00000072707	Olfr31	18330	olfactory receptor 31	0.89876	1.89674e-05	0.000203554
ENSMUSG00000055538	Zcchc24	71918	zinc finger, CCHC domain containing 24	0.895588	1.82661e-07	4.05522e-06
ENSMUSG00000052581	Lrrtm4	243499	leucine rich repeat transmembrane neuronal 4	0.894695	2.4835e-07	5.35596e-06
ENSMUSG00000033880	Lgals3bp	19039	lectin, galactoside-binding, soluble, 3 binding protein	0.89307	0.00862299	0.0304706
ENSMUSG00000060802	B2m	12010	beta-2 microglobulin	0.892151	0.000179036	0.00129081
ENSMUSG00000073077	Cfap47	636104	cilia and flagella associated protein 47	0.891909	0.0117788	0.0391293
ENSMUSG00000035283	Adrb1	11554	adrenergic receptor, beta 1	0.891848	0.00354909	0.0150015
ENSMUSG00000019943	Atp2b1	67972	ATPase, Ca++ transporting, plasma membrane 1	0.891003	1.0759e-16	2.2888e-14
ENSMUSG00000053395	Cacng8	81905	calcium channel, voltage-dependent, gamma subunit 8	0.890154	0.00433697	0.0176141
ENSMUSG00000021738	Atxn7	246103	ataxin 7	0.889052	9.01011e-10	4.19457e-08
ENSMUSG00000042246	Tmc7	209760	transmembrane channel-like gene family 7	0.888821	0.000376931	0.00239227
ENSMUSG00000028642	Tmem269	75180	transmembrane protein 269	0.888618	1.29318e-06	2.11207e-05
ENSMUSG00000047638	Nr1h4	20186	nuclear receptor subfamily 1, group H, member 4	0.888054	0.00270978	0.0121345
ENSMUSG00000029193	Cckar	12425	cholecystokinin A receptor	0.888	1.58943e-05	0.000176298
ENSMUSG00000078137	Ankrd63	383787	ankyrin repeat domain 63	0.885984	0.00104591	0.00557308
ENSMUSG00000026483	Niban1	63913	niban apoptosis regulator 1	0.885412	0.00154707	0.0077037
ENSMUSG00000040234	Tm7sf3	67623	transmembrane 7 superfamily member 3	0.884655	0.000390866	0.00246303
ENSMUSG00000053550	Shisa7	232813	shisa family member 7	0.88432	1.17626e-07	2.79212e-06
ENSMUSG00000030530	Furin	18550	furin (paired basic amino acid cleaving enzyme)	0.884197	5.93818e-06	7.72423e-05
ENSMUSG00000057337	Chst3	53374	carbohydrate sulfotransferase 3	0.884164	0.000437324	0.00270109
ENSMUSG00000021614	Vcan	13003	versican	0.883173	0.000468382	0.00286554
ENSMUSG00000090290	Tarbp1	212728	TAR RNA binding protein 1	0.882963	0.00121302	0.0063291
ENSMUSG00000043467	Zbtb37	240869	zinc finger and BTB domain containing 37	0.882232	4.17211e-07	8.288e-06
ENSMUSG00000052512	Nav2	78286	neuron navigator 2	0.881645	8.31768e-13	9.25742e-11
ENSMUSG00000071341	Egr4	13656	early growth response 4	0.881489	0.00476549	0.0189559
ENSMUSG00000033569	Adgrb3	210933	adhesion G protein-coupled receptor B3	0.881364	1.21996e-10	7.56557e-09
ENSMUSG00000068859	Sp9	381373	trans-acting transcription factor 9	0.880508	0.00924285	0.0321692
ENSMUSG00000042622	Maff	17133	v-maf musculoaponeurotic fibrosarcoma oncogene family, protein F (avian)	0.880358	0.00171178	0.0083677
ENSMUSG00000049252	Lrp1b	94217	low density lipoprotein-related protein 1B	0.879916	4.89663e-09	1.82467e-07
ENSMUSG00000078789	Dph1	116905	diphthamide biosynthesis 1	0.878946	0.00278772	0.0124074
ENSMUSG00000027315	Spint1	20732	serine protease inhibitor, Kunitz type 1	0.878914	0.00117949	0.00617329
ENSMUSG00000002028	Kmt2a	214162	lysine (K)-specific methyltransferase 2A	0.878502	9.76129e-08	2.36722e-06
ENSMUSG00000039110	Mycbpap	104601	MYCBP associated protein	0.877706	0.00968357	0.0334173
ENSMUSG00000021556	Golm1	105348	golgi membrane protein 1	0.876291	0.00110972	0.00587032
ENSMUSG00000034055	Phka1	18679	phosphorylase kinase alpha 1	0.876176	0.000713122	0.00405987
ENSMUSG00000034903	Cobll1	319876	Cobl-like 1	0.875426	4.96883e-05	0.000447754
ENSMUSG00000021458	Aopep	72061	aminopeptidase O	0.874918	0.00234223	0.0108023
ENSMUSG00000059187	Tafa1	320265	TAFA chemokine like family member 1	0.871625	1.47202e-06	2.3528e-05
ENSMUSG00000057137	Tmem140	68487	transmembrane protein 140	0.871537	0.0025926	0.0117064
ENSMUSG00000070336	Fbxo47	72973	F-box protein 47	0.870577	0.00320876	0.0138557
ENSMUSG00000060924	Csmd1	94109	CUB and Sushi multiple domains 1	0.869846	2.32049e-05	0.000238798
ENSMUSG00000071637	Cebpd	12609	CCAAT/enhancer binding protein (C/EBP), delta	0.869637	0.00126486	0.00654149
ENSMUSG00000036291	Ap5m1	74385	adaptor-related protein complex 5, mu 1 subunit	0.869173	0.000120512	0.000926501
ENSMUSG00000029925	Tbxas1	21391	thromboxane A synthase 1, platelet	0.868597	0.00123699	0.00642427
ENSMUSG00000026235	Epha4	13838	Eph receptor A4	0.868167	1.2746e-17	3.19714e-15
ENSMUSG00000032661	Oas3	246727	2'-5' oligoadenylate synthetase 3	0.868135	1.19752e-05	0.000139181
ENSMUSG00000033416	Gucd1	68778	guanylyl cyclase domain containing 1	0.86745	0.00118466	0.00619651
ENSMUSG00000026436	Elk4	13714	ELK4, member of ETS oncogene family	0.866837	9.22558e-09	3.19681e-07
ENSMUSG00000025534	Gusb	110006	glucuronidase, beta	0.866773	0.00166922	0.00819782
ENSMUSG00000048572	Tmem252	226040	transmembrane protein 252	0.866399	0.00381168	0.0158719
ENSMUSG00000024566	Atp9b	50771	ATPase, class II, type 9B	0.866183	0.000107736	0.000841757
ENSMUSG00000018845	Unc45b	217012	unc-45 myosin chaperone B	0.866037	0.000189745	0.00135466
ENSMUSG00000020275	Rel	19696	reticuloendotheliosis oncogene	0.865894	0.00709513	0.0260579
ENSMUSG00000049184	Purg	75029	purine-rich element binding protein G	0.865358	4.38158e-07	8.64257e-06
ENSMUSG00000027400	Pdyn	18610	prodynorphin	0.864449	0.00797916	0.0285984
ENSMUSG00000036896	C1qc	12262	complement component 1, q subcomponent, C chain	0.864211	0.00885105	0.0310674
ENSMUSG00000021252	Erg28	58520	ergosterol biosynthesis 28	0.863916	0.000522412	0.00313559
ENSMUSG00000047719	Ubiad1	71707	UbiA prenyltransferase domain containing 1	0.863883	0.00374681	0.0156639
ENSMUSG00000027956	Tmem144	70652	transmembrane protein 144	0.863773	0.00549343	0.0212529
ENSMUSG00000039637	Coro7	78885	coronin 7	0.86328	0.000432853	0.00268432
ENSMUSG00000021541	Trpc7	26946	transient receptor potential cation channel, subfamily C, member 7	0.863052	0.00433217	0.0175989
ENSMUSG00000039158	Akna	100182	AT-hook transcription factor	0.862762	0.0012406	0.00644102
ENSMUSG00000002489	Tiam1	21844	T cell lymphoma invasion and metastasis 1	0.862745	1.12016e-10	6.9983e-09
ENSMUSG00000036242	Armh4	67419	armadillo-like helical domain containing 4	0.862546	1.74281e-05	0.000190122
ENSMUSG00000037681	Esyt3	272636	extended synaptotagmin-like protein 3	0.861967	0.000184686	0.00132416
ENSMUSG00000020781	Tsen54	76265	tRNA splicing endonuclease subunit 54	0.859708	0.00832684	0.0296234
ENSMUSG00000039153	Runx2	12393	runt related transcription factor 2	0.85915	0.00039142	0.00246467
ENSMUSG00000029134	Plb1	665270	phospholipase B1	0.858492	0.000490369	0.0029816
ENSMUSG00000029765	Plxna4	243743	plexin A4	0.858374	2.4036e-14	3.70595e-12
ENSMUSG00000044042	Fmn1	14260	formin 1	0.858082	3.26937e-05	0.000315776
ENSMUSG00000020037	Rfx4	71137	regulatory factor X, 4 (influences HLA class II expression)	0.857224	0.0122576	0.0403745
ENSMUSG00000025348	Itga7	16404	integrin alpha 7	0.856864	0.0125997	0.0412768
ENSMUSG00000041936	Agrn	11603	agrin	0.855875	3.51855e-05	0.000336364
ENSMUSG00000036306	Lzts1	211134	leucine zipper, putative tumor suppressor 1	0.855333	1.30856e-06	2.13305e-05
ENSMUSG00000026344	Lypd1	72585	Ly6/Plaur domain containing 1	0.854602	1.48888e-06	2.37402e-05
ENSMUSG00000028082	Sh3d19	27059	SH3 domain protein D19	0.854054	4.38659e-07	8.64257e-06
ENSMUSG00000022623	Shank3	58234	SH3 and multiple ankyrin repeat domains 3	0.852965	0.00015565	0.0011458
ENSMUSG00000057191	AB124611	382062	cDNA sequence AB124611	0.852502	8.77431e-05	0.000714443
ENSMUSG00000022817	Itgb5	16419	integrin beta 5	0.851772	0.00464105	0.0185444
ENSMUSG00000030317	Timp4	110595	tissue inhibitor of metalloproteinase 4	0.849063	0.0119925	0.0396899
ENSMUSG00000069895	Atxn1l	52335	ataxin 1-like	0.848946	2.41694e-08	7.21079e-07
ENSMUSG00000074340	Ovgp1	12659	oviductal glycoprotein 1	0.847901	0.00105146	0.00560007
ENSMUSG00000020697	Lig3	16882	ligase III, DNA, ATP-dependent	0.847705	0.00342318	0.0145793
ENSMUSG00000095061	E030018B13Rik	381994	RIKEN cDNA E030018B13 gene	0.847497	7.99865e-09	2.81814e-07
ENSMUSG00000060771	Tsga10	211484	testis specific 10	0.847312	5.0788e-07	9.72145e-06
ENSMUSG00000024972	Lgals12	56072	lectin, galactose binding, soluble 12	0.846851	3.90097e-07	7.84207e-06
ENSMUSG00000025813	Homer2	26557	homer scaffolding protein 2	0.846483	3.8447e-12	3.4553e-10
ENSMUSG00000030660	Pik3c2a	18704	phosphatidylinositol-4-phosphate 3-kinase catalytic subunit type 2 alpha	0.846371	5.63272e-07	1.05533e-05
ENSMUSG00000021240	Abcd4	19300	ATP-binding cassette, sub-family D (ALD), member 4	0.84586	0.00462884	0.0185132
ENSMUSG00000032517	Mobp	17433	myelin-associated oligodendrocytic basic protein	0.845743	4.56533e-07	8.90081e-06
ENSMUSG00000060176	Kif27	75050	kinesin family member 27	0.845717	0.00291323	0.0128605
ENSMUSG00000036949	Slc39a12	277468	solute carrier family 39 (zinc transporter), member 12	0.845576	0.00818533	0.0292127
ENSMUSG00000028476	Reck	53614	reversion-inducing-cysteine-rich protein with kazal motifs	0.845517	0.0140748	0.044946
ENSMUSG00000053279	Aldh1a1	11668	aldehyde dehydrogenase family 1, subfamily A1	0.845386	0.000114283	0.000886484
ENSMUSG00000024645	Timm21	67105	translocase of inner mitochondrial membrane 21	0.844876	0.0156907	0.0489782
ENSMUSG00000026278	Bok	51800	BCL2-related ovarian killer	0.844689	6.13326e-09	2.22829e-07
ENSMUSG00000053110	Yap1	22601	yes-associated protein 1	0.844007	0.000220334	0.00154482
ENSMUSG00000030020	Prickle2	243548	prickle planar cell polarity protein 2	0.843684	1.11655e-12	1.19521e-10
ENSMUSG00000028865	Cd164l2	69655	CD164 sialomucin-like 2	0.843608	0.00812838	0.0290465
ENSMUSG00000023088	Abcc1	17250	ATP-binding cassette, sub-family C (CFTR/MRP), member 1	0.843584	0.00687639	0.0254595
ENSMUSG00000030222	Rerg	232441	RAS-like, estrogen-regulated, growth-inhibitor	0.843574	0.000218375	0.001533
ENSMUSG00000027900	Dram2	67171	DNA-damage regulated autophagy modulator 2	0.843499	4.68845e-05	0.000427068
ENSMUSG00000031673	Cdh11	12552	cadherin 11	0.842108	3.1966e-08	9.20834e-07
ENSMUSG00000026064	Ptp4a1	19243	protein tyrosine phosphatase 4a1	0.841299	6.21689e-05	0.0005358
ENSMUSG00000055540	Epha6	13840	Eph receptor A6	0.840963	1.30301e-13	1.78036e-11
ENSMUSG00000029233	Srd5a3	57357	steroid 5 alpha-reductase 3	0.840102	0.0103747	0.0352949
ENSMUSG00000040043	Rbms2	56516	RNA binding motif, single stranded interacting protein 2	0.839838	0.00748985	0.0271926
ENSMUSG00000027957	Slc35a3	229782	solute carrier family 35 (UDP-N-acetylglucosamine (UDP-GlcNAc) transporter), member 3	0.839653	2.42639e-05	0.000246989
ENSMUSG00000024696	Lpxn	107321	leupaxin	0.839515	3.65823e-05	0.000347935
ENSMUSG00000014859	E2f4	104394	E2F transcription factor 4	0.838507	0.000180066	0.00129768
ENSMUSG00000030854	Ptpn5	19259	protein tyrosine phosphatase, non-receptor type 5	0.83823	3.51915e-06	4.99096e-05
ENSMUSG00000002831	Plin4	57435	perilipin 4	0.837458	0.00347886	0.0147604
ENSMUSG00000022324	Matn2	17181	matrilin 2	0.836446	7.5644e-07	1.34669e-05
ENSMUSG00000024211	Grm8	14823	glutamate receptor, metabotropic 8	0.836374	0.00243145	0.0111252
ENSMUSG00000033671	Cep350	74081	centrosomal protein 350	0.836235	2.783e-10	1.51363e-08
ENSMUSG00000028804	Csmd2	329942	CUB and Sushi multiple domains 2	0.83565	0.0003529	0.00227992
ENSMUSG00000054958	Nt5c1a	230718	5'-nucleotidase, cytosolic IA	0.834929	0.0030479	0.0133012
ENSMUSG00000001240	Ramp2	54409	receptor (calcitonin) activity modifying protein 2	0.834152	0.00618566	0.0234558
ENSMUSG00000046410	Kcnk6	52150	potassium inwardly-rectifying channel, subfamily K, member 6	0.834071	0.00897473	0.0314162
ENSMUSG00000027355	Tmco5	67356	transmembrane and coiled-coil domains 5	0.832363	0.00557821	0.0215165
ENSMUSG00000078307	AI593442	330941	expressed sequence AI593442	0.832354	1.35286e-14	2.18617e-12
ENSMUSG00000021754	Map3k1	26401	mitogen-activated protein kinase kinase kinase 1	0.830824	0.00625065	0.0236489
ENSMUSG00000050721	Plekho2	102595	pleckstrin homology domain containing, family O member 2	0.830087	0.00624606	0.0236368
ENSMUSG00000021256	Vash1	238328	vasohibin 1	0.829519	0.0138207	0.0443433
ENSMUSG00000028649	Macf1	11426	microtubule-actin crosslinking factor 1	0.829419	9.17729e-14	1.30706e-11
ENSMUSG00000028167	Bdh2	69772	3-hydroxybutyrate dehydrogenase, type 2	0.828832	0.000651135	0.00377735
ENSMUSG00000026888	Grb14	50915	growth factor receptor bound protein 14	0.828165	7.19629e-10	3.4141e-08
ENSMUSG00000094819	Olfr53	258962	olfactory receptor 53	0.827032	2.04077e-07	4.49505e-06
ENSMUSG00000029413	Naaa	67111	N-acylethanolamine acid amidase	0.826463	0.000538838	0.00321695
ENSMUSG00000043929	Klhl15	236904	kelch-like 15	0.826462	2.09411e-05	0.000220289
ENSMUSG00000021171	Esyt2	52635	extended synaptotagmin-like protein 2	0.826221	5.55634e-06	7.30671e-05
ENSMUSG00000018459	Slc13a3	114644	solute carrier family 13 (sodium-dependent dicarboxylate transporter), member 3	0.825956	0.00927918	0.0322803
ENSMUSG00000009216	Fam163b	109349	family with sequence similarity 163, member B	0.825765	1.65176e-07	3.73111e-06
ENSMUSG00000029994	Anxa4	11746	annexin A4	0.825403	0.0100391	0.034383
ENSMUSG00000026663	Atf6	226641	activating transcription factor 6	0.825374	9.45815e-09	3.27065e-07
ENSMUSG00000032135	Mcam	84004	melanoma cell adhesion molecule	0.82518	0.00188392	0.00905641
ENSMUSG00000003746	Man1a	17155	mannosidase 1, alpha	0.82419	1.53258e-07	3.49477e-06
ENSMUSG00000020811	Wscd1	216881	WSC domain containing 1	0.822717	5.3062e-05	0.000471332
ENSMUSG00000025492	Ifitm3	66141	interferon induced transmembrane protein 3	0.822238	0.0121282	0.0400368
ENSMUSG00000038538	Ubn2	320538	ubinuclein 2	0.821785	1.33966e-06	2.1774e-05
ENSMUSG00000046167	Gldn	235379	gliomedin	0.821501	0.0106037	0.0359577
ENSMUSG00000038879	Nipal2	223473	NIPA-like domain containing 2	0.821439	0.0100635	0.0344347
ENSMUSG00000056073	Grik2	14806	glutamate receptor, ionotropic, kainate 2 (beta 2)	0.821224	3.6584e-06	5.15365e-05
ENSMUSG00000037685	Atp8a1	11980	ATPase, aminophospholipid transporter (APLT), class I, type 8A, member 1	0.821096	7.65723e-11	4.94951e-09
ENSMUSG00000034472	Rasd2	75141	RASD family, member 2	0.82086	6.48801e-08	1.66979e-06
ENSMUSG00000036510	Cdh8	12564	cadherin 8	0.820179	0.000263693	0.00179131
ENSMUSG00000003824	Syce2	71846	synaptonemal complex central element protein 2	0.820175	0.000183159	0.00131608
ENSMUSG00000001576	Ergic1	67458	endoplasmic reticulum-golgi intermediate compartment (ERGIC) 1	0.819519	3.30553e-08	9.44775e-07
ENSMUSG00000022711	Pmm2	54128	phosphomannomutase 2	0.818965	0.0083323	0.0296365
ENSMUSG00000037621	Atoh8	71093	atonal bHLH transcription factor 8	0.818845	0.0121844	0.0402065
ENSMUSG00000060716	Plekhh1	211945	pleckstrin homology domain containing, family H (with MyTH4 domain) member 1	0.818659	0.00249608	0.0113622
ENSMUSG00000000317	Bcl6b	12029	B cell CLL/lymphoma 6, member B	0.818477	0.000195083	0.00138804
ENSMUSG00000042804	Gpr153	100129	G protein-coupled receptor 153	0.818357	0.0141014	0.0450204
ENSMUSG00000057982	Zfp809	235047	zinc finger protein 809	0.818193	0.000649497	0.00377175
ENSMUSG00000036887	C1qa	12259	complement component 1, q subcomponent, alpha polypeptide	0.816398	0.00311139	0.0135116
ENSMUSG00000022053	Ebf2	13592	early B cell factor 2	0.816364	0.000138337	0.00103942
ENSMUSG00000042500	Ago4	76850	argonaute RISC catalytic subunit 4	0.815134	0.000301475	0.00199787
ENSMUSG00000028744	Slc66a1	212555	solute carrier family 66 member 1	0.814977	0.00359496	0.0151383
ENSMUSG00000034687	Fras1	231470	Fraser extracellular matrix complex subunit 1	0.814614	0.00263679	0.0118613
ENSMUSG00000023411	Nfatc4	73181	nuclear factor of activated T cells, cytoplasmic, calcineurin dependent 4	0.814041	0.000938333	0.00509684
ENSMUSG00000025572	Tmc6	217353	transmembrane channel-like gene family 6	0.813623	0.00568932	0.0219049
ENSMUSG00000058440	Nrf1	18181	nuclear respiratory factor 1	0.813158	0.00019071	0.00135981
ENSMUSG00000028152	Tspan5	56224	tetraspanin 5	0.813084	4.38192e-11	3.05571e-09
ENSMUSG00000035910	Dcdc2a	195208	doublecortin domain containing 2a	0.813008	0.000451892	0.00277268
ENSMUSG00000033981	Gria2	14800	glutamate receptor, ionotropic, AMPA2 (alpha 2)	0.811914	9.07784e-13	9.84272e-11
ENSMUSG00000062519	Zfp398	272347	zinc finger protein 398	0.811796	1.04919e-06	1.78108e-05
ENSMUSG00000036196	Slc26a8	224661	solute carrier family 26, member 8	0.811055	0.00549102	0.0212485
ENSMUSG00000022020	Naa16	66897	N(alpha)-acetyltransferase 16, NatA auxiliary subunit	0.810904	5.22436e-06	6.92981e-05
ENSMUSG00000074892	B3galt5	93961	UDP-Gal:betaGlcNAc beta 1,3-galactosyltransferase, polypeptide 5	0.810593	5.22542e-05	0.000466375
ENSMUSG00000050612	Txndc2	213272	thioredoxin domain containing 2 (spermatozoa)	0.809703	0.00066565	0.00384034
ENSMUSG00000024174	Pot1b	72836	protection of telomeres 1B	0.809212	0.00158795	0.00786895
ENSMUSG00000015829	Tnr	21960	tenascin R	0.808912	2.20164e-09	9.15861e-08
ENSMUSG00000029627	Zkscan14	67235	zinc finger with KRAB and SCAN domains 14	0.808615	0.00552922	0.021352
ENSMUSG00000059213	Ddn	13199	dendrin	0.808371	3.43088e-08	9.75625e-07
ENSMUSG00000031508	Ankrd10	102334	ankyrin repeat domain 10	0.808203	0.0012903	0.00664567
ENSMUSG00000030882	Dnhd1	77505	dynein heavy chain domain 1	0.807941	0.0100787	0.0344763
ENSMUSG00000037552	Plekhg2	101497	pleckstrin homology domain containing, family G (with RhoGef domain) member 2	0.807473	0.00809788	0.028956
ENSMUSG00000054863	Tafa5	106014	TAFA chemokine like family member 5	0.80742	1.28737e-10	7.89621e-09
ENSMUSG00000052353	Cemip	80982	cell migration inducing protein, hyaluronan binding	0.807212	0.0120509	0.0398205
ENSMUSG00000063531	Sema3e	20349	sema domain, immunoglobulin domain (Ig), short basic domain, secreted, (semaphorin) 3E	0.806569	0.0010709	0.00568824
ENSMUSG00000069833	Ahnak	66395	AHNAK nucleoprotein (desmoyokin)	0.806554	0.000576237	0.00340755
ENSMUSG00000062078	Qk	19317	quaking	0.80586	3.05892e-07	6.418e-06
ENSMUSG00000064043	Trerf1	224829	transcriptional regulating factor 1	0.805419	0.000380187	0.00240928
ENSMUSG00000073418	C4b	12268	complement component 4B (Chido blood group)	0.804963	0.00898205	0.0314167
ENSMUSG00000035112	Wnk4	69847	WNK lysine deficient protein kinase 4	0.804879	0.00958139	0.0331327
ENSMUSG00000038047	Haus6	230376	HAUS augmin-like complex, subunit 6	0.804616	1.66369e-05	0.000183103
ENSMUSG00000050912	Tmem123	71929	transmembrane protein 123	0.804456	0.0120316	0.0397703
ENSMUSG00000037683	Armc3	70882	armadillo repeat containing 3	0.804089	0.000155577	0.00114576
ENSMUSG00000024048	Myl12a	67268	myosin, light chain 12A, regulatory, non-sarcomeric	0.803785	0.0072614	0.0265467
ENSMUSG00000020921	Tmem101	76547	transmembrane protein 101	0.803293	0.0134131	0.04335
ENSMUSG00000002015	Bcap31	27061	B cell receptor associated protein 31	0.801543	6.47798e-06	8.29162e-05
ENSMUSG00000070565	Rasal2	226525	RAS protein activator like 2	0.801304	2.29799e-11	1.73964e-09
ENSMUSG00000029212	Gabrb1	14400	gamma-aminobutyric acid (GABA) A receptor, subunit beta 1	0.801299	4.32135e-13	5.22479e-11
ENSMUSG00000020102	Slc16a7	20503	solute carrier family 16 (monocarboxylic acid transporters), member 7	0.801287	2.34732e-05	0.000240837
ENSMUSG00000034998	Foxn2	14236	forkhead box N2	0.800261	2.21425e-06	3.32257e-05
ENSMUSG00000043164	Tmem212	208613	transmembrane protein 212	0.799996	0.0151412	0.0476166
ENSMUSG00000034908	Sidt2	214597	SID1 transmembrane family, member 2	0.79946	0.000129887	0.000985947
ENSMUSG00000029188	Slc34a2	20531	solute carrier family 34 (sodium phosphate), member 2	0.799283	0.000127135	0.000969802
ENSMUSG00000030306	Tmtc1	387314	transmembrane and tetratricopeptide repeat containing 1	0.798988	9.095e-10	4.22239e-08
ENSMUSG00000052812	Atad2b	320817	ATPase family, AAA domain containing 2B	0.798712	0.000675412	0.00388865
ENSMUSG00000028158	Mttp	17777	microsomal triglyceride transfer protein	0.797894	0.015192	0.0477586
ENSMUSG00000028962	Slc4a2	20535	solute carrier family 4 (anion exchanger), member 2	0.797278	0.00175973	0.00857467
ENSMUSG00000030231	Plekha5	109135	pleckstrin homology domain containing, family A member 5	0.79688	1.81122e-05	0.000195878
ENSMUSG00000003812	Dnase2a	13423	deoxyribonuclease II alpha	0.796147	0.00208135	0.0098091
ENSMUSG00000031639	Tlr3	142980	toll-like receptor 3	0.795914	0.00358021	0.0151065
ENSMUSG00000051212	Gpr183	321019	G protein-coupled receptor 183	0.795409	0.000168784	0.00122764
ENSMUSG00000052726	Kcnt2	240776	potassium channel, subfamily T, member 2	0.795155	3.88941e-07	7.8282e-06
ENSMUSG00000029822	Osbpl3	71720	oxysterol binding protein-like 3	0.794637	0.000744359	0.0042007
ENSMUSG00000021090	Lrrc9	78257	leucine rich repeat containing 9	0.794022	0.00219785	0.0102345
ENSMUSG00000022602	Arc	11838	activity regulated cytoskeletal-associated protein	0.793563	1.36474e-07	3.16793e-06
ENSMUSG00000028807	Zbtb8a	73680	zinc finger and BTB domain containing 8a	0.793372	0.0148829	0.046989
ENSMUSG00000041135	Ripk2	192656	receptor (TNFRSF)-interacting serine-threonine kinase 2	0.792765	0.00848272	0.0300697
ENSMUSG00000027583	Zbtb46	72147	zinc finger and BTB domain containing 46	0.792531	0.00121721	0.00634896
ENSMUSG00000078771	Evi2a	14017	ecotropic viral integration site 2a	0.792365	0.00107509	0.00570689
ENSMUSG00000073413	Ly6g6d	114654	lymphocyte antigen 6 complex, locus G6D	0.792039	6.19078e-05	0.000533994
ENSMUSG00000036586	Grifin	77998	galectin-related inter-fiber protein	0.791239	6.41661e-05	0.000549912
ENSMUSG00000078716	Tmem8b	242409	transmembrane protein 8B	0.78958	2.80107e-09	1.10764e-07
ENSMUSG00000015243	Abca1	11303	ATP-binding cassette, sub-family A (ABC1), member 1	0.789428	0.00133706	0.00682789
ENSMUSG00000031518	Spata4	69281	spermatogenesis associated 4	0.78908	6.0427e-05	0.000524013
ENSMUSG00000019761	Krt10	16661	keratin 10	0.788849	0.00901996	0.0315089
ENSMUSG00000020821	Kif1c	16562	kinesin family member 1C	0.788299	0.00136305	0.00692697
ENSMUSG00000022836	Mylk	107589	myosin, light polypeptide kinase	0.787955	1.73683e-06	2.7002e-05
ENSMUSG00000048856	Slc25a47	104910	solute carrier family 25, member 47	0.787689	0.0146254	0.0463904
ENSMUSG00000047658	Gal3st3	545276	galactose-3-O-sulfotransferase 3	0.787189	6.48759e-06	8.29234e-05
ENSMUSG00000046480	Scn4b	399548	sodium channel, type IV, beta	0.787104	0.0123807	0.0406785
ENSMUSG00000024172	St6gal2	240119	beta galactoside alpha 2,6 sialyltransferase 2	0.786872	0.00116961	0.00613883
ENSMUSG00000027886	1700013F07Rik	75504	RIKEN cDNA 1700013F07 gene	0.785827	0.000225246	0.00157074
ENSMUSG00000024411	Aqp4	11829	aquaporin 4	0.785731	9.96154e-05	0.000793054
ENSMUSG00000030877	Mfsd13b	74466	major facilitator superfamily domain containing 13B	0.785445	4.82959e-05	0.00043788
ENSMUSG00000029823	Luc7l2	192196	LUC7-like 2 (S. cerevisiae)	0.784581	1.46924e-08	4.73937e-07
ENSMUSG00000096887	Gm20594	100463512	predicted gene, 20594	0.783481	0.00214226	0.010037
ENSMUSG00000056752	Dnah9	237806	dynein, axonemal, heavy chain 9	0.783227	0.00633508	0.023877
ENSMUSG00000060882	Kcnd2	16508	potassium voltage-gated channel, Shal-related family, member 2	0.781553	3.44116e-10	1.82436e-08
ENSMUSG00000030407	Qpctl	67369	glutaminyl-peptide cyclotransferase-like	0.781117	0.00038191	0.00241383
ENSMUSG00000032939	Nup93	71805	nucleoporin 93	0.779542	4.09198e-07	8.16744e-06
ENSMUSG00000029524	Sirt4	75387	sirtuin 4	0.779371	0.00899863	0.0314606
ENSMUSG00000002930	Ppp1r17	19051	protein phosphatase 1, regulatory subunit 17	0.779232	0.000585296	0.00345019
ENSMUSG00000021009	Ptpn21	24000	protein tyrosine phosphatase, non-receptor type 21	0.778925	0.0136035	0.0437972
ENSMUSG00000020052	Ascl1	17172	achaete-scute family bHLH transcription factor 1	0.778428	0.00122258	0.00636711
ENSMUSG00000004035	Gstm7	68312	glutathione S-transferase, mu 7	0.778085	8.07137e-07	1.41742e-05
ENSMUSG00000028232	Tmem68	72098	transmembrane protein 68	0.777588	1.75574e-05	0.000191355
ENSMUSG00000014609	Chrne	11448	cholinergic receptor, nicotinic, epsilon polypeptide	0.776508	9.31311e-05	0.000748881
ENSMUSG00000025666	Tmem47	192216	transmembrane protein 47	0.775413	3.31239e-07	6.83882e-06
ENSMUSG00000022103	Gfra2	14586	glial cell line derived neurotrophic factor family receptor alpha 2	0.775284	1.49692e-05	0.000167491
ENSMUSG00000025724	Sec11a	56529	SEC11 homolog A, signal peptidase complex subunit	0.773008	0.000289517	0.00193773
ENSMUSG00000070814	Zswim9	321008	zinc finger SWIM-type containing 9	0.77244	0.00105758	0.00562815
ENSMUSG00000037400	Atp11b	76295	ATPase, class VI, type 11B	0.772303	0.000274179	0.00184832
ENSMUSG00000070687	Htr1d	15552	5-hydroxytryptamine (serotonin) receptor 1D	0.772225	1.61461e-06	2.536e-05
ENSMUSG00000001700	Gramd3	107022	GRAM domain containing 3	0.772165	0.0123548	0.040627
ENSMUSG00000045994	B3gat1	76898	beta-1,3-glucuronyltransferase 1 (glucuronosyltransferase P)	0.771908	6.04189e-10	2.95175e-08
ENSMUSG00000029534	St7	64213	suppression of tumorigenicity 7	0.771195	0.00232623	0.0107462
ENSMUSG00000022766	Serpind1	15160	serine (or cysteine) peptidase inhibitor, clade D, member 1	0.770681	2.75431e-05	0.000274223
ENSMUSG00000116895	Gm3435	100041621	predicted gene 3435	0.769981	0.00787215	0.0282872
ENSMUSG00000028420	Tmem38b	52076	transmembrane protein 38B	0.769795	0.00210424	0.00988924
ENSMUSG00000027570	Col9a3	12841	collagen, type IX, alpha 3	0.76846	0.00537936	0.0209127
ENSMUSG00000000320	Alox12	11684	arachidonate 12-lipoxygenase	0.767186	1.45835e-05	0.00016372
ENSMUSG00000062785	Kcnc3	16504	potassium voltage gated channel, Shaw-related subfamily, member 3	0.766935	0.000667551	0.00384999
ENSMUSG00000024238	Zeb1	21417	zinc finger E-box binding homeobox 1	0.766696	4.29556e-07	8.49308e-06
ENSMUSG00000024180	Pgap6	60455	post-glycosylphosphatidylinositol attachment to proteins 6	0.764399	0.00936337	0.0325126
ENSMUSG00000019189	Rnf145	74315	ring finger protein 145	0.763966	7.25079e-05	0.000610754
ENSMUSG00000029910	Mad2l1	56150	MAD2 mitotic arrest deficient-like 1	0.76342	0.000200209	0.00141746
ENSMUSG00000060988	Galnt13	271786	polypeptide N-acetylgalactosaminyltransferase 13	0.763238	0.00033468	0.0021784
ENSMUSG00000036098	Myrf	225908	myelin regulatory factor	0.763133	0.00224227	0.0104156
ENSMUSG00000063108	Zfp26	22688	zinc finger protein 26	0.763009	0.000651674	0.00377917
ENSMUSG00000034765	Dusp5	240672	dual specificity phosphatase 5	0.762996	0.00695318	0.0256825
ENSMUSG00000068259	Olfr461	258380	olfactory receptor 461	0.762944	0.00783102	0.0281715
ENSMUSG00000031557	Plekha2	83436	pleckstrin homology domain-containing, family A (phosphoinositide binding specific) member 2	0.762217	0.00185459	0.00894868
ENSMUSG00000021385	Ippk	75678	inositol 1,3,4,5,6-pentakisphosphate 2-kinase	0.76203	2.53759e-07	5.44659e-06
ENSMUSG00000027087	Itgav	16410	integrin alpha V	0.761518	0.000499035	0.00302335
ENSMUSG00000028469	Npr2	230103	natriuretic peptide receptor 2	0.761282	0.0142575	0.0454326
ENSMUSG00000099083	Atf7	223922	activating transcription factor 7	0.760837	4.1494e-07	8.26243e-06
ENSMUSG00000035566	Pcdh17	219228	protocadherin 17	0.759037	1.25743e-06	2.05968e-05
ENSMUSG00000059866	Tnip2	231130	TNFAIP3 interacting protein 2	0.758888	0.00890195	0.03122
ENSMUSG00000022210	Dhrs4	28200	dehydrogenase/reductase (SDR family) member 4	0.758705	0.0136616	0.0439419
ENSMUSG00000046753	Ccdc66	320234	coiled-coil domain containing 66	0.758252	0.00031933	0.00209635
ENSMUSG00000039046	Usp6nl	98910	USP6 N-terminal like	0.757658	6.57772e-05	0.000562357
ENSMUSG00000039323	Igfbp2	16008	insulin-like growth factor binding protein 2	0.757468	0.0108142	0.0365053
ENSMUSG00000050714	Zbtb26	320633	zinc finger and BTB domain containing 26	0.75724	0.00240168	0.011016
ENSMUSG00000027215	Cd82	12521	CD82 antigen	0.756924	0.00273308	0.0122128
ENSMUSG00000025199	Chuk	12675	conserved helix-loop-helix ubiquitous kinase	0.756362	0.000142207	0.00106266
ENSMUSG00000051401	Kctd16	383348	potassium channel tetramerisation domain containing 16	0.755897	0.00137723	0.00698211
ENSMUSG00000032128	Robo3	19649	roundabout guidance receptor 3	0.755316	0.0085347	0.0302349
ENSMUSG00000051067	Lingo3	237403	leucine rich repeat and Ig domain containing 3	0.754516	0.00365673	0.0153555
ENSMUSG00000039765	Cc2d2a	231214	coiled-coil and C2 domain containing 2A	0.753472	0.000689259	0.00394809
ENSMUSG00000073792	Alg6	320438	asparagine-linked glycosylation 6 (alpha-1,3,-glucosyltransferase)	0.753254	0.00472894	0.0188373
ENSMUSG00000031441	Atp11a	50770	ATPase, class VI, type 11A	0.75231	0.000441847	0.00272302
ENSMUSG00000027326	Knl1	76464	kinetochore scaffold 1	0.75122	1.80354e-05	0.00019555
ENSMUSG00000020743	Mif4gd	69674	MIF4G domain containing	0.751071	0.00547291	0.0211979
ENSMUSG00000002365	Snx9	66616	sorting nexin 9	0.750936	0.00336409	0.0143933
ENSMUSG00000046240	Hepacam	72927	hepatocyte cell adhesion molecule	0.75034	0.00142493	0.00719796
ENSMUSG00000029754	Dlx6	13396	distal-less homeobox 6	0.75027	0.00341955	0.014575
ENSMUSG00000043131	Mob1a	232157	MOB kinase activator 1A	0.749873	0.000638173	0.00371369
ENSMUSG00000055945	Prr18	320111	proline rich 18	0.749795	0.0134897	0.0435474
ENSMUSG00000063810	Alms1	236266	ALMS1, centrosome and basal body associated	0.748075	0.00116182	0.00611126
ENSMUSG00000020090	Npffr1	237362	neuropeptide FF receptor 1	0.747777	0.00390104	0.0161599
ENSMUSG00000030878	Cdr2	12585	cerebellar degeneration-related 2	0.747479	0.00947211	0.0328223
ENSMUSG00000037876	Jmjd1c	108829	jumonji domain containing 1C	0.747296	1.15681e-08	3.89608e-07
ENSMUSG00000055078	Gabra5	110886	gamma-aminobutyric acid (GABA) A receptor, subunit alpha 5	0.746797	7.77067e-11	5.0036e-09
ENSMUSG00000001435	Col18a1	12822	collagen, type XVIII, alpha 1	0.746544	0.00110836	0.00586497
ENSMUSG00000031342	Gpm6b	14758	glycoprotein m6b	0.746001	1.50247e-10	9.08293e-09
ENSMUSG00000028955	Vamp3	22319	vesicle-associated membrane protein 3	0.745495	0.000904395	0.00493964
ENSMUSG00000067028	Cntnap5b	241175	contactin associated protein-like 5B	0.745105	0.0054479	0.0211254
ENSMUSG00000059602	Syn3	27204	synapsin III	0.745085	0.00369962	0.0155192
ENSMUSG00000032705	Exd2	97827	exonuclease 3'-5' domain containing 2	0.744603	0.000825446	0.00459048
ENSMUSG00000021236	Entpd5	12499	ectonucleoside triphosphate diphosphohydrolase 5	0.743795	0.0010381	0.00553674
ENSMUSG00000027132	Katnbl1	72425	katanin p80 subunit B like 1	0.743599	3.53888e-05	0.000337923
ENSMUSG00000022129	Dct	13190	dopachrome tautomerase	0.743273	8.26877e-06	0.000101806
ENSMUSG00000041229	Phf8	320595	PHD finger protein 8	0.742616	0.000247234	0.00170179
ENSMUSG00000021451	Sema4d	20354	sema domain, immunoglobulin domain (Ig), transmembrane domain (TM) and short cytoplasmic domain, (semaphorin) 4D	0.742552	0.00236881	0.0109051
ENSMUSG00000049538	Adamts16	271127	a disintegrin-like and metallopeptidase (reprolysin type) with thrombospondin type 1 motif, 16	0.742379	0.00689075	0.0254911
ENSMUSG00000004885	Crabp2	12904	cellular retinoic acid binding protein II	0.741768	0.00876601	0.0308656
ENSMUSG00000032593	Amigo3	320844	adhesion molecule with Ig like domain 3	0.741499	0.000139907	0.00104827
ENSMUSG00000021583	Erap1	80898	endoplasmic reticulum aminopeptidase 1	0.741494	0.010656	0.0361058
ENSMUSG00000038206	Fbxo8	50753	F-box protein 8	0.740365	0.00445644	0.0180251
ENSMUSG00000030218	Mgp	17313	matrix Gla protein	0.740261	0.00862164	0.0304706
ENSMUSG00000038437	Mllt6	246198	myeloid/lymphoid or mixed-lineage leukemia; translocated to, 6	0.7398	3.1244e-05	0.000304398
ENSMUSG00000042156	Dzip1	66573	DAZ interacting protein 1	0.739381	0.00423199	0.017267
ENSMUSG00000045662	Henmt1	66715	HEN1 methyltransferase homolog 1 (Arabidopsis)	0.739283	0.000221022	0.00154784
ENSMUSG00000028413	B4galt1	14595	UDP-Gal:betaGlcNAc beta 1,4- galactosyltransferase, polypeptide 1	0.739074	0.00817011	0.0291708
ENSMUSG00000044352	Sowaha	237761	sosondowah ankyrin repeat domain family member A	0.738786	3.70794e-12	3.36842e-10
ENSMUSG00000042793	Lgr6	329252	leucine-rich repeat-containing G protein-coupled receptor 6	0.738685	0.0146627	0.0464501
ENSMUSG00000040774	Cept1	99712	choline/ethanolaminephosphotransferase 1	0.737609	0.000240324	0.00165936
ENSMUSG00000078453	Abracl	73112	ABRA C-terminal like	0.737076	2.60121e-05	0.000262112
ENSMUSG00000024483	Ankhd1	108857	ankyrin repeat and KH domain containing 1	0.736921	8.11754e-10	3.82138e-08
ENSMUSG00000055761	Nkain3	269513	Na+/K+ transporting ATPase interacting 3	0.736768	0.0146458	0.0464173
ENSMUSG00000028226	Mmp16	17389	matrix metallopeptidase 16	0.73379	5.46277e-06	7.20623e-05
ENSMUSG00000003190	Bcl2l12	75736	BCL2-like 12 (proline rich)	0.733445	0.000824812	0.00458848
ENSMUSG00000057060	Slc35f3	210027	solute carrier family 35, member F3	0.733169	2.4751e-05	0.000251187
ENSMUSG00000027777	Schip1	30953	schwannomin interacting protein 1	0.732981	0.00156931	0.00779827
ENSMUSG00000002881	Nab1	17936	Ngfi-A binding protein 1	0.732922	3.83974e-06	5.37755e-05
ENSMUSG00000068284	Usf3	207806	upstream transcription factor family member 3	0.732702	4.65538e-11	3.23299e-09
ENSMUSG00000019961	Tmpo	21917	thymopoietin	0.73191	0.0010835	0.00574637
ENSMUSG00000078234	Klhdc7a	242721	kelch domain containing 7A	0.730876	0.0158035	0.0492225
ENSMUSG00000055675	Kbtbd11	74901	kelch repeat and BTB (POZ) domain containing 11	0.730854	8.31001e-10	3.90106e-08
ENSMUSG00000000632	Sez6	20370	seizure related gene 6	0.730144	0.00344411	0.0146351
ENSMUSG00000026469	Xpr1	19775	xenotropic and polytropic retrovirus receptor 1	0.729954	4.61414e-06	6.2486e-05
ENSMUSG00000028080	Lrba	80877	LPS-responsive beige-like anchor	0.729263	2.34458e-05	0.000240703
ENSMUSG00000048251	Bcl11b	58208	B cell leukemia/lymphoma 11B	0.728497	3.81758e-11	2.71918e-09
ENSMUSG00000039529	Atp8b1	54670	ATPase, class I, type 8B, member 1	0.727659	0.0114048	0.0381506
ENSMUSG00000069808	Tlcd3a	116972	TLC domain containing 3A	0.726806	0.000175492	0.00126907
ENSMUSG00000048911	Rnf24	51902	ring finger protein 24	0.726793	4.61275e-06	6.2486e-05
ENSMUSG00000025078	Nhlrc2	66866	NHL repeat containing 2	0.726691	0.000776593	0.00435773
ENSMUSG00000064210	Ano6	105722	anoctamin 6	0.726571	0.00564006	0.0217301
ENSMUSG00000014599	Csf1	12977	colony stimulating factor 1 (macrophage)	0.726348	0.00871773	0.0307278
ENSMUSG00000028412	Slc44a1	100434	solute carrier family 44, member 1	0.725884	0.0108151	0.0365053
ENSMUSG00000091556	Gm14569	101055983	predicted gene 14569	0.724959	0.012258	0.0403745
ENSMUSG00000011427	Zfp790	233056	zinc finger protein 790	0.723426	0.00986942	0.0339471
ENSMUSG00000078161	Erich3	209601	glutamate rich 3	0.723173	0.00399301	0.0164437
ENSMUSG00000071477	Zfp777	72306	zinc finger protein 777	0.722693	0.0125364	0.0411098
ENSMUSG00000020700	Map3k3	26406	mitogen-activated protein kinase kinase kinase 3	0.72197	0.000884546	0.00485367
ENSMUSG00000005949	Ctns	83429	cystinosis, nephropathic	0.721825	0.0120134	0.0397284
ENSMUSG00000022248	Rad1	19355	RAD1 checkpoint DNA exonuclease	0.719969	0.0142119	0.0453217
ENSMUSG00000016477	E2f3	13557	E2F transcription factor 3	0.719926	5.99013e-07	1.11484e-05
ENSMUSG00000005150	Wdr83	67836	WD repeat domain containing 83	0.71981	0.0143816	0.04575
ENSMUSG00000096393	Fam240a	235634	family with sequence similarity 240 member A	0.719548	6.96682e-05	0.000590738
ENSMUSG00000037110	Ralgapa2	241694	Ral GTPase activating protein, alpha subunit 2 (catalytic)	0.719504	0.0021213	0.0099555
ENSMUSG00000021796	Bmpr1a	12166	bone morphogenetic protein receptor, type 1A	0.719202	2.77192e-07	5.88192e-06
ENSMUSG00000010175	Prox1	19130	prospero homeobox 1	0.719038	3.7566e-05	0.000354882
ENSMUSG00000046168	Kcnrg	328424	potassium channel regulator	0.718968	0.00997184	0.0342014
ENSMUSG00000075224	Lrrc55	241528	leucine rich repeat containing 55	0.718639	0.00116597	0.00612354
ENSMUSG00000055214	Pld5	319455	phospholipase D family, member 5	0.718513	0.00704918	0.0259515
ENSMUSG00000033233	Trim45	229644	tripartite motif-containing 45	0.71819	0.0147799	0.0467445
ENSMUSG00000029528	Pxn	19303	paxillin	0.717979	0.00387226	0.0160684
ENSMUSG00000075595	Zfp652	268469	zinc finger protein 652	0.71741	1.86147e-08	5.81485e-07
ENSMUSG00000032733	Snx33	235406	sorting nexin 33	0.716898	0.0139792	0.0447069
ENSMUSG00000038976	Ppp1r9b	217124	protein phosphatase 1, regulatory subunit 9B	0.71662	0.000271516	0.00183552
ENSMUSG00000030672	Mylpf	17907	myosin light chain, phosphorylatable, fast skeletal muscle	0.71641	0.00702371	0.0258862
ENSMUSG00000046532	Ar	11835	androgen receptor	0.716092	1.28318e-05	0.00014744
ENSMUSG00000026567	Adcy10	271639	adenylate cyclase 10	0.714435	0.000301238	0.00199787
ENSMUSG00000057706	Mex3b	108797	mex3 RNA binding family member B	0.714204	0.00134196	0.00684876
ENSMUSG00000000194	Gpr107	277463	G protein-coupled receptor 107	0.713924	0.000381364	0.00241215
ENSMUSG00000031827	Cotl1	72042	coactosin-like 1 (Dictyostelium)	0.713467	0.00445768	0.0180251
ENSMUSG00000020932	Gfap	14580	glial fibrillary acidic protein	0.713125	0.000622313	0.00363398
ENSMUSG00000033676	Gabrb3	14402	gamma-aminobutyric acid (GABA) A receptor, subunit beta 3	0.712945	3.05149e-11	2.24927e-09
ENSMUSG00000030747	Dgat2	67800	diacylglycerol O-acyltransferase 2	0.712764	0.00614382	0.0233182
ENSMUSG00000053963	Stum	381310	mechanosensory transduction mediator	0.711666	1.75582e-10	1.03538e-08
ENSMUSG00000038844	Kif16b	16558	kinesin family member 16B	0.711604	0.0116334	0.0387303
ENSMUSG00000028708	Mknk1	17346	MAP kinase-interacting serine/threonine kinase 1	0.711402	0.00188683	0.00906323
ENSMUSG00000025352	Gdf11	14561	growth differentiation factor 11	0.710681	0.00161993	0.00799669
ENSMUSG00000034210	Efcab14	230648	EF-hand calcium binding domain 14	0.710238	4.94671e-09	1.83926e-07
ENSMUSG00000023066	Rttn	246102	rotatin	0.710151	0.00992303	0.0340857
ENSMUSG00000021846	Peli2	93834	pellino 2	0.710151	2.76339e-05	0.000274965
ENSMUSG00000040407	Akap9	100986	A kinase (PRKA) anchor protein (yotiao) 9	0.709537	1.68015e-11	1.31333e-09
ENSMUSG00000071337	Tia1	21841	cytotoxic granule-associated RNA binding protein 1	0.708366	0.00123042	0.006402
ENSMUSG00000017453	Pipox	19193	pipecolic acid oxidase	0.708231	0.0037399	0.0156398
ENSMUSG00000047146	Tet1	52463	tet methylcytosine dioxygenase 1	0.708081	0.0017816	0.00866116
ENSMUSG00000078532	Nkain1	67149	Na+/K+ transporting ATPase interacting 1	0.707476	0.00638589	0.0240254
ENSMUSG00000033214	Slitrk5	75409	SLIT and NTRK-like family, member 5	0.707239	0.000196816	0.0013992
ENSMUSG00000035735	Dagla	269060	diacylglycerol lipase, alpha	0.70668	0.0078851	0.0283277
ENSMUSG00000024843	Chka	12660	choline kinase alpha	0.706087	5.20901e-07	9.93674e-06
ENSMUSG00000075254	Heg1	77446	heart development protein with EGF-like domains 1	0.705627	0.00393084	0.0162394
ENSMUSG00000020848	Doc2b	13447	double C2, beta	0.705425	9.46738e-07	1.6219e-05
ENSMUSG00000025019	Lcor	212391	ligand dependent nuclear receptor corepressor	0.705138	0.00026667	0.00181004
ENSMUSG00000096054	Syne1	64009	spectrin repeat containing, nuclear envelope 1	0.705002	1.67333e-11	1.31333e-09
ENSMUSG00000022272	Myo10	17909	myosin X	0.704816	0.00153916	0.00766658
ENSMUSG00000053113	Socs3	12702	suppressor of cytokine signaling 3	0.704687	0.000424917	0.00264194
ENSMUSG00000020319	Wdpcp	216560	WD repeat containing planar cell polarity effector	0.704319	9.02537e-05	0.000731342
ENSMUSG00000041075	Fzd7	14369	frizzled class receptor 7	0.704201	0.0100553	0.0344314
ENSMUSG00000025221	Kcnip2	80906	Kv channel-interacting protein 2	0.704056	8.9583e-05	0.000726959
ENSMUSG00000035778	Ggta1	14594	glycoprotein galactosyltransferase alpha 1, 3	0.703274	0.0135018	0.0435697
ENSMUSG00000030894	Tpp1	12751	tripeptidyl peptidase I	0.703184	7.32959e-05	0.000614063
ENSMUSG00000039835	Nhsl1	215819	NHS-like 1	0.702945	7.8844e-07	1.39333e-05
ENSMUSG00000032582	Rbm6	19654	RNA binding motif protein 6	0.702552	0.000159121	0.00116522
ENSMUSG00000042312	S100a13	20196	S100 calcium binding protein A13	0.701748	0.0118662	0.0393805
ENSMUSG00000040151	Hs2st1	23908	heparan sulfate 2-O-sulfotransferase 1	0.70162	1.46427e-08	4.73241e-07
ENSMUSG00000024014	Pim1	18712	proviral integration site 1	0.701503	0.000732297	0.00414377
ENSMUSG00000019916	P4ha1	18451	procollagen-proline, 2-oxoglutarate 4-dioxygenase (proline 4-hydroxylase), alpha 1 polypeptide	0.701106	0.00695239	0.0256825
ENSMUSG00000028565	Nfia	18027	nuclear factor I/A	0.700135	2.41147e-10	1.35542e-08
ENSMUSG00000037624	Kcnk2	16526	potassium channel, subfamily K, member 2	0.698776	0.000260764	0.00177929
ENSMUSG00000027569	Mrgbp	73247	MRG/MORF4L binding protein	0.698433	0.00687901	0.0254595
ENSMUSG00000028822	Tmem50a	71817	transmembrane protein 50A	0.698353	4.09341e-06	5.67606e-05
ENSMUSG00000000127	Fer	14158	fer (fms/fps related) protein kinase	0.698315	0.00372019	0.0155836
ENSMUSG00000057156	Homez	239099	homeodomain leucine zipper-encoding gene	0.697478	0.000133065	0.00100598
ENSMUSG00000001986	Gria3	53623	glutamate receptor, ionotropic, AMPA3 (alpha 3)	0.696896	5.4217e-10	2.67991e-08
ENSMUSG00000058897	Col25a1	77018	collagen, type XXV, alpha 1	0.696724	3.42498e-06	4.89042e-05
ENSMUSG00000091002	Tcerg1l	70571	transcription elongation regulator 1-like	0.696533	0.000232602	0.00161466
ENSMUSG00000041775	Mapk1ip1	69546	mitogen-activated protein kinase 1 interacting protein 1	0.69603	0.00390782	0.0161839
ENSMUSG00000029245	Epha5	13839	Eph receptor A5	0.695638	1.13745e-09	5.13869e-08
ENSMUSG00000036192	Rorb	225998	RAR-related orphan receptor beta	0.695536	0.00532942	0.020757
ENSMUSG00000027854	Sike1	66641	suppressor of IKBKE 1	0.69469	2.7007e-06	3.97795e-05
ENSMUSG00000032773	Chrm1	12669	cholinergic receptor, muscarinic 1, CNS	0.694538	0.000131203	0.000994134
ENSMUSG00000034243	Golgb1	224139	golgi autoantigen, golgin subfamily b, macrogolgin 1	0.694354	3.64925e-07	7.41589e-06
ENSMUSG00000027999	Pla2g12a	66350	phospholipase A2, group XIIA	0.693322	0.00236906	0.0109051
ENSMUSG00000071392	Ect2l	100045792	epithelial cell transforming sequence 2 oncogene-like	0.692689	1.80937e-05	0.000195804
ENSMUSG00000063663	Brwd3	382236	bromodomain and WD repeat domain containing 3	0.692648	2.34478e-08	7.02429e-07
ENSMUSG00000045333	Zfp423	94187	zinc finger protein 423	0.692517	0.0112575	0.0377631
ENSMUSG00000018593	Sparc	20692	secreted acidic cysteine rich glycoprotein	0.692391	0.000360806	0.00231704
ENSMUSG00000021716	Srek1ip1	67288	splicing regulatory glutamine/lysine-rich protein 1interacting protein 1	0.692249	0.000324483	0.00212437
ENSMUSG00000039206	Daglb	231871	diacylglycerol lipase, beta	0.692234	0.00458839	0.0183897
ENSMUSG00000046318	Ccbe1	320924	collagen and calcium binding EGF domains 1	0.691938	0.0062752	0.0237098
ENSMUSG00000001280	Sp1	20683	trans-acting transcription factor 1	0.690947	0.000371644	0.00237124
ENSMUSG00000020865	Abcc3	76408	ATP-binding cassette, sub-family C (CFTR/MRP), member 3	0.6903	0.000128569	0.000977705
ENSMUSG00000022822	Abcc5	27416	ATP-binding cassette, sub-family C (CFTR/MRP), member 5	0.689623	0.00338456	0.0144661
ENSMUSG00000020734	Grin2c	14813	glutamate receptor, ionotropic, NMDA2C (epsilon 3)	0.688304	0.0107272	0.0362824
ENSMUSG00000035104	Eva1a	232146	eva-1 homolog A (C. elegans)	0.687689	0.00838148	0.0297737
ENSMUSG00000026565	Pou2f1	18986	POU domain, class 2, transcription factor 1	0.687671	0.0101121	0.0345626
ENSMUSG00000070520	Nsmce3	66647	NSE3 homolog, SMC5-SMC6 complex component	0.686968	0.00100469	0.00539275
ENSMUSG00000030579	Tyrobp	22177	TYRO protein tyrosine kinase binding protein	0.686397	0.0137577	0.0441918
ENSMUSG00000022994	Adcy6	11512	adenylate cyclase 6	0.68617	0.00643632	0.0241826
ENSMUSG00000034160	Ogt	108155	O-linked N-acetylglucosamine (GlcNAc) transferase (UDP-N-acetylglucosamine:polypeptide-N-acetylglucosaminyl transferase)	0.686151	6.06375e-05	0.000525296
ENSMUSG00000091415	Ak9	633979	adenylate kinase 9	0.685934	0.000953214	0.00516598
ENSMUSG00000036225	Kctd1	106931	potassium channel tetramerisation domain containing 1	0.684828	2.65746e-05	0.000266316
ENSMUSG00000025422	Agap2	216439	ArfGAP with GTPase domain, ankyrin repeat and PH domain 2	0.684645	0.000185532	0.00132852
ENSMUSG00000045838	Ccdc9b	214239	coiled-coil domain containing 9B	0.684446	0.0118085	0.0392045
ENSMUSG00000010066	Cacna2d2	56808	calcium channel, voltage-dependent, alpha 2/delta subunit 2	0.683562	4.86598e-05	0.000440375
ENSMUSG00000020798	Spns3	77577	spinster homolog 3	0.683519	0.000520224	0.00312581
ENSMUSG00000002996	Hbp1	73389	high mobility group box transcription factor 1	0.680426	0.00183887	0.00888175
ENSMUSG00000068250	Amn1	232566	antagonist of mitotic exit network 1	0.680076	0.00561343	0.0216325
ENSMUSG00000031574	Star	20845	steroidogenic acute regulatory protein	0.680054	0.0128396	0.041932
ENSMUSG00000043090	Zfp866	330788	zinc finger protein 866	0.679758	9.81399e-05	0.000783906
ENSMUSG00000078580	E430018J23Rik	101604	RIKEN cDNA E430018J23 gene	0.679734	0.0103147	0.0351335
ENSMUSG00000021959	Lats2	50523	large tumor suppressor 2	0.679627	2.30509e-08	6.955e-07
ENSMUSG00000055809	Dnaaf3	436022	dynein, axonemal assembly factor 3	0.679049	0.00151343	0.00755859
ENSMUSG00000050272	Dscam	13508	DS cell adhesion molecule	0.679019	3.29138e-06	4.73587e-05
ENSMUSG00000041014	Nrg3	18183	neuregulin 3	0.678872	4.54358e-05	0.000416354
ENSMUSG00000052504	Epha3	13837	Eph receptor A3	0.67794	0.00450104	0.0181401
ENSMUSG00000071646	Mta2	23942	metastasis-associated gene family, member 2	0.677074	0.00207979	0.00980447
ENSMUSG00000060487	Samd5	320825	sterile alpha motif domain containing 5	0.676723	0.000468184	0.00286537
ENSMUSG00000038143	Stox2	71069	storkhead box 2	0.676591	7.50031e-05	0.00062587
ENSMUSG00000066306	Numa1	101706	nuclear mitotic apparatus protein 1	0.67656	0.00467751	0.0186723
ENSMUSG00000054693	Adam10	11487	a disintegrin and metallopeptidase domain 10	0.676473	0.000462412	0.00283211
ENSMUSG00000038665	Dgki	320127	diacylglycerol kinase, iota	0.676406	8.08656e-05	0.000664842
ENSMUSG00000045414	Dipk2a	68861	divergent protein kinase domain 2A	0.675527	0.00539736	0.0209681
ENSMUSG00000020389	Cdkl3	213084	cyclin-dependent kinase-like 3	0.67502	0.000101877	0.000807234
ENSMUSG00000066613	Zfp932	69504	zinc finger protein 932	0.674963	0.000844689	0.00467892
ENSMUSG00000003166	Dgcr2	13356	DiGeorge syndrome critical region gene 2	0.674903	0.0112703	0.0377985
ENSMUSG00000046280	She	214547	src homology 2 domain-containing transforming protein E	0.673622	0.00681514	0.0253284
ENSMUSG00000048277	Syngr2	20973	synaptogyrin 2	0.673556	0.0131839	0.0427738
ENSMUSG00000030302	Atp2b2	11941	ATPase, Ca++ transporting, plasma membrane 2	0.672496	1.80461e-11	1.38796e-09
ENSMUSG00000026349	Ccnt2	72949	cyclin T2	0.672192	1.35565e-05	0.000153528
ENSMUSG00000071719	Tmem28	620592	transmembrane protein 28	0.671243	0.00836231	0.0297244
ENSMUSG00000032839	Trpc1	22063	transient receptor potential cation channel, subfamily C, member 1	0.671162	0.00349784	0.0148184
ENSMUSG00000025582	Nptx1	18164	neuronal pentraxin 1	0.670277	1.32142e-09	5.84417e-08
ENSMUSG00000027422	Rrbp1	81910	ribosome binding protein 1	0.669227	0.00172759	0.00843963
ENSMUSG00000054763	Defb42	619548	defensin beta 42	0.669127	0.00994848	0.0341411
ENSMUSG00000024817	Uhrf2	109113	ubiquitin-like, containing PHD and RING finger domains 2	0.668836	2.07482e-05	0.000218754
ENSMUSG00000040424	Hipk4	233020	homeodomain interacting protein kinase 4	0.668408	0.00710906	0.0260976
ENSMUSG00000031904	Slc7a6	330836	solute carrier family 7 (cationic amino acid transporter, y+ system), member 6	0.667973	0.00738007	0.0268695
ENSMUSG00000049313	Sorl1	20660	sortilin-related receptor, LDLR class A repeats-containing	0.667475	1.5816e-08	5.0533e-07
ENSMUSG00000041301	Cftr	12638	cystic fibrosis transmembrane conductance regulator	0.667262	0.00478339	0.0190043
ENSMUSG00000025964	Adam23	23792	a disintegrin and metallopeptidase domain 23	0.667096	1.51214e-07	3.46226e-06
ENSMUSG00000038415	Foxq1	15220	forkhead box Q1	0.667095	0.000913661	0.00498539
ENSMUSG00000005360	Slc1a3	20512	solute carrier family 1 (glial high affinity glutamate transporter), member 3	0.666026	0.00737979	0.0268695
ENSMUSG00000032373	Car12	76459	carbonic anhydrase 12	0.666018	0.00782148	0.0281533
ENSMUSG00000027007	Itprid2	70599	ITPR interacting domain containing 2	0.666009	0.00727488	0.0265844
ENSMUSG00000028521	Slc35d1	242585	solute carrier family 35 (UDP-glucuronic acid/UDP-N-acetylgalactosamine dual transporter), member D1	0.665781	0.00100045	0.00537348
ENSMUSG00000017677	Wsb1	78889	WD repeat and SOCS box-containing 1	0.664461	0.000819466	0.00456478
ENSMUSG00000052155	Acvr2a	11480	activin receptor IIA	0.663914	8.45218e-06	0.000103458
ENSMUSG00000026347	Tmem163	72160	transmembrane protein 163	0.663148	0.00264094	0.0118768
ENSMUSG00000035372	1810055G02Rik	72056	RIKEN cDNA 1810055G02 gene	0.662784	0.0080167	0.0287146
ENSMUSG00000073424	Cyp4f15	106648	cytochrome P450, family 4, subfamily f, polypeptide 15	0.661902	0.0110879	0.0372911
ENSMUSG00000024184	Pdia2	69191	protein disulfide isomerase associated 2	0.661171	3.24782e-05	0.000314236
ENSMUSG00000079481	Nhsl2	100042480	NHS-like 2	0.661096	1.33845e-07	3.12417e-06
ENSMUSG00000033577	Myo6	17920	myosin VI	0.660265	0.000342991	0.00222474
ENSMUSG00000023827	Agpat4	68262	1-acylglycerol-3-phosphate O-acyltransferase 4 (lysophosphatidic acid acyltransferase, delta)	0.659869	3.91754e-06	5.45922e-05
ENSMUSG00000025873	Faf2	76577	Fas associated factor family member 2	0.659607	0.00994228	0.0341278
ENSMUSG00000000276	Dgke	56077	diacylglycerol kinase, epsilon	0.659117	2.82731e-06	4.1354e-05
ENSMUSG00000036676	Tmtc3	237500	transmembrane and tetratricopeptide repeat containing 3	0.659022	0.00271219	0.0121388
ENSMUSG00000090946	Ccdc71l	72123	coiled-coil domain containing 71 like	0.658956	2.57588e-05	0.000259845
ENSMUSG00000051036	Ttc24	214191	tetratricopeptide repeat domain 24	0.658797	0.000105788	0.000832339
ENSMUSG00000048279	Sacs	50720	sacsin	0.657374	1.25136e-06	2.05173e-05
ENSMUSG00000020021	Fgd6	13998	FYVE, RhoGEF and PH domain containing 6	0.656971	0.00289125	0.0127802
ENSMUSG00000028901	Gmeb1	56809	glucocorticoid modulatory element binding protein 1	0.656681	0.00429113	0.0174532
ENSMUSG00000034066	Farp2	227377	FERM, RhoGEF and pleckstrin domain protein 2	0.655997	0.0133174	0.043132
ENSMUSG00000061665	Cd2ap	12488	CD2-associated protein	0.655962	5.30183e-05	0.000471192
ENSMUSG00000047910	Pcdhb16	93887	protocadherin beta 16	0.655489	0.0138334	0.0443756
ENSMUSG00000032500	Dclk3	245038	doublecortin-like kinase 3	0.655144	0.0114169	0.0381663
ENSMUSG00000033863	Klf9	16601	Kruppel-like factor 9	0.653977	6.69363e-07	1.22408e-05
ENSMUSG00000031902	Nfatc3	18021	nuclear factor of activated T cells, cytoplasmic, calcineurin dependent 3	0.652992	0.000529239	0.00316865
ENSMUSG00000015755	Tab2	68652	TGF-beta activated kinase 1/MAP3K7 binding protein 2	0.652002	8.79057e-06	0.000106899
ENSMUSG00000048546	Tob2	57259	transducer of ERBB2, 2	0.651768	0.000389254	0.00245379
ENSMUSG00000046743	Fat4	329628	FAT atypical cadherin 4	0.651498	0.000733765	0.00415067
ENSMUSG00000030469	Zfp719	210105	zinc finger protein 719	0.651278	0.000345342	0.0022374
ENSMUSG00000035168	Tanc1	66860	tetratricopeptide repeat, ankyrin repeat and coiled-coil containing 1	0.650628	6.85881e-07	1.24615e-05
ENSMUSG00000046027	Stard5	170460	StAR-related lipid transfer (START) domain containing 5	0.650059	0.0142878	0.0455205
ENSMUSG00000027259	Adal	75894	adenosine deaminase-like	0.64977	0.0104357	0.0354626
ENSMUSG00000021610	Clptm1l	218335	CLPTM1-like	0.648461	9.03898e-05	0.00073197
ENSMUSG00000026019	Wdr12	57750	WD repeat domain 12	0.648069	0.0013655	0.00693513
ENSMUSG00000018800	Abca5	217265	ATP-binding cassette, sub-family A (ABC1), member 5	0.648	9.20754e-05	0.000742236
ENSMUSG00000039427	Alg1	208211	asparagine-linked glycosylation 1 (beta-1,4-mannosyltransferase)	0.647787	0.0153872	0.0482276
ENSMUSG00000030199	Etv6	14011	ets variant 6	0.647631	0.0147969	0.046779
ENSMUSG00000020844	Nxn	18230	nucleoredoxin	0.647541	0.00135171	0.00688597
ENSMUSG00000027748	Trpc4	22066	transient receptor potential cation channel, subfamily C, member 4	0.64729	0.000650015	0.00377346
ENSMUSG00000000560	Gabra2	14395	gamma-aminobutyric acid (GABA) A receptor, subunit alpha 2	0.647233	4.98831e-08	1.34349e-06
ENSMUSG00000033454	Zbtb1	268564	zinc finger and BTB domain containing 1	0.64649	9.03436e-06	0.000109467
ENSMUSG00000030213	Atf7ip	54343	activating transcription factor 7 interacting protein	0.646117	5.3337e-07	1.00953e-05
ENSMUSG00000037736	Limch1	77569	LIM and calponin homology domains 1	0.645662	0.0005426	0.00323826
ENSMUSG00000029456	Acad10	71985	acyl-Coenzyme A dehydrogenase family, member 10	0.645367	0.00213771	0.0100185
ENSMUSG00000043207	Zmpste24	230709	zinc metallopeptidase, STE24	0.64484	0.00218511	0.0101923
ENSMUSG00000022656	Nectin3	58998	nectin cell adhesion molecule 3	0.644681	2.89611e-05	0.000285802
ENSMUSG00000022840	Adcy5	224129	adenylate cyclase 5	0.644608	2.16838e-05	0.000226487
ENSMUSG00000029089	Pacrgl	66768	PARK2 co-regulated-like	0.644178	0.000828278	0.00460319
ENSMUSG00000049755	Zfp672	319475	zinc finger protein 672	0.644076	0.000287501	0.0019263
ENSMUSG00000031156	Slc35a2	22232	solute carrier family 35 (UDP-galactose transporter), member A2	0.644005	0.00181012	0.00876933
ENSMUSG00000039210	Gpatch2	67769	G patch domain containing 2	0.642862	0.000250879	0.00172163
ENSMUSG00000028278	Rragd	52187	Ras-related GTP binding D	0.642384	2.98754e-08	8.6866e-07
ENSMUSG00000028343	Erp44	76299	endoplasmic reticulum protein 44	0.642063	0.00310273	0.0134845
ENSMUSG00000044348	Slc25a53	67062	solute carrier family 25, member 53	0.641429	0.000656092	0.00379955
ENSMUSG00000036777	Anln	68743	anillin, actin binding protein	0.641119	0.0103177	0.0351366
ENSMUSG00000009281	Rarres2	71660	retinoic acid receptor responder (tazarotene induced) 2	0.641088	0.00464292	0.0185474
ENSMUSG00000024924	Vldlr	22359	very low density lipoprotein receptor	0.640904	0.00013763	0.00103583
ENSMUSG00000003847	Nfat5	54446	nuclear factor of activated T cells 5	0.640554	1.32808e-08	4.35082e-07
ENSMUSG00000027175	Tcp11l1	320554	t-complex 11 like 1	0.640264	7.431e-05	0.000621321
ENSMUSG00000014496	Ankrd28	105522	ankyrin repeat domain 28	0.639863	0.000369206	0.00235927
ENSMUSG00000031093	Dock11	75974	dedicator of cytokinesis 11	0.639722	0.0033716	0.0144144
ENSMUSG00000058153	Sez6l	56747	seizure related 6 homolog like	0.638412	4.27918e-05	0.000395577
ENSMUSG00000063873	Slc24a3	94249	solute carrier family 24 (sodium/potassium/calcium exchanger), member 3	0.6384	0.000172793	0.00125333
ENSMUSG00000079157	Fam155a	270028	family with sequence similarity 155, member A	0.638371	3.42338e-09	1.33179e-07
ENSMUSG00000002109	Ddb2	107986	damage specific DNA binding protein 2	0.638058	0.00331245	0.0142376
ENSMUSG00000022529	Zfp263	74120	zinc finger protein 263	0.637451	0.00327224	0.01409
ENSMUSG00000043998	Mgat2	217664	mannoside acetylglucosaminyltransferase 2	0.636746	0.0039359	0.0162548
ENSMUSG00000025321	Itgb8	320910	integrin beta 8	0.635655	0.00188696	0.00906323
ENSMUSG00000024140	Epas1	13819	endothelial PAS domain protein 1	0.635651	0.0139036	0.0445412
ENSMUSG00000040183	Ankrd6	140577	ankyrin repeat domain 6	0.634416	0.000408548	0.0025591
ENSMUSG00000008575	Nfib	18028	nuclear factor I/B	0.63426	3.98791e-09	1.53717e-07
ENSMUSG00000031618	Nr3c2	110784	nuclear receptor subfamily 3, group C, member 2	0.633737	5.08759e-08	1.3615e-06
ENSMUSG00000025921	Rdh10	98711	retinol dehydrogenase 10 (all-trans)	0.633247	0.00232975	0.0107536
ENSMUSG00000027221	Chst1	76969	carbohydrate sulfotransferase 1	0.632451	1.54838e-07	3.52125e-06
ENSMUSG00000048271	Rbm33	381626	RNA binding motif protein 33	0.632189	6.87654e-06	8.6958e-05
ENSMUSG00000062098	Btbd3	228662	BTB (POZ) domain containing 3	0.631174	1.05043e-06	1.78139e-05
ENSMUSG00000027636	Sla2	77799	Src-like-adaptor 2	0.630899	0.000944693	0.00512476
ENSMUSG00000037965	Zc3h7a	106205	zinc finger CCCH type containing 7 A	0.630437	0.00251174	0.0114233
ENSMUSG00000070462	Tlnrd1	80889	talin rod domain containing 1	0.630305	0.0156873	0.0489764
ENSMUSG00000063455	D630045J12Rik	330286	RIKEN cDNA D630045J12 gene	0.630296	0.00237327	0.0109185
ENSMUSG00000033405	Nudt15	214254	nudix (nucleoside diphosphate linked moiety X)-type motif 15	0.62938	0.0115422	0.0385105
ENSMUSG00000040524	Zfp609	214812	zinc finger protein 609	0.628755	1.15178e-06	1.91651e-05
ENSMUSG00000045205	Dpy19l4	381510	dpy-19-like 4 (C. elegans)	0.628549	4.08746e-05	0.0003807
ENSMUSG00000037996	Slc24a2	76376	solute carrier family 24 (sodium/potassium/calcium exchanger), member 2	0.627559	4.0898e-09	1.55505e-07
ENSMUSG00000036046	5031439G07Rik	223739	RIKEN cDNA 5031439G07 gene	0.627248	0.000153032	0.00113198
ENSMUSG00000027340	Slc23a2	54338	solute carrier family 23 (nucleobase transporters), member 2	0.626808	0.000271235	0.00183436
ENSMUSG00000026442	Nfasc	269116	neurofascin	0.626002	3.8567e-05	0.000362504
ENSMUSG00000019960	Dusp6	67603	dual specificity phosphatase 6	0.624994	0.000374393	0.00238335
ENSMUSG00000026116	Tmem131	56030	transmembrane protein 131	0.624663	0.000364133	0.00233128
ENSMUSG00000050556	Kcnb1	16500	potassium voltage gated channel, Shab-related subfamily, member 1	0.624081	2.31871e-05	0.000238798
ENSMUSG00000025239	Limd1	29806	LIM domains containing 1	0.623354	0.00359205	0.0151374
ENSMUSG00000032854	Ugt8a	22239	UDP galactosyltransferase 8A	0.623257	0.0155533	0.0486666
ENSMUSG00000020522	Mfap3	216760	microfibrillar-associated protein 3	0.62316	0.00203619	0.00964765
ENSMUSG00000033039	Micall1	27008	microtubule associated monooxygenase, calponin and LIM domain containing -like 1	0.623071	0.0107864	0.0364592
ENSMUSG00000078429	Ctdsp2	52468	CTD (carboxy-terminal domain, RNA polymerase II, polypeptide A) small phosphatase 2	0.622275	0.0102549	0.0349652
ENSMUSG00000015468	Notch4	18132	notch 4	0.622057	0.0128648	0.0419573
ENSMUSG00000038535	Zfp280d	235469	zinc finger protein 280D	0.621765	1.04567e-06	1.7769e-05
ENSMUSG00000050965	Prkca	18750	protein kinase C, alpha	0.620934	5.16346e-08	1.37742e-06
ENSMUSG00000043051	Disc1	244667	disrupted in schizophrenia 1	0.620859	0.00108724	0.00576407
ENSMUSG00000036585	Fgf1	14164	fibroblast growth factor 1	0.620784	3.30468e-05	0.000318637
ENSMUSG00000054477	Kcnn2	140492	potassium intermediate/small conductance calcium-activated channel, subfamily N, member 2	0.620682	0.00150739	0.00753738
ENSMUSG00000021750	Fam107a	268709	family with sequence similarity 107, member A	0.620015	7.90653e-05	0.000653923
ENSMUSG00000025571	Tnrc6c	217351	trinucleotide repeat containing 6C	0.619267	1.14592e-05	0.000134391
ENSMUSG00000039546	Ajap1	230959	adherens junction associated protein 1	0.619189	0.000487435	0.00296698
ENSMUSG00000039461	Tcta	102791	T cell leukemia translocation altered gene	0.619103	0.00188628	0.00906323
ENSMUSG00000075327	Zbtb2	381990	zinc finger and BTB domain containing 2	0.618638	0.00160113	0.00792129
ENSMUSG00000020620	Abca8b	27404	ATP-binding cassette, sub-family A (ABC1), member 8b	0.618377	0.0087494	0.0308136
ENSMUSG00000033350	Chst2	54371	carbohydrate sulfotransferase 2	0.618351	7.27162e-05	0.000611646
ENSMUSG00000022637	Cblb	208650	Casitas B-lineage lymphoma b	0.618257	4.93612e-06	6.60481e-05
ENSMUSG00000040661	Rad54l2	81000	RAD54 like 2 (S. cerevisiae)	0.618179	0.000362617	0.00232512
ENSMUSG00000031647	Mfap3l	71306	microfibrillar-associated protein 3-like	0.617022	0.000168814	0.00122764
ENSMUSG00000039533	Mmd2	75104	monocyte to macrophage differentiation-associated 2	0.61681	1.08657e-05	0.000128779
ENSMUSG00000022498	Txndc11	106200	thioredoxin domain containing 11	0.616614	0.00978676	0.0337318
ENSMUSG00000047257	Prss45	260408	protease, serine 45	0.615096	0.00122659	0.00638476
ENSMUSG00000016346	Kcnq2	16536	potassium voltage-gated channel, subfamily Q, member 2	0.614655	1.27178e-08	4.2074e-07
ENSMUSG00000041482	Piezo2	667742	piezo-type mechanosensitive ion channel component 2	0.614438	0.00678514	0.0252337
ENSMUSG00000021676	Iqgap2	544963	IQ motif containing GTPase activating protein 2	0.613465	1.56502e-06	2.47196e-05
ENSMUSG00000037808	Fam76b	72826	family with sequence similarity 76, member B	0.613359	0.0148591	0.0469401
ENSMUSG00000048154	Kmt2d	381022	lysine (K)-specific methyltransferase 2D	0.613265	0.00036798	0.00235252
ENSMUSG00000015222	Map2	17756	microtubule-associated protein 2	0.612986	1.51063e-09	6.5942e-08
ENSMUSG00000028906	Epb41	269587	erythrocyte membrane protein band 4.1	0.612888	0.000128111	0.000975104
ENSMUSG00000007617	Homer1	26556	homer scaffolding protein 1	0.611772	3.85066e-07	7.76881e-06
ENSMUSG00000039372	Marchf4	381270	membrane associated ring-CH-type finger 4	0.611611	0.000380156	0.00240928
ENSMUSG00000039629	Strip2	320609	striatin interacting protein 2	0.610514	7.64739e-05	0.000636248
ENSMUSG00000021466	Ptch1	19206	patched 1	0.609976	0.00160636	0.00794015
ENSMUSG00000048833	Slc39a9	328133	solute carrier family 39 (zinc transporter), member 9	0.608113	0.0015661	0.0077869
ENSMUSG00000002341	Ncan	13004	neurocan	0.608106	7.39434e-07	1.32233e-05
ENSMUSG00000047749	Zc3hav1l	209032	zinc finger CCCH-type, antiviral 1-like	0.607523	0.000279723	0.00187966
ENSMUSG00000020524	Gria1	14799	glutamate receptor, ionotropic, AMPA1 (alpha 1)	0.607331	4.00631e-09	1.53721e-07
ENSMUSG00000033377	Palmd	114301	palmdelphin	0.60669	8.54251e-05	0.000696919
ENSMUSG00000004031	Brinp2	240843	bone morphogenic protein/retinoic acid inducible neural-specific 2	0.606426	0.00333839	0.0143125
ENSMUSG00000023473	Celsr3	107934	cadherin, EGF LAG seven-pass G-type receptor 3	0.606318	0.0131647	0.0427364
ENSMUSG00000014353	Tmem87b	72477	transmembrane protein 87B	0.605807	0.00560357	0.0216022
ENSMUSG00000014074	Rnf168	70238	ring finger protein 168	0.605657	1.61239e-05	0.000178275
ENSMUSG00000001674	Ddx18	66942	DEAD box helicase 18	0.605551	0.0146652	0.0464501
ENSMUSG00000074361	C5ar2	319430	complement component 5a receptor 2	0.605331	0.0150409	0.047372
ENSMUSG00000044814	Olfr543	257947	olfactory receptor 543	0.605287	0.0133313	0.0431687
ENSMUSG00000025823	Pdia4	12304	protein disulfide isomerase associated 4	0.604602	0.00105469	0.00561453
ENSMUSG00000022255	Mtdh	67154	metadherin	0.604305	2.78833e-05	0.000276791
ENSMUSG00000044667	Plppr4	229791	phospholipid phosphatase related 4	0.603781	5.56613e-08	1.46621e-06
ENSMUSG00000032456	Nmnat3	74080	nicotinamide nucleotide adenylyltransferase 3	0.603514	0.0147379	0.0466451
ENSMUSG00000068373	D430041D05Rik	241589	RIKEN cDNA D430041D05 gene	0.603402	0.0128793	0.0419801
ENSMUSG00000021360	Gcnt2	14538	glucosaminyl (N-acetyl) transferase 2, I-branching enzyme	0.601164	0.0104171	0.0354179
ENSMUSG00000016481	Cr1l	12946	complement component (3b/4b) receptor 1-like	0.600936	0.00232541	0.0107462
ENSMUSG00000024899	Papss2	23972	3'-phosphoadenosine 5'-phosphosulfate synthase 2	0.600796	0.0158358	0.0492938
ENSMUSG00000066043	Phactr4	100169	phosphatase and actin regulator 4	0.599971	0.00630144	0.0237715
ENSMUSG00000059325	Hopx	74318	HOP homeobox	0.599462	0.000385048	0.00243092
ENSMUSG00000095440	Fignl2	668225	fidgetin-like 2	0.599206	0.00515358	0.020175
ENSMUSG00000034858	Fam214a	235493	family with sequence similarity 214, member A	0.599171	0.00155072	0.00771783
ENSMUSG00000041328	Pcf11	74737	PCF11 cleavage and polyadenylation factor subunit	0.598956	0.00152136	0.00759144
ENSMUSG00000043999	Gpr75	237716	G protein-coupled receptor 75	0.598705	0.00097365	0.00526316
ENSMUSG00000024290	Rock1	19877	Rho-associated coiled-coil containing protein kinase 1	0.598095	0.000100993	0.000801689
ENSMUSG00000039270	Megf9	230316	multiple EGF-like-domains 9	0.597097	0.000259722	0.00177565
ENSMUSG00000021713	Ppwd1	238831	peptidylprolyl isomerase domain and WD repeat containing 1	0.5969	0.00282134	0.0125261
ENSMUSG00000032640	Chsy1	269941	chondroitin sulfate synthase 1	0.59627	0.00708628	0.0260495
ENSMUSG00000063887	Nlgn1	192167	neuroligin 1	0.596125	2.31341e-06	3.4576e-05
ENSMUSG00000061601	Pclo	26875	piccolo (presynaptic cytomatrix protein)	0.596046	9.49232e-08	2.32007e-06
ENSMUSG00000028842	Ago3	214150	argonaute RISC catalytic subunit 3	0.595823	7.87752e-06	9.77045e-05
ENSMUSG00000028907	Utp11	67205	UTP11 small subunit processome component	0.594822	0.00451205	0.0181584
ENSMUSG00000054387	Mdm4	17248	transformed mouse 3T3 cell double minute 4	0.594816	1.85612e-05	0.000199833
ENSMUSG00000030428	Ttyh1	57776	tweety family member 1	0.593463	6.03542e-05	0.000523794
ENSMUSG00000024597	Slc12a2	20496	solute carrier family 12, member 2	0.593206	0.00313931	0.0136047
ENSMUSG00000021843	Ktn1	16709	kinectin 1	0.593039	0.00188193	0.009052
ENSMUSG00000028613	Lrp8	16975	low density lipoprotein receptor-related protein 8, apolipoprotein e receptor	0.59298	0.00121158	0.0063255
ENSMUSG00000021969	Zdhhc20	75965	zinc finger, DHHC domain containing 20	0.592853	0.00202109	0.00958421
ENSMUSG00000069308	H2bc22	319188	H2B clustered histone 22	0.592831	0.00830969	0.0295804
ENSMUSG00000049327	Kmt5a	67956	lysine methyltransferase 5A	0.59247	1.59031e-05	0.000176298
ENSMUSG00000036790	Slitrk2	245450	SLIT and NTRK-like family, member 2	0.591403	0.00351554	0.0148784
ENSMUSG00000027035	Cers6	241447	ceramide synthase 6	0.591155	8.89795e-05	0.00072241
ENSMUSG00000015461	Atf6b	12915	activating transcription factor 6 beta	0.591022	0.00481363	0.0190977
ENSMUSG00000034912	Mdga2	320772	MAM domain containing glycosylphosphatidylinositol anchor 2	0.590656	1.19053e-05	0.000138752
ENSMUSG00000056493	Foxk1	17425	forkhead box K1	0.590098	0.000510311	0.00307725
ENSMUSG00000013076	Amotl1	75723	angiomotin-like 1	0.589942	0.000174206	0.00126171
ENSMUSG00000032340	Neo1	18007	neogenin	0.589622	0.00123439	0.00641718
ENSMUSG00000034610	Tut4	230594	terminal uridylyl transferase 4	0.589483	0.000105687	0.000831935
ENSMUSG00000041308	Sntb2	20650	syntrophin, basic 2	0.588859	1.57746e-05	0.000175105
ENSMUSG00000042686	Jph1	57339	junctophilin 1	0.58851	5.23793e-06	6.94233e-05
ENSMUSG00000028053	Ash1l	192195	ASH1 like histone lysine methyltransferase	0.587705	4.86737e-08	1.31925e-06
ENSMUSG00000032743	D430042O09Rik	233865	RIKEN cDNA D430042O09 gene	0.587626	0.012901	0.0420183
ENSMUSG00000028414	Fktn	246179	fukutin	0.587477	4.37453e-06	5.99172e-05
ENSMUSG00000020422	Tns3	319939	tensin 3	0.587377	0.00261257	0.0117713
ENSMUSG00000060012	Kif13b	16554	kinesin family member 13B	0.586269	0.00205327	0.00970396
ENSMUSG00000033004	Mycbp2	105689	MYC binding protein 2, E3 ubiquitin protein ligase	0.58578	4.63724e-06	6.26978e-05
ENSMUSG00000030201	Lrp6	16974	low density lipoprotein receptor-related protein 6	0.585765	6.70297e-07	1.22446e-05
ENSMUSG00000062169	Cnih4	98417	cornichon family AMPA receptor auxiliary protein 4	0.584711	0.00117791	0.00616887
ENSMUSG00000015882	Lcorl	209707	ligand dependent nuclear receptor corepressor-like	0.583746	0.000542861	0.00323867
ENSMUSG00000047414	Flrt2	399558	fibronectin leucine rich transmembrane protein 2	0.582408	6.08812e-05	0.000526322
ENSMUSG00000035311	Gnptab	432486	N-acetylglucosamine-1-phosphate transferase, alpha and beta subunits	0.581757	0.000118762	0.000915974
ENSMUSG00000037300	Ttc13	234875	tetratricopeptide repeat domain 13	0.581573	0.0108985	0.0367422
ENSMUSG00000015189	Casd1	213819	CAS1 domain containing 1	0.581315	7.77813e-05	0.00064489
ENSMUSG00000038764	Ptpn3	545622	protein tyrosine phosphatase, non-receptor type 3	0.580891	0.000675831	0.00388973
ENSMUSG00000043602	Zfp3	193043	zinc finger protein 3	0.580275	0.00274999	0.0122687
ENSMUSG00000040865	Ino80d	227195	INO80 complex subunit D	0.580252	2.16017e-06	3.25594e-05
ENSMUSG00000041607	Mbp	17196	myelin basic protein	0.58013	0.00513435	0.0201091
ENSMUSG00000032449	Slc25a36	192287	solute carrier family 25, member 36	0.580101	6.62249e-06	8.43163e-05

## Sheet: vMC
Ensemble_ID	Gene_Symbol	Gene_ID	Description	log2FC	p-value	FDR
ENSMUSG00000003657	Calb2	12308	calbindin 2	-3.22186	2.96072e-99	4.97578e-95
ENSMUSG00000045648	Vwc2l	320460	von Willebrand factor C domain-containing protein 2-like	-2.87563	2.28779e-21	1.13084e-18
ENSMUSG00000079042	Apela	100038489	apelin receptor early endogenous ligand	-2.87307	1.98288e-05	0.000211047
ENSMUSG00000044937	Ttc41	103220	tetratricopeptide repeat domain 41	-2.67096	5.06486e-05	0.000454904
ENSMUSG00000044220	Nkx2-3	18089	NK2 homeobox 3	-2.37864	0.00201619	0.00956636
ENSMUSG00000042514	Klhl14	225266	kelch-like 14	-2.37622	1.52099e-13	2.02871e-11
ENSMUSG00000023882	Zfp54	22712	zinc finger protein 54	-2.25226	5.14664e-10	2.5666e-08
ENSMUSG00000025268	Maged2	80884	melanoma antigen, family D, 2	-2.24083	5.98326e-08	1.55657e-06
ENSMUSG00000020173	Cobl	12808	cordon-bleu WH2 repeat	-2.23723	1.47262e-19	5.15602e-17
ENSMUSG00000011751	Sptbn4	80297	spectrin beta, non-erythrocytic 4	-2.23495	0.000977136	0.00527352
ENSMUSG00000047228	A2ml1	232400	alpha-2-macroglobulin like 1	-2.16068	3.51358e-22	1.96831e-19
ENSMUSG00000029334	Prkg2	19092	protein kinase, cGMP-dependent, type II	-2.12741	1.28374e-10	7.89621e-09
ENSMUSG00000064330	Pde6h	78600	phosphodiesterase 6H, cGMP-specific, cone, gamma	-2.12171	5.32177e-07	1.00945e-05
ENSMUSG00000030314	Atg7	74244	autophagy related 7	-2.12028	3.86899e-38	2.16741e-34
ENSMUSG00000034706	Dnaic2	432611	dynein, axonemal, intermediate chain 2	-2.08308	6.37165e-07	1.17286e-05
ENSMUSG00000040605	Bace2	56175	beta-site APP-cleaving enzyme 2	-2.06966	2.36352e-09	9.66455e-08
ENSMUSG00000025888	Casp1	12362	caspase 1	-2.05939	1.52575e-10	9.15777e-09
ENSMUSG00000070469	Adamtsl3	269959	ADAMTS-like 3	-2.04258	0.00132547	0.00678561
ENSMUSG00000021572	Cep72	74470	centrosomal protein 72	-1.98636	4.13269e-06	5.72109e-05
ENSMUSG00000046731	Kctd11	216858	potassium channel tetramerisation domain containing 11	-1.97013	0.00065262	0.00378335
ENSMUSG00000020892	Aloxe3	23801	arachidonate lipoxygenase 3	-1.96255	1.30588e-05	0.000149196
ENSMUSG00000067786	Nnat	18111	neuronatin	-1.95416	8.08281e-08	2.01244e-06
ENSMUSG00000042498	Radx	102871	RPA1 related single stranded DNA binding protein, X-linked	-1.93188	8.16524e-06	0.000100679
ENSMUSG00000050702	4930563M21Rik	75258	RIKEN cDNA 4930563M21 gene	-1.93098	0.00608253	0.0231378
ENSMUSG00000025963	Mdh1b	76668	malate dehydrogenase 1B, NAD (soluble)	-1.93011	1.10352e-05	0.000130262
ENSMUSG00000026405	C4bp	12269	complement component 4 binding protein	-1.89937	5.44891e-05	0.000482478
ENSMUSG00000021998	Lcp1	18826	lymphocyte cytosolic protein 1	-1.88717	9.13872e-07	1.5704e-05
ENSMUSG00000028453	Fancg	60534	Fanconi anemia, complementation group G	-1.8852	1.49888e-05	0.000167599
ENSMUSG00000018672	Copz2	56358	coatomer protein complex, subunit zeta 2	-1.88105	1.09629e-08	3.72961e-07
ENSMUSG00000020042	Btbd11	74007	BTB (POZ) domain containing 11	-1.84208	1.33138e-08	4.35314e-07
ENSMUSG00000027198	Ext2	14043	exostosin glycosyltransferase 2	-1.83828	0.000330189	0.00215231
ENSMUSG00000028294	Cfap206	69329	cilia and flagella associated protein 206	-1.82113	0.00469573	0.0187227
ENSMUSG00000032204	Aqp9	64008	aquaporin 9	-1.79975	0.00319565	0.0138097
ENSMUSG00000022432	Smc1b	140557	structural maintenance of chromosomes 1B	-1.78744	6.06834e-08	1.57383e-06
ENSMUSG00000044308	Ubr3	68795	ubiquitin protein ligase E3 component n-recognin 3	-1.78569	1.61661e-14	2.58749e-12
ENSMUSG00000050926	Dcaf12l2	245403	DDB1 and CUL4 associated factor 12-like 2	-1.7838	1.98227e-08	6.07921e-07
ENSMUSG00000019997	Ccn2	14219	cellular communication network factor 2	-1.77724	5.24142e-05	0.000467058
ENSMUSG00000051354	Samd3	268288	sterile alpha motif domain containing 3	-1.77278	0.00132273	0.00677531
ENSMUSG00000024907	Gal	14419	galanin and GMAP prepropeptide	-1.77233	3.47941e-08	9.86086e-07
ENSMUSG00000062646	Ganc	76051	glucosidase, alpha; neutral C	-1.77145	1.3693e-05	0.000154862
ENSMUSG00000070873	Lilra5	232801	leukocyte immunoglobulin-like receptor, subfamily A (with TM domain), member 5	-1.76817	0.0158156	0.0492399
ENSMUSG00000032377	Plscr4	235527	phospholipid scramblase 4	-1.7508	1.66271e-07	3.74577e-06
ENSMUSG00000040282	BC052040	399568	cDNA sequence BC052040	-1.73808	2.96863e-13	3.72319e-11
ENSMUSG00000044726	Erich5	239368	glutamate rich 5	-1.73711	0.00226037	0.0104852
ENSMUSG00000044816	D630023F18Rik	98303	RIKEN cDNA D630023F18 gene	-1.73682	3.64568e-05	0.000347135
ENSMUSG00000027463	Slc52a3	69698	solute carrier protein family 52, member 3	-1.73655	5.86289e-07	1.09387e-05
ENSMUSG00000059395	Nkapl	66707	NFKB activating protein-like	-1.71863	0.00220988	0.0102737
ENSMUSG00000039081	Zfp503	218820	zinc finger protein 503	-1.70533	2.21137e-05	0.000230167
ENSMUSG00000067878	Map7d3	320923	MAP7 domain containing 3	-1.69684	0.000143855	0.00107402
ENSMUSG00000026479	Lamc2	16782	laminin, gamma 2	-1.69616	0.00254341	0.0115339
ENSMUSG00000055775	Myh8	17885	myosin, heavy polypeptide 8, skeletal muscle, perinatal	-1.69349	1.12557e-05	0.000132292
ENSMUSG00000021965	Ska3	219114	spindle and kinetochore associated complex subunit 3	-1.67574	4.8788e-08	1.31925e-06
ENSMUSG00000074500	Zfp558	72230	zinc finger protein 558	-1.67394	0.0001365	0.00102779
ENSMUSG00000032040	Dcps	69305	decapping enzyme, scavenger	-1.64328	1.95428e-09	8.25215e-08
ENSMUSG00000045314	Sowahb	78088	sosondowah ankyrin repeat domain family member B	-1.64287	7.28812e-08	1.84187e-06
ENSMUSG00000022372	Sla	20491	src-like adaptor	-1.63286	1.76454e-06	2.73316e-05
ENSMUSG00000028607	Cpt2	12896	carnitine palmitoyltransferase 2	-1.62689	0.000310727	0.00204948
ENSMUSG00000032085	Tagln	21345	transgelin	-1.62642	0.00595	0.0227057
ENSMUSG00000038112	AW551984	244810	expressed sequence AW551984	-1.62043	0.000312517	0.00205725
ENSMUSG00000031958	Ldhd	52815	lactate dehydrogenase D	-1.61491	5.05706e-08	1.35549e-06
ENSMUSG00000026414	Tnnt2	21956	troponin T2, cardiac	-1.60398	1.35568e-05	0.000153528
ENSMUSG00000015837	Sqstm1	18412	sequestosome 1	-1.59903	1.82618e-42	1.53454e-38
ENSMUSG00000002804	Nudt14	66174	nudix (nucleoside diphosphate linked moiety X)-type motif 14	-1.59385	3.83088e-06	5.37096e-05
ENSMUSG00000089665	Fcor	100503924	Foxo1 corepressor	-1.58818	6.86203e-05	0.000582735
ENSMUSG00000029314	Gpat3	231510	glycerol-3-phosphate acyltransferase 3	-1.58791	6.4142e-05	0.000549912
ENSMUSG00000049565	Aknad1	329738	AKNA domain containing 1	-1.58674	0.00130706	0.00671552
ENSMUSG00000103906	Tigd5	105734	tigger transposable element derived 5	-1.5855	9.15516e-10	4.23861e-08
ENSMUSG00000026971	Itgb6	16420	integrin beta 6	-1.57689	0.00012237	0.000937906
ENSMUSG00000037493	Cib2	56506	calcium and integrin binding family member 2	-1.57677	8.12839e-13	9.10704e-11
ENSMUSG00000019929	Dcn	13179	decorin	-1.57104	1.68577e-06	2.63545e-05
ENSMUSG00000051235	Gen1	209334	GEN1, Holliday junction 5' flap endonuclease	-1.57103	0.000860383	0.0047502
ENSMUSG00000056947	Mab21l1	17116	mab-21-like 1	-1.57028	4.02793e-07	8.08763e-06
ENSMUSG00000028699	Tspan1	66805	tetraspanin 1	-1.56778	0.00028663	0.00192146
ENSMUSG00000040536	Necab1	69352	N-terminal EF-hand calcium binding protein 1	-1.56427	1.06588e-22	6.17697e-20
ENSMUSG00000039706	Ldb2	16826	LIM domain binding 2	-1.54195	9.96572e-30	2.39263e-26
ENSMUSG00000073209	Klf14	619665	Kruppel-like factor 14	-1.54081	0.000152484	0.00112842
ENSMUSG00000010311	Optc	269120	opticin	-1.53864	0.000299404	0.00198891
ENSMUSG00000032332	Col12a1	12816	collagen, type XII, alpha 1	-1.53558	1.08908e-05	0.000128804
ENSMUSG00000046550	Spin2c	278240	spindlin family, member 2C	-1.53189	4.46438e-13	5.35917e-11
ENSMUSG00000063488	Zkscan7	382118	zinc finger with KRAB and SCAN domains 7	-1.53133	0.00769362	0.0278122
ENSMUSG00000066197	Gpr139	209776	G protein-coupled receptor 139	-1.51605	0.000528776	0.00316701
ENSMUSG00000073436	Eme2	193838	essential meiotic structure-specific endonuclease subunit 2	-1.51521	8.50138e-08	2.1034e-06
ENSMUSG00000021250	Fos	14281	FBJ osteosarcoma oncogene	-1.51264	2.24969e-07	4.91018e-06
ENSMUSG00000034796	Cpne7	102278	copine VII	-1.50826	1.2283e-16	2.5485e-14
ENSMUSG00000031937	Vstm5	69137	V-set and transmembrane domain containing 5	-1.50614	2.03939e-06	3.09612e-05
ENSMUSG00000057933	Gsta2	14858	glutathione S-transferase, alpha 2 (Yc2)	-1.50102	1.11077e-11	9.10614e-10
ENSMUSG00000026798	Coq4	227683	coenzyme Q4	-1.49724	3.94059e-10	2.05669e-08
ENSMUSG00000061132	Blnk	17060	B cell linker	-1.49312	4.19606e-05	0.000388963
ENSMUSG00000006179	Prss16	54373	protease, serine 16 (thymus)	-1.49281	0.00170766	0.00835241
ENSMUSG00000050390	C77080	97130	expressed sequence C77080	-1.49227	8.70832e-05	0.000709414
ENSMUSG00000030111	A2m	232345	alpha-2-macroglobulin	-1.48295	5.44083e-06	7.18857e-05
ENSMUSG00000045725	Prr15	78004	proline rich 15	-1.4807	2.17756e-06	3.27923e-05
ENSMUSG00000025592	Dach2	93837	dachshund family transcription factor 2	-1.47997	0.000320551	0.00210191
ENSMUSG00000039115	Itga9	104099	integrin alpha 9	-1.47855	0.00518678	0.020286
ENSMUSG00000062861	Zfp28	22690	zinc finger protein 28	-1.47705	2.58895e-07	5.53587e-06
ENSMUSG00000030069	Prok2	50501	prokineticin 2	-1.47575	8.5106e-06	0.000104021
ENSMUSG00000050022	Amz1	231842	archaelysin family metallopeptidase 1	-1.47043	9.54648e-06	0.000114845
ENSMUSG00000032431	Crtap	56693	cartilage associated protein	-1.46836	2.47795e-05	0.000251325
ENSMUSG00000052014	A330070K13Rik	381673	RIKEN cDNA A330070K13 gene	-1.46613	7.59618e-05	0.000633241
ENSMUSG00000023249	Parp3	235587	poly (ADP-ribose) polymerase family, member 3	-1.45737	8.45586e-07	1.47319e-05
ENSMUSG00000039384	Dusp10	63953	dual specificity phosphatase 10	-1.45445	3.37217e-06	4.83143e-05
ENSMUSG00000060244	Alyref2	56009	Aly/REF export factor 2	-1.44921	8.16264e-05	0.000669831
ENSMUSG00000005968	Tuft1	22156	tuftelin 1	-1.44624	6.71371e-08	1.71736e-06
ENSMUSG00000040723	Rcsd1	226594	RCSD domain containing 1	-1.44549	0.0047175	0.0187962
ENSMUSG00000035394	Cfap53	74453	cilia and flagella associated protein 53	-1.44367	5.49062e-05	0.000484322
ENSMUSG00000068615	Gjd2	14617	gap junction protein, delta 2	-1.43368	1.29522e-08	4.27653e-07
ENSMUSG00000075271	Ttc30a1	78802	tetratricopeptide repeat domain 30A1	-1.42772	4.7527e-05	0.000432686
ENSMUSG00000002763	Pex6	224824	peroxisomal biogenesis factor 6	-1.42139	0.000991731	0.00533516
ENSMUSG00000000058	Cav2	12390	caveolin 2	-1.41581	8.05887e-11	5.16937e-09
ENSMUSG00000022849	Hspbap1	66667	Hspb associated protein 1	-1.41522	2.64907e-05	0.000265826
ENSMUSG00000039623	Ap5z1	231855	adaptor-related protein complex 5, zeta 1 subunit	-1.41464	1.05329e-06	1.78444e-05
ENSMUSG00000056162	Cndp1	338403	carnosine dipeptidase 1 (metallopeptidase M20 family)	-1.41045	0.0044971	0.018133
ENSMUSG00000020080	Hkdc1	216019	hexokinase domain containing 1	-1.40692	1.46359e-08	4.73241e-07
ENSMUSG00000051627	H1f4	50709	H1.4 linker histone, cluster member	-1.40375	0.000345652	0.00223854
ENSMUSG00000039496	Cdnf	227526	cerebral dopamine neurotrophic factor	-1.39525	1.11559e-06	1.85997e-05
ENSMUSG00000032387	Rbpms2	71973	RNA binding protein with multiple splicing 2	-1.39497	8.1072e-09	2.84446e-07
ENSMUSG00000019718	L3hypdh	67217	L-3-hydroxyproline dehydratase (trans-)	-1.39222	1.51774e-06	2.41317e-05
ENSMUSG00000033722	BC034090	207792	cDNA sequence BC034090	-1.38869	0.00435098	0.0176582
ENSMUSG00000023008	Fmnl3	22379	formin-like 3	-1.38785	0.0100912	0.0345123
ENSMUSG00000031803	B3gnt3	72297	UDP-GlcNAc:betaGal beta-1,3-N-acetylglucosaminyltransferase 3	-1.38752	2.23455e-05	0.000231985
ENSMUSG00000053153	Spag16	66722	sperm associated antigen 16	-1.38253	0.000292245	0.00195442
ENSMUSG00000058022	Adtrp	109254	androgen dependent TFPI regulating protein	-1.37861	0.000350286	0.00226507
ENSMUSG00000059883	Irak4	266632	interleukin-1 receptor-associated kinase 4	-1.37657	0.014114	0.0450522
ENSMUSG00000027824	Vmn2r1	56544	vomeronasal 2, receptor 1	-1.37053	2.5987e-06	3.84452e-05
ENSMUSG00000028862	Map3k6	53608	mitogen-activated protein kinase kinase kinase 6	-1.36657	9.18683e-05	0.000741517
ENSMUSG00000033285	Wdr3	269470	WD repeat domain 3	-1.36498	2.19995e-05	0.000229357
ENSMUSG00000000792	Slc5a5	114479	solute carrier family 5 (sodium iodide symporter), member 5	-1.36105	1.77867e-10	1.04519e-08
ENSMUSG00000044770	Scml4	268297	Scm polycomb group protein like 4	-1.36079	7.21795e-06	9.03911e-05
ENSMUSG00000022076	Klhl1	93688	kelch-like 1	-1.35644	0.000715623	0.00407135
ENSMUSG00000011658	Fuz	70300	fuzzy planar cell polarity protein	-1.35641	2.69158e-07	5.71867e-06
ENSMUSG00000024647	Cbln2	12405	cerebellin 2 precursor protein	-1.35428	0.000127536	0.000972052
ENSMUSG00000046561	Arsj	271970	arylsulfatase J	-1.34992	0.00668581	0.024936
ENSMUSG00000032338	Hcn4	330953	hyperpolarization-activated, cyclic nucleotide-gated K+ 4	-1.34562	4.39631e-05	0.000404624
ENSMUSG00000022126	Acod1	16365	aconitate decarboxylase 1	-1.33819	0.000149754	0.00111066
ENSMUSG00000078931	Pdf	68023	peptide deformylase (mitochondrial)	-1.33713	2.78673e-05	0.000276791
ENSMUSG00000079388	2610042L04Rik	554327	RIKEN cDNA 2610042L04 gene	-1.33686	4.53551e-07	8.86324e-06
ENSMUSG00000027323	Rad51	19361	RAD51 recombinase	-1.33613	5.68839e-09	2.08356e-07
ENSMUSG00000042284	Itga1	109700	integrin alpha 1	-1.33411	0.00329741	0.0141875
ENSMUSG00000022179	4931414P19Rik	74359	RIKEN cDNA 4931414P19 gene	-1.32966	0.00588852	0.022517
ENSMUSG00000032531	Amotl2	56332	angiomotin-like 2	-1.32965	0.00419764	0.017156
ENSMUSG00000008167	Fbxw9	68628	F-box and WD-40 domain protein 9	-1.32876	7.80334e-06	9.69275e-05
ENSMUSG00000017868	Sgk2	27219	serum/glucocorticoid regulated kinase 2	-1.31726	0.0115844	0.0386131
ENSMUSG00000058385	H2bc8	319181	H2B clustered histone 8	-1.31648	0.00420973	0.0171971
ENSMUSG00000007207	Stx1a	20907	syntaxin 1A (brain)	-1.315	3.99003e-11	2.82939e-09
ENSMUSG00000072774	Zfp951	626391	zinc finger protein 951	-1.31471	0.00085903	0.00474584
ENSMUSG00000020228	Helb	117599	helicase (DNA) B	-1.31161	6.73539e-06	8.55532e-05
ENSMUSG00000034906	Ncaph	215387	non-SMC condensin I complex, subunit H	-1.31099	0.00799704	0.0286563
ENSMUSG00000005973	Rcn1	19672	reticulocalbin 1	-1.30957	0.00589754	0.0225388
ENSMUSG00000047867	Gimap6	231931	GTPase, IMAP family member 6	-1.30372	0.000365985	0.00234135
ENSMUSG00000019312	Grb7	14786	growth factor receptor bound protein 7	-1.30353	1.42236e-06	2.29407e-05
ENSMUSG00000030500	Slc17a6	140919	solute carrier family 17 (sodium-dependent inorganic phosphate cotransporter), member 6	-1.30338	1.98302e-12	1.92639e-10
ENSMUSG00000060224	Pyroxd2	74580	pyridine nucleotide-disulphide oxidoreductase domain 2	-1.30119	0.000255321	0.00174926
ENSMUSG00000037362	Ccn3	18133	cellular communication network factor 3	-1.30018	1.35172e-08	4.41108e-07
ENSMUSG00000104148	Pcdha2	353234	protocadherin alpha 2	-1.29903	1.67607e-05	0.000184225
ENSMUSG00000005107	Slc2a9	117591	solute carrier family 2 (facilitated glucose transporter), member 9	-1.29834	0.00706021	0.025975
ENSMUSG00000048772	Tmem53	68777	transmembrane protein 53	-1.2931	0.000974305	0.00526501
ENSMUSG00000027560	Dok5	76829	docking protein 5	-1.29237	1.10897e-11	9.10614e-10
ENSMUSG00000105993	Tex13d	100039899	TEX13 family member D	-1.28877	0.00191451	0.00918506
ENSMUSG00000032269	Htr3a	15561	5-hydroxytryptamine (serotonin) receptor 3A	-1.28139	9.95867e-08	2.40868e-06
ENSMUSG00000042515	Pwwp3b	245631	PWWP domain containing 3B	-1.2809	0.00343952	0.0146223
ENSMUSG00000075040	Zfp408	381410	zinc finger protein 408	-1.2804	2.10087e-05	0.000220808
ENSMUSG00000030909	Anks4b	72074	ankyrin repeat and sterile alpha motif domain containing 4B	-1.2775	0.00129403	0.00666079
ENSMUSG00000026604	Ptpn14	19250	protein tyrosine phosphatase, non-receptor type 14	-1.27648	0.000256974	0.00175914
ENSMUSG00000022671	Mzt2	72083	mitotic spindle organizing protein 2	-1.27547	2.75709e-09	1.10061e-07
ENSMUSG00000092094	Zfp804b	207618	zinc finger protein 804B	-1.27202	0.000237182	0.00164104
ENSMUSG00000040919	4930505A04Rik	75087	RIKEN cDNA 4930505A04 gene	-1.27089	0.00303107	0.0132394
ENSMUSG00000056215	Lrguk	74354	leucine-rich repeats and guanylate kinase domain containing	-1.26659	5.03159e-08	1.35297e-06
ENSMUSG00000092417	Gpank1	81845	G patch domain and ankyrin repeats 1	-1.26454	2.21329e-05	0.000230177
ENSMUSG00000078853	Igtp	16145	interferon gamma induced GTPase	-1.26384	5.77385e-06	7.55727e-05
ENSMUSG00000020374	Rasgef1c	74563	RasGEF domain family, member 1C	-1.26379	1.12566e-05	0.000132292
ENSMUSG00000019768	Esr1	13982	estrogen receptor 1 (alpha)	-1.26035	0.00524921	0.0204921
ENSMUSG00000055912	Tmem150a	232086	transmembrane protein 150A	-1.2603	4.45447e-06	6.08633e-05
ENSMUSG00000028600	Podn	242608	podocan	-1.26011	0.00134388	0.00685441
ENSMUSG00000028182	Lrriq3	74435	leucine-rich repeats and IQ motif containing 3	-1.25741	2.31654e-05	0.000238798
ENSMUSG00000021125	Arg2	11847	arginase type II	-1.25456	0.00532824	0.020757
ENSMUSG00000043668	Tox3	244579	TOX high mobility group box family member 3	-1.25368	5.80499e-06	7.58621e-05
ENSMUSG00000066357	Wdr6	83669	WD repeat domain 6	-1.25284	2.50297e-08	7.43197e-07
ENSMUSG00000028334	Nans	94181	N-acetylneuraminic acid synthase (sialic acid synthase)	-1.25251	1.19329e-05	0.00013889
ENSMUSG00000030088	Aldh1l1	107747	aldehyde dehydrogenase 1 family, member L1	-1.24849	0.00313113	0.0135833
ENSMUSG00000026209	Dnpep	13437	aspartyl aminopeptidase	-1.24709	5.088e-07	9.72797e-06
ENSMUSG00000034872	Gipc3	209047	GIPC PDZ domain containing family, member 3	-1.24465	0.000125257	0.000957287
ENSMUSG00000022571	Pycrl	66194	pyrroline-5-carboxylate reductase-like	-1.24213	1.56509e-05	0.000174076
ENSMUSG00000033735	Spr	20751	sepiapterin reductase	-1.24012	4.34207e-12	3.88154e-10
ENSMUSG00000036913	Trim67	330863	tripartite motif-containing 67	-1.23741	0.000192885	0.00137415
ENSMUSG00000050211	Pla2g4e	329502	phospholipase A2, group IVE	-1.23478	0.00259044	0.0116998
ENSMUSG00000039714	Cplx3	235415	complexin 3	-1.2309	9.49218e-08	2.32007e-06
ENSMUSG00000029276	Glmn	170823	glomulin, FKBP associated protein	-1.22568	2.35807e-05	0.000241498
ENSMUSG00000031487	Brf2	66653	BRF2, RNA polymerase III transcription initiation factor 50kDa subunit	-1.22555	0.000107362	0.000840006
ENSMUSG00000034429	Zfp707	69020	zinc finger protein 707	-1.22479	2.21182e-05	0.000230167
ENSMUSG00000030669	Calca	12310	calcitonin/calcitonin-related polypeptide, alpha	-1.2228	5.92409e-05	0.000515857
ENSMUSG00000028755	Cda	72269	cytidine deaminase	-1.21556	0.00015027	0.00111351
ENSMUSG00000035351	Nup37	69736	nucleoporin 37	-1.21526	0.00727828	0.026591
ENSMUSG00000026415	Fcamr	64435	Fc receptor, IgA, IgM, high affinity	-1.21477	4.91498e-05	0.000443422
ENSMUSG00000047953	Gp5	14729	glycoprotein 5 (platelet)	-1.2135	4.13592e-05	0.000384236
ENSMUSG00000058420	Syt17	110058	synaptotagmin XVII	-1.21268	4.2482e-08	1.1685e-06
ENSMUSG00000036932	Aifm1	26926	apoptosis-inducing factor, mitochondrion-associated 1	-1.21221	1.18851e-06	1.96789e-05
ENSMUSG00000070780	Rbm47	245945	RNA binding motif protein 47	-1.21053	0.00622745	0.0235771
ENSMUSG00000030400	Ercc2	13871	excision repair cross-complementing rodent repair deficiency, complementation group 2	-1.20771	0.000298326	0.00198482
ENSMUSG00000030551	Nr2f2	11819	nuclear receptor subfamily 2, group F, member 2	-1.20694	2.15175e-15	3.80655e-13
ENSMUSG00000028393	Alad	17025	aminolevulinate, delta-, dehydratase	-1.20678	0.000122387	0.000937906
ENSMUSG00000029123	Stk32b	64293	serine/threonine kinase 32B	-1.20603	3.05966e-06	4.44048e-05
ENSMUSG00000022022	Mtrf1	211253	mitochondrial translational release factor 1	-1.20389	2.4868e-06	3.69524e-05
ENSMUSG00000025533	Asl	109900	argininosuccinate lyase	-1.20232	0.000559679	0.00332837
ENSMUSG00000061482	H4c4	319156	H4 clustered histone 4	-1.20121	0.0151358	0.0476103
ENSMUSG00000035799	Twist1	22160	twist basic helix-loop-helix transcription factor 1	-1.20068	0.000116962	0.000905001
ENSMUSG00000036975	Tmem177	66343	transmembrane protein 177	-1.20019	1.63192e-08	5.19432e-07
ENSMUSG00000018126	Baiap2l2	207495	BAI1-associated protein 2-like 2	-1.19817	5.85769e-06	7.6432e-05
ENSMUSG00000045509	Gpr150	238725	G protein-coupled receptor 150	-1.19795	0.000507942	0.00306626
ENSMUSG00000048483	Zdhhc22	238331	zinc finger, DHHC-type containing 22	-1.1957	0.000362908	0.0023261
ENSMUSG00000037904	Ankrd9	74251	ankyrin repeat domain 9	-1.1945	0.000175857	0.001271
ENSMUSG00000020912	Krt12	268482	keratin 12	-1.19347	7.3943e-05	0.000618868
ENSMUSG00000060275	Nrg2	100042150	neuregulin 2	-1.19064	0.00634173	0.0238913
ENSMUSG00000023055	Calcoco1	67488	calcium binding and coiled coil domain 1	-1.18887	7.15706e-16	1.32178e-13
ENSMUSG00000020639	Pfn4	382562	profilin family, member 4	-1.18801	1.42855e-06	2.30184e-05
ENSMUSG00000019102	Aldh3a1	11670	aldehyde dehydrogenase family 3, subfamily A1	-1.18775	1.472e-07	3.38882e-06
ENSMUSG00000028337	Coro2a	107684	coronin, actin binding protein 2A	-1.18665	1.68987e-06	2.6394e-05
ENSMUSG00000002266	Zim1	22776	zinc finger, imprinted 1	-1.18575	6.06526e-06	7.85307e-05
ENSMUSG00000070803	Cited4	56222	Cbp/p300-interacting transactivator, with Glu/Asp-rich carboxy-terminal domain, 4	-1.18433	1.62742e-06	2.55373e-05
ENSMUSG00000042854	Trp53rkb	76367	transformation related protein 53 regulating kinase B	-1.18211	7.28495e-05	0.000611848
ENSMUSG00000045757	Zfp764	233893	zinc finger protein 764	-1.17715	9.00446e-05	0.000730218
ENSMUSG00000045827	Serpinb9	20723	serine (or cysteine) peptidase inhibitor, clade B, member 9	-1.17464	1.44469e-09	6.32279e-08
ENSMUSG00000037349	Nudt22	68323	nudix (nucleoside diphosphate linked moiety X)-type motif 22	-1.17337	0.000132612	0.00100359
ENSMUSG00000031521	Aga	11593	aspartylglucosaminidase	-1.17222	0.000169767	0.00123404
ENSMUSG00000034009	Rxfp1	381489	relaxin/insulin-like family peptide receptor 1	-1.17198	2.93967e-08	8.5771e-07
ENSMUSG00000026333	Gin1	252876	gypsy retrotransposon integrase 1	-1.16875	1.11927e-05	0.00013191
ENSMUSG00000030888	Rrp8	101867	ribosomal RNA processing 8, methyltransferase, homolog (yeast)	-1.16874	4.50781e-08	1.23184e-06
ENSMUSG00000058400	Qrfpr	229214	pyroglutamylated RFamide peptide receptor	-1.16558	3.28403e-06	4.73339e-05
ENSMUSG00000044551	9930012K11Rik	268759	RIKEN cDNA 9930012K11 gene	-1.16533	0.00211509	0.00993188
ENSMUSG00000040219	Ttc12	235330	tetratricopeptide repeat domain 12	-1.16337	0.00416835	0.0170487
ENSMUSG00000040770	Il25	140806	interleukin 25	-1.16289	0.00684603	0.0253956
ENSMUSG00000037278	Tmem97	69071	transmembrane protein 97	-1.16279	0.000427455	0.00265477
ENSMUSG00000021278	Amn	93835	amnionless	-1.1618	0.000897607	0.00490894
ENSMUSG00000051396	Hspa14	50497	heat shock protein 14	-1.16057	6.22326e-05	0.000536075
ENSMUSG00000074064	Mlycd	56690	malonyl-CoA decarboxylase	-1.16025	1.78755e-08	5.61524e-07
ENSMUSG00000059714	Flot1	14251	flotillin 1	-1.15993	8.92194e-06	0.000108183
ENSMUSG00000054474	Thnsl2	232078	threonine synthase-like 2 (bacterial)	-1.15985	0.00023295	0.00161642
ENSMUSG00000008822	Acyp1	66204	acylphosphatase 1, erythrocyte (common) type	-1.15718	2.3197e-10	1.31262e-08
ENSMUSG00000014856	Tmem208	66320	transmembrane protein 208	-1.15529	3.09044e-05	0.000301965
ENSMUSG00000043029	Trpv3	246788	transient receptor potential cation channel, subfamily V, member 3	-1.1551	0.000857277	0.00473772
ENSMUSG00000030862	Cpxm2	55987	carboxypeptidase X 2 (M14 family)	-1.15447	2.31979e-05	0.000238798
ENSMUSG00000062372	Otof	83762	otoferlin	-1.15402	0.00118128	0.00618077
ENSMUSG00000051136	Ghsr	208188	growth hormone secretagogue receptor	-1.154	0.0037002	0.0155192
ENSMUSG00000001300	Efnb2	13642	ephrin B2	-1.15344	6.62676e-09	2.38478e-07
ENSMUSG00000042492	Tbc1d10b	68449	TBC1 domain family, member 10b	-1.15151	9.70235e-05	0.000775726
ENSMUSG00000034863	Ano8	382014	anoctamin 8	-1.14759	0.00179134	0.00870096
ENSMUSG00000036752	Tubb4b	227613	tubulin, beta 4B class IVB	-1.14477	1.20838e-15	2.16043e-13
ENSMUSG00000051346	Spryd4	66701	SPRY domain containing 4	-1.14433	0.000411429	0.00257171
ENSMUSG00000019850	Tnfaip3	21929	tumor necrosis factor, alpha-induced protein 3	-1.14343	0.000199451	0.00141315
ENSMUSG00000024713	Pcsk5	18552	proprotein convertase subtilisin/kexin type 5	-1.1432	0.0156861	0.0489764
ENSMUSG00000030137	Tuba8	53857	tubulin, alpha 8	-1.14103	4.88991e-05	0.000441876
ENSMUSG00000020086	Macroh2a2	404634	macroH2A.2 histone	-1.13934	1.16765e-06	1.93768e-05
ENSMUSG00000024037	Wdr4	57773	WD repeat domain 4	-1.13841	9.22049e-05	0.000742499
ENSMUSG00000061751	Kalrn	545156	kalirin, RhoGEF kinase	-1.13614	1.93692e-14	3.04224e-12
ENSMUSG00000038331	Satb2	212712	special AT-rich sequence binding protein 2	-1.1347	1.14946e-08	3.88572e-07
ENSMUSG00000032265	Tent5a	212943	terminal nucleotidyltransferase 5A	-1.1347	6.65096e-07	1.21893e-05
ENSMUSG00000091971	Hspa1a	193740	heat shock protein 1A	-1.13467	0.00284039	0.0125885
ENSMUSG00000014852	Adamts13	279028	a disintegrin-like and metallopeptidase (reprolysin type) with thrombospondin type 1 motif, 13	-1.13442	1.20964e-05	0.000140202
ENSMUSG00000046818	Ddit4l	73284	DNA-damage-inducible transcript 4-like	-1.13374	0.00552896	0.021352
ENSMUSG00000029595	Lhx5	16873	LIM homeobox protein 5	-1.13318	0.000760934	0.00427893
ENSMUSG00000001988	Npas1	18142	neuronal PAS domain protein 1	-1.13313	0.000139024	0.00104352
ENSMUSG00000036334	Igsf10	242050	immunoglobulin superfamily, member 10	-1.13077	0.00484739	0.0191901
ENSMUSG00000030157	Clec2d	93694	C-type lectin domain family 2, member d	-1.13037	0.003226	0.013923
ENSMUSG00000034173	Zbed5	71970	zinc finger, BED type containing 5	-1.12633	0.00106421	0.00565628
ENSMUSG00000004347	Pde1c	18575	phosphodiesterase 1C	-1.1244	1.12157e-05	0.000132089
ENSMUSG00000034361	Cpne2	234577	copine II	-1.12417	1.10179e-11	9.10614e-10
ENSMUSG00000017756	Slc12a7	20499	solute carrier family 12, member 7	-1.12204	6.77496e-05	0.000576506
ENSMUSG00000040795	Iqcc	230767	IQ motif containing C	-1.12042	0.0041075	0.0168614
ENSMUSG00000078439	Smim24	72273	small integral membrane protein 24	-1.11955	0.00155422	0.00773244
ENSMUSG00000069744	Psmb3	26446	proteasome (prosome, macropain) subunit, beta type 3	-1.11856	2.43863e-10	1.36612e-08
ENSMUSG00000096010	H4f16	320332	H4 histone 16	-1.11853	1.68028e-05	0.000184567
ENSMUSG00000029306	Ibsp	15891	integrin binding sialoprotein	-1.11364	0.00029774	0.00198171
ENSMUSG00000062510	Nsl1	381318	NSL1, MIS12 kinetochore complex component	-1.10955	0.00283068	0.0125554
ENSMUSG00000015289	Lage3	66192	L antigen family, member 3	-1.10899	8.17506e-08	2.0264e-06
ENSMUSG00000009633	G0s2	14373	G0/G1 switch gene 2	-1.10886	0.00443148	0.0179459
ENSMUSG00000024824	Rad9a	19367	RAD9 checkpoint clamp component A	-1.1084	0.000629895	0.0036706
ENSMUSG00000023911	Flywch2	76917	FLYWCH family member 2	-1.10796	0.00173551	0.00847385
ENSMUSG00000032796	Lama1	16772	laminin, alpha 1	-1.10637	0.000676302	0.00389111
ENSMUSG00000032295	Man2c1	73744	mannosidase, alpha, class 2C, member 1	-1.10574	0.00137448	0.00697451
ENSMUSG00000017713	Tha1	71776	threonine aldolase 1	-1.10503	0.00158398	0.00785724
ENSMUSG00000030649	Anapc15	75430	anaphase promoting complex C subunit 15	-1.10478	0.002761	0.0123113
ENSMUSG00000032314	Etfa	110842	electron transferring flavoprotein, alpha polypeptide	-1.10285	1.58234e-11	1.25438e-09
ENSMUSG00000006517	Mvd	192156	mevalonate (diphospho) decarboxylase	-1.10069	9.69585e-05	0.000775576
ENSMUSG00000045382	Cxcr4	12767	chemokine (C-X-C motif) receptor 4	-1.10018	0.00142547	0.00719843
ENSMUSG00000061762	Tac1	21333	tachykinin 1	-1.09873	1.08851e-05	0.000128804
ENSMUSG00000030905	Crym	12971	crystallin, mu	-1.09858	1.81133e-17	4.28749e-15
ENSMUSG00000031543	Ank1	11733	ankyrin 1, erythroid	-1.09834	3.1756e-07	6.60462e-06
ENSMUSG00000043496	Tril	66873	TLR4 interactor with leucine-rich repeats	-1.09808	0.0024273	0.0111123
ENSMUSG00000063524	Eno1	13806	enolase 1, alpha non-neuron	-1.09805	5.19583e-07	9.92285e-06
ENSMUSG00000030315	Vgll4	232334	vestigial like family member 4	-1.0979	9.04183e-05	0.00073197
ENSMUSG00000031349	Nsdhl	18194	NAD(P) dependent steroid dehydrogenase-like	-1.09589	4.13493e-07	8.24338e-06
ENSMUSG00000053469	Tg	21819	thyroglobulin	-1.09478	0.000239384	0.00165423
ENSMUSG00000034520	Gjc1	14615	gap junction protein, gamma 1	-1.09422	0.000268248	0.00181928
ENSMUSG00000063838	Cdc42ep5	58804	CDC42 effector protein (Rho GTPase binding) 5	-1.09394	0.00119415	0.0062442
ENSMUSG00000051444	Bbs12	241950	Bardet-Biedl syndrome 12 (human)	-1.09303	0.000456918	0.00279948
ENSMUSG00000020053	Igf1	16000	insulin-like growth factor 1	-1.09244	1.82432e-10	1.06457e-08
ENSMUSG00000061474	Mrps36	66128	mitochondrial ribosomal protein S36	-1.09128	1.60675e-05	0.000177769
ENSMUSG00000079580	Tmem217	71138	transmembrane protein 217	-1.0864	0.000273753	0.00184618
ENSMUSG00000044566	Cage1	71213	cancer antigen 1	-1.08555	0.00329493	0.0141804
ENSMUSG00000042831	Alkbh6	233065	alkB homolog 6	-1.08477	1.90015e-05	0.000203791
ENSMUSG00000044948	Cfap43	100048534	cilia and flagella associated protein 43	-1.0819	0.00841757	0.0298766
ENSMUSG00000015843	Rxrg	20183	retinoid X receptor gamma	-1.08157	0.00412972	0.0169361
ENSMUSG00000024878	Cbwd1	226043	COBW domain containing 1	-1.07914	1.7433e-05	0.000190122
ENSMUSG00000044433	Camsap3	69697	calmodulin regulated spectrin-associated protein family, member 3	-1.07819	0.000775029	0.00435041
ENSMUSG00000028631	Kcnq4	60613	potassium voltage-gated channel, subfamily Q, member 4	-1.07804	0.000788463	0.00441548
ENSMUSG00000074384	AI429214	621080	expressed sequence AI429214	-1.07723	0.00309194	0.0134515
ENSMUSG00000028680	Plk3	12795	polo like kinase 3	-1.07499	0.000746881	0.00421171
ENSMUSG00000044362	Ccdc89	70054	coiled-coil domain containing 89	-1.0749	0.00977695	0.0337049
ENSMUSG00000045160	Bola3	78653	bolA-like 3 (E. coli)	-1.07332	1.59393e-05	0.000176583
ENSMUSG00000090799	Klhl33	546611	kelch-like 33	-1.07245	0.00618232	0.0234484
ENSMUSG00000022125	Cln5	211286	ceroid-lipofuscinosis, neuronal 5	-1.07203	0.00135839	0.0069137
ENSMUSG00000027895	Kcnc4	99738	potassium voltage gated channel, Shaw-related subfamily, member 4	-1.07093	2.13565e-05	0.000224043
ENSMUSG00000047344	Lancl3	236285	LanC lantibiotic synthetase component C-like 3 (bacterial)	-1.07047	0.000481771	0.00293782
ENSMUSG00000026437	Cdk18	18557	cyclin-dependent kinase 18	-1.07016	1.727e-05	0.000188958
ENSMUSG00000029869	Ephb6	13848	Eph receptor B6	-1.07001	0.000889732	0.0048738
ENSMUSG00000024732	Ccdc86	108673	coiled-coil domain containing 86	-1.06931	0.0106462	0.03608
ENSMUSG00000033857	Engase	217364	endo-beta-N-acetylglucosaminidase	-1.06632	0.0087964	0.0309532
ENSMUSG00000042379	Esm1	71690	endothelial cell-specific molecule 1	-1.06607	1.08264e-07	2.59927e-06
ENSMUSG00000020142	Slc1a4	55963	solute carrier family 1 (glutamate/neutral amino acid transporter), member 4	-1.06485	0.000100772	0.000800743
ENSMUSG00000012123	Crybg2	230806	crystallin beta-gamma domain containing 2	-1.06431	0.000399241	0.00250734
ENSMUSG00000026688	Mgst3	66447	microsomal glutathione S-transferase 3	-1.0641	4.48676e-09	1.68314e-07
ENSMUSG00000038324	Trpc4ap	56407	transient receptor potential cation channel, subfamily C, member 4 associated protein	-1.06293	2.45589e-10	1.37122e-08
ENSMUSG00000039257	Vstm2b	58188	V-set and transmembrane domain containing 2B	-1.06285	2.71196e-09	1.09037e-07
ENSMUSG00000073805	Insyn2a	627214	inhibitory synaptic factor 2A	-1.06241	5.44268e-07	1.0243e-05
ENSMUSG00000019853	Hebp2	56016	heme binding protein 2	-1.05684	0.000328912	0.00214585
ENSMUSG00000000811	Txnrd3	232223	thioredoxin reductase 3	-1.05575	0.000438757	0.00270764
ENSMUSG00000048138	Dmrt2	226049	doublesex and mab-3 related transcription factor 2	-1.05418	0.00756478	0.0274231
ENSMUSG00000075334	Rprm	67874	reprimo, TP53 dependent G2 arrest mediator candidate	-1.05308	2.27477e-05	0.00023526
ENSMUSG00000040428	Plekha4	69217	pleckstrin homology domain containing, family A (phosphoinositide binding specific) member 4	-1.05266	0.00061776	0.00361367
ENSMUSG00000052033	Pfdn4	109054	prefoldin 4	-1.05254	1.65383e-11	1.30489e-09
ENSMUSG00000026475	Rgs16	19734	regulator of G-protein signaling 16	-1.05142	0.00293836	0.0129306
ENSMUSG00000016179	Camk1g	215303	calcium/calmodulin-dependent protein kinase I gamma	-1.05136	1.96898e-08	6.06056e-07
ENSMUSG00000020098	Pcbd1	13180	pterin 4 alpha carbinolamine dehydratase/dimerization cofactor of hepatocyte nuclear factor 1 alpha (TCF1) 1	-1.04968	0.00010612	0.000834167
ENSMUSG00000047789	Slc38a9	268706	solute carrier family 38, member 9	-1.0492	0.000104124	0.000821554
ENSMUSG00000014776	Nol3	78688	nucleolar protein 3 (apoptosis repressor with CARD domain)	-1.04877	0.00019832	0.0014075
ENSMUSG00000042918	Mamstr	74490	MEF2 activating motif and SAP domain containing transcriptional regulator	-1.04792	0.000297505	0.00198171
ENSMUSG00000049353	Rd3	74023	retinal degeneration 3	-1.04676	0.00115422	0.00607511
ENSMUSG00000060594	Layn	244864	layilin	-1.0465	7.48475e-05	0.000624882
ENSMUSG00000033669	Zfp7	223669	zinc finger protein 7	-1.04578	0.000140361	0.00105078
ENSMUSG00000007944	Ttc9b	73032	tetratricopeptide repeat domain 9B	-1.04525	0.000411633	0.00257171
ENSMUSG00000059013	Sh2d3c	27387	SH2 domain containing 3C	-1.04412	0.00453676	0.0182404
ENSMUSG00000042200	Cdrt4	66338	CMT1A duplicated region transcript 4	-1.04314	5.57062e-05	0.000490927
ENSMUSG00000024990	Rbp4	19662	retinol binding protein 4, plasma	-1.04206	0.00699836	0.0258266
ENSMUSG00000042641	Rgsl1	240816	regulator of G-protein signaling like 1	-1.04161	0.000780832	0.0043786
ENSMUSG00000021010	Npas3	27386	neuronal PAS domain protein 3	-1.04153	4.20223e-10	2.173e-08
ENSMUSG00000019689	Fmc1	66117	formation of mitochondrial complex V assembly factor 1	-1.04106	7.33967e-08	1.85211e-06
ENSMUSG00000021743	Fezf2	54713	Fez family zinc finger 2	-1.04062	4.86377e-08	1.31925e-06
ENSMUSG00000071531	Gprin2	432839	G protein regulated inducer of neurite outgrowth 2	-1.04062	4.31404e-05	0.000397924
ENSMUSG00000034755	Pcdh11x	245578	protocadherin 11 X-linked	-1.0403	0.00606358	0.0230814
ENSMUSG00000039795	Zfand1	66361	zinc finger, AN1-type domain 1	-1.03868	0.00214894	0.0100655
ENSMUSG00000033307	Mif	17319	macrophage migration inhibitory factor (glycosylation-inhibiting factor)	-1.03662	3.81311e-05	0.000359613
ENSMUSG00000062908	Acadm	11364	acyl-Coenzyme A dehydrogenase, medium chain	-1.03604	8.68376e-07	1.49989e-05
ENSMUSG00000005672	Kit	16590	KIT proto-oncogene receptor tyrosine kinase	-1.03564	2.18489e-07	4.78738e-06
ENSMUSG00000062151	Unc13c	208898	unc-13 homolog C	-1.03445	1.03208e-07	2.49212e-06
ENSMUSG00000037610	Kcnmb2	72413	potassium large conductance calcium-activated channel, subfamily M, beta member 2	-1.03238	3.15752e-09	1.23121e-07
ENSMUSG00000027954	Efna1	13636	ephrin A1	-1.03223	0.00448866	0.0181076
ENSMUSG00000044252	Osbpl1a	64291	oxysterol binding protein-like 1A	-1.03179	5.08549e-16	9.82377e-14
ENSMUSG00000024292	Cyp4f14	64385	cytochrome P450, family 4, subfamily f, polypeptide 14	-1.03074	1.13416e-05	0.000133198
ENSMUSG00000038416	Cdc16	69957	CDC16 cell division cycle 16	-1.03045	1.41965e-08	4.61481e-07
ENSMUSG00000046961	Gpr156	239845	G protein-coupled receptor 156	-1.02981	0.00487877	0.0192833
ENSMUSG00000067768	Xlr4b	27083	X-linked lymphocyte-regulated 4B	-1.0254	1.65317e-05	0.000182065
ENSMUSG00000039908	Slc26a11	268512	solute carrier family 26, member 11	-1.02419	0.00621507	0.0235459
ENSMUSG00000040482	Dxo	112403	decapping exoribonuclease	-1.02392	7.31749e-05	0.000613968
ENSMUSG00000050108	Bpifc	270757	BPI fold containing family C	-1.02203	1.29636e-07	3.04709e-06
ENSMUSG00000024177	Nme4	56520	NME/NM23 nucleoside diphosphate kinase 4	-1.02069	0.000301976	0.0020004
ENSMUSG00000007038	Neu1	18010	neuraminidase 1	-1.02001	0.00507719	0.0199223
ENSMUSG00000038233	Gask1a	245050	golgi associated kinase 1A	-1.0198	0.00573666	0.0220594
ENSMUSG00000036198	Arhgap36	75404	Rho GTPase activating protein 36	-1.01756	0.000160584	0.0011744
ENSMUSG00000035585	Tsen34	66078	tRNA splicing endonuclease subunit 34	-1.01508	1.89611e-08	5.87933e-07
ENSMUSG00000023064	Sncg	20618	synuclein, gamma	-1.01413	0.00181519	0.00879139
ENSMUSG00000076437	Selenoh	72657	selenoprotein H	-1.01352	1.41401e-06	2.28279e-05
ENSMUSG00000041153	Osgin2	209212	oxidative stress induced growth inhibitor family member 2	-1.01254	1.59843e-06	2.51293e-05
ENSMUSG00000024735	Prpf19	28000	pre-mRNA processing factor 19	-1.01228	3.81843e-11	2.71918e-09
ENSMUSG00000032459	Mrps22	64655	mitochondrial ribosomal protein S22	-1.01201	1.35663e-06	2.19861e-05
ENSMUSG00000041119	Pde9a	18585	phosphodiesterase 9A	-1.00843	3.5371e-05	0.000337923
ENSMUSG00000062309	Rpp25	102614	ribonuclease P/MRP 25 subunit	-1.00661	9.32874e-07	1.60142e-05
ENSMUSG00000074896	Ifit3	15959	interferon-induced protein with tetratricopeptide repeats 3	-1.0066	0.00805537	0.0288268
ENSMUSG00000024902	Mrpl11	66419	mitochondrial ribosomal protein L11	-1.00644	2.07409e-12	1.99183e-10
ENSMUSG00000032782	Cntrob	216846	centrobin, centrosomal BRCA2 interacting protein	-1.00565	0.0138786	0.0444952
ENSMUSG00000029101	Rgs12	71729	regulator of G-protein signaling 12	-1.00542	1.713e-10	1.01369e-08
ENSMUSG00000043059	Zfp513	101023	zinc finger protein 513	-1.00513	0.00645291	0.0242233
ENSMUSG00000041440	Gk5	235533	glycerol kinase 5 (putative)	-1.0051	0.00252154	0.0114533
ENSMUSG00000026213	Stk11ip	71728	serine/threonine kinase 11 interacting protein	-1.00421	0.000887643	0.00486395
ENSMUSG00000037343	Taf2	319944	TATA-box binding protein associated factor 2	-1.00327	3.59347e-05	0.000342941
ENSMUSG00000079339	Ifit1bl1	667373	interferon induced protein with tetratricpeptide repeats 1B like 1	-1.00286	0.0019091	0.00916171
ENSMUSG00000020153	Ndufs7	75406	NADH:ubiquinone oxidoreductase core subunit S7	-1.0026	0.00161181	0.00796476
ENSMUSG00000021940	Ptpn20	19256	protein tyrosine phosphatase, non-receptor type 20	-0.999122	0.0127752	0.0417542
ENSMUSG00000049148	Plcxd3	239318	phosphatidylinositol-specific phospholipase C, X domain containing 3	-0.998925	4.01094e-05	0.000374488
ENSMUSG00000027796	Smad9	55994	SMAD family member 9	-0.996138	0.00029858	0.00198573
ENSMUSG00000045968	Teddm2	240817	transmembrane epididymal family member 2	-0.996136	0.0125248	0.0410878
ENSMUSG00000033906	Zdhhc15	108672	zinc finger, DHHC domain containing 15	-0.993542	0.0026998	0.0120972
ENSMUSG00000039483	Asb6	72323	ankyrin repeat and SOCS box-containing 6	-0.99343	0.00548153	0.0212215
ENSMUSG00000042354	Gnl3	30877	guanine nucleotide binding protein-like 3 (nucleolar)	-0.99132	2.97385e-06	4.33184e-05
ENSMUSG00000002767	Mrpl2	27398	mitochondrial ribosomal protein L2	-0.990914	0.000185017	0.00132597
ENSMUSG00000026526	Fh1	14194	fumarate hydratase 1	-0.990569	1.75171e-08	5.51296e-07
ENSMUSG00000025925	Terf1	21749	telomeric repeat binding factor 1	-0.990309	1.10328e-07	2.64505e-06
ENSMUSG00000025577	Cbx2	12416	chromobox 2	-0.989425	0.00041234	0.00257468
ENSMUSG00000010047	Hyal2	15587	hyaluronoglucosaminidase 2	-0.989156	0.00844566	0.0299573
ENSMUSG00000024256	Adcyap1	11516	adenylate cyclase activating polypeptide 1	-0.98885	0.000621477	0.00363036
ENSMUSG00000020695	Mrc2	17534	mannose receptor, C type 2	-0.988452	0.00330691	0.0142174
ENSMUSG00000000253	Gmpr	66355	guanosine monophosphate reductase	-0.988162	2.54509e-05	0.000257668
ENSMUSG00000027936	Crtc2	74343	CREB regulated transcription coactivator 2	-0.987477	0.0145221	0.0461097
ENSMUSG00000040711	Sh3pxd2b	268396	SH3 and PX domains 2B	-0.986697	1.84356e-05	0.000198863
ENSMUSG00000025027	Xpnpep1	170750	X-prolyl aminopeptidase (aminopeptidase P) 1, soluble	-0.985786	1.49631e-06	2.38361e-05
ENSMUSG00000042293	Gm5617	434402	predicted gene 5617	-0.985132	0.00373272	0.0156206
ENSMUSG00000003421	Nosip	66394	nitric oxide synthase interacting protein	-0.984961	7.63566e-05	0.000635902
ENSMUSG00000055430	Nap1l5	58243	nucleosome assembly protein 1-like 5	-0.981996	6.86792e-10	3.29778e-08
ENSMUSG00000024528	Srfbp1	67222	serum response factor binding protein 1	-0.981635	0.000128028	0.000974916
ENSMUSG00000079083	Jrkl	77532	Jrk-like	-0.981576	6.33909e-07	1.17071e-05
ENSMUSG00000033970	Rfc3	69263	replication factor C (activator 1) 3	-0.98138	0.0112226	0.0376535
ENSMUSG00000027412	Lpin3	64899	lipin 3	-0.981222	2.16412e-08	6.56501e-07
ENSMUSG00000048281	Dleu7	239133	deleted in lymphocytic leukemia, 7	-0.978657	7.48408e-05	0.000624882
ENSMUSG00000038520	Tbc1d17	233204	TBC1 domain family, member 17	-0.978628	0.0034836	0.014773
ENSMUSG00000071679	Rtl4	619287	retrotransposon Gag like 4	-0.977722	0.000120458	0.000926501
ENSMUSG00000046862	Pramef8	242736	PRAME family member 8	-0.977405	6.58011e-06	8.38402e-05
ENSMUSG00000030048	Gkn3	68888	gastrokine 3	-0.977375	0.000371932	0.00237218
ENSMUSG00000018698	Lhx1	16869	LIM homeobox protein 1	-0.976383	0.00899482	0.0314538
ENSMUSG00000073412	Lst1	16988	leukocyte specific transcript 1	-0.973886	0.00244285	0.0111592
ENSMUSG00000027207	Galk2	69976	galactokinase 2	-0.97306	0.000338793	0.00220006
ENSMUSG00000048540	Nhlh2	18072	nescient helix loop helix 2	-0.97195	1.16796e-06	1.93768e-05
ENSMUSG00000053647	Gper1	76854	G protein-coupled estrogen receptor 1	-0.971429	0.00444083	0.0179708
ENSMUSG00000038797	Zscan2	22691	zinc finger and SCAN domain containing 2	-0.970409	0.0120569	0.0398326
ENSMUSG00000071379	Hpcal1	53602	hippocalcin-like 1	-0.970012	1.72972e-08	5.45398e-07
ENSMUSG00000036781	Rps27l	67941	ribosomal protein S27-like	-0.969218	7.59752e-06	9.45107e-05
ENSMUSG00000022307	Oxr1	170719	oxidation resistance 1	-0.96755	1.86309e-06	2.86009e-05
ENSMUSG00000056656	Apol8	239552	apolipoprotein L 8	-0.965159	0.000572448	0.00339111
ENSMUSG00000032172	Olfm2	244723	olfactomedin 2	-0.963589	2.47544e-07	5.34734e-06
ENSMUSG00000031379	Pir	69656	pirin	-0.963066	0.0103691	0.0352901
ENSMUSG00000036390	Gadd45a	13197	growth arrest and DNA-damage-inducible 45 alpha	-0.961972	0.000286314	0.0019204
ENSMUSG00000024846	Cst6	73720	cystatin E/M	-0.960649	0.000355313	0.0022899
ENSMUSG00000026799	Med27	68975	mediator complex subunit 27	-0.960504	4.37268e-05	0.00040289
ENSMUSG00000075602	Ly6a	110454	lymphocyte antigen 6 complex, locus A	-0.960495	0.00391669	0.0161943
ENSMUSG00000042834	Nrep	27528	neuronal regeneration related protein	-0.960476	1.89281e-14	3.001e-12
ENSMUSG00000000308	Ckmt1	12716	creatine kinase, mitochondrial 1, ubiquitous	-0.959951	2.78914e-07	5.91101e-06
ENSMUSG00000058173	Smco4	170748	single-pass membrane protein with coiled-coil domains 4	-0.959911	0.000600116	0.00352518
ENSMUSG00000036820	Amdhd2	245847	amidohydrolase domain containing 2	-0.959522	0.000736327	0.00416096
ENSMUSG00000028247	Coq3	230027	coenzyme Q3 methyltransferase	-0.959052	2.95601e-05	0.000290689
ENSMUSG00000031972	Acta1	11459	actin, alpha 1, skeletal muscle	-0.956453	0.0140726	0.044946
ENSMUSG00000047635	2810006K23Rik	72650	RIKEN cDNA 2810006K23 gene	-0.955237	8.9153e-06	0.000108181
ENSMUSG00000049482	Ctu2	66965	cytosolic thiouridylase subunit 2	-0.954719	0.00547087	0.0211949
ENSMUSG00000024926	Kat5	81601	K(lysine) acetyltransferase 5	-0.952049	2.60301e-05	0.000262112
ENSMUSG00000003809	Gcdh	270076	glutaryl-Coenzyme A dehydrogenase	-0.951693	2.84818e-06	4.16231e-05
ENSMUSG00000021228	Acot3	171281	acyl-CoA thioesterase 3	-0.951101	0.00712081	0.0261227
ENSMUSG00000029254	Stap1	56792	signal transducing adaptor family member 1	-0.950995	0.000875289	0.00481037
ENSMUSG00000028670	Lypla2	26394	lysophospholipase 2	-0.950684	3.5477e-06	5.02297e-05
ENSMUSG00000018697	Aatf	56321	apoptosis antagonizing transcription factor	-0.950508	1.74261e-05	0.000190122
ENSMUSG00000068744	Psrc1	56742	proline/serine-rich coiled-coil 1	-0.950374	0.00776792	0.0280085
ENSMUSG00000029433	Diablo	66593	diablo, IAP-binding mitochondrial protein	-0.949859	1.80686e-05	0.000195784
ENSMUSG00000070284	Gmppb	331026	GDP-mannose pyrophosphorylase B	-0.949547	4.39369e-05	0.000404605
ENSMUSG00000001285	Myg1	60315	melanocyte proliferating gene 1	-0.947352	1.96355e-05	0.00020952
ENSMUSG00000033294	Noc4l	100608	NOC4 like	-0.947049	3.70293e-05	0.000350599
ENSMUSG00000022856	Tmem41a	66664	transmembrane protein 41a	-0.946831	2.7081e-05	0.000270585
ENSMUSG00000032527	Pccb	66904	propionyl Coenzyme A carboxylase, beta polypeptide	-0.946106	1.25912e-09	5.62788e-08
ENSMUSG00000020562	Efcab10	75040	EF-hand calcium binding domain 10	-0.945891	0.00361588	0.015215
ENSMUSG00000024829	Mrpl21	353242	mitochondrial ribosomal protein L21	-0.942602	2.89511e-16	5.79228e-14
ENSMUSG00000105652	4930519L02Rik	102636203	RIKEN cDNA 4930519L02 gene	-0.942486	9.11863e-05	0.000737122
ENSMUSG00000028964	Park7	57320	Parkinson disease (autosomal recessive, early onset) 7	-0.942212	3.15152e-10	1.67609e-08
ENSMUSG00000055560	Zfp459	328274	zinc finger protein 459	-0.941908	0.00948726	0.032868
ENSMUSG00000060600	Eno3	13808	enolase 3, beta muscle	-0.941892	0.00339819	0.0145059
ENSMUSG00000021774	Ube2e1	22194	ubiquitin-conjugating enzyme E2E 1	-0.941786	3.44237e-09	1.33609e-07
ENSMUSG00000038502	Ptov1	84113	prostate tumor over expressed gene 1	-0.940079	0.000575189	0.00340494
ENSMUSG00000059897	Zfp930	234358	zinc finger protein 930	-0.939879	0.000817043	0.00455279
ENSMUSG00000029060	Mib2	76580	mindbomb E3 ubiquitin protein ligase 2	-0.939856	0.00627498	0.0237098
ENSMUSG00000030446	Zfp273	212569	zinc finger protein 273	-0.939274	0.0107091	0.0362488
ENSMUSG00000068762	Gstm6	14867	glutathione S-transferase, mu 6	-0.939178	0.000325323	0.00212738
ENSMUSG00000038718	Pbx3	18516	pre B cell leukemia homeobox 3	-0.939075	2.57912e-06	3.82228e-05
ENSMUSG00000030689	Ino80e	233875	INO80 complex subunit E	-0.939031	0.000376167	0.00239052
ENSMUSG00000030725	Lipt2	67164	lipoyl(octanoyl) transferase 2 (putative)	-0.938002	0.00135087	0.00688378
ENSMUSG00000033478	Fam160b1	226252	family with sequence similarity 160, member B1	-0.937585	9.12336e-08	2.24491e-06
ENSMUSG00000032342	Mto1	68291	mitochondrial tRNA translation optimization 1	-0.937405	6.47422e-06	8.29162e-05
ENSMUSG00000041782	Lad1	16763	ladinin	-0.937079	8.11085e-05	0.000665954
ENSMUSG00000029551	Psmg3	66506	proteasome (prosome, macropain) assembly chaperone 3	-0.937067	0.000479621	0.00292684
ENSMUSG00000028896	Rcc1	100088	regulator of chromosome condensation 1	-0.936576	7.09861e-05	0.000599999
ENSMUSG00000040749	Siah1b	20438	siah E3 ubiquitin protein ligase 1B	-0.936447	0.00203907	0.00965585
ENSMUSG00000074622	Mafb	16658	v-maf musculoaponeurotic fibrosarcoma oncogene family, protein B (avian)	-0.93586	3.05167e-05	0.000298524
ENSMUSG00000060098	Prmt7	214572	protein arginine N-methyltransferase 7	-0.935363	6.26477e-06	8.07405e-05
ENSMUSG00000028832	Stmn1	16765	stathmin 1	-0.934774	2.73443e-20	1.12085e-17
ENSMUSG00000045193	Cirbp	12696	cold inducible RNA binding protein	-0.934224	3.44647e-07	7.09821e-06
ENSMUSG00000004791	Pgf	18654	placental growth factor	-0.933674	0.0068362	0.0253786
ENSMUSG00000025538	Sumf2	67902	sulfatase modifying factor 2	-0.933473	0.00708975	0.0260495
ENSMUSG00000103677	Pcdhga4	93712	protocadherin gamma subfamily A, 4	-0.931741	0.000536472	0.0032051
ENSMUSG00000023015	Racgap1	26934	Rac GTPase-activating protein 1	-0.931074	0.0160325	0.0497769
ENSMUSG00000064128	Cenpj	219103	centromere protein J	-0.93027	0.00413136	0.0169387
ENSMUSG00000041716	Gm20604	100859931	predicted gene 20604	-0.929163	1.44253e-06	2.31771e-05
ENSMUSG00000020919	Stat5b	20851	signal transducer and activator of transcription 5B	-0.928203	7.52497e-05	0.000627616
ENSMUSG00000010936	Vac14	234729	Vac14 homolog (S. cerevisiae)	-0.926937	4.65848e-06	6.29344e-05
ENSMUSG00000037653	Kctd8	243043	potassium channel tetramerisation domain containing 8	-0.924578	1.1044e-08	3.74962e-07
ENSMUSG00000005699	Pard6a	56513	par-6 family cell polarity regulator alpha	-0.9241	0.000245373	0.00169075
ENSMUSG00000032299	Commd4	66199	COMM domain containing 4	-0.923269	2.47363e-06	3.67892e-05
ENSMUSG00000020363	Gfpt2	14584	glutamine fructose-6-phosphate transaminase 2	-0.922043	0.013309	0.0431131
ENSMUSG00000060240	Cend1	57754	cell cycle exit and neuronal differentiation 1	-0.921211	4.07047e-05	0.000379414
ENSMUSG00000038026	Kcnj9	16524	potassium inwardly-rectifying channel, subfamily J, member 9	-0.921059	4.19362e-07	8.3209e-06
ENSMUSG00000030670	Cyp2r1	244209	cytochrome P450, family 2, subfamily r, polypeptide 1	-0.919639	5.23987e-05	0.000467058
ENSMUSG00000026241	Nppc	18159	natriuretic peptide type C	-0.918583	0.00195323	0.00933352
ENSMUSG00000027533	Fabp5	16592	fatty acid binding protein 5, epidermal	-0.918307	5.45028e-11	3.69345e-09
ENSMUSG00000063146	Clip2	269713	CAP-GLY domain containing linker protein 2	-0.917531	0.000176834	0.00127603
ENSMUSG00000049122	Frmd3	242506	FERM domain containing 3	-0.91742	0.00871662	0.0307278
ENSMUSG00000051590	Map3k19	22625	mitogen-activated protein kinase kinase kinase 19	-0.917149	0.00536115	0.0208563
ENSMUSG00000029361	Nos1	18125	nitric oxide synthase 1, neuronal	-0.917048	1.33267e-11	1.07677e-09
ENSMUSG00000028637	Ccdc30	73332	coiled-coil domain containing 30	-0.914483	0.00642694	0.0241636
ENSMUSG00000003134	Tbc1d8	54610	TBC1 domain family, member 8	-0.914268	0.00021293	0.00149791
ENSMUSG00000031171	Ftsj1	54632	FtsJ RNA methyltransferase homolog 1 (E. coli)	-0.914229	9.3463e-05	0.000751191
ENSMUSG00000027577	Chrna4	11438	cholinergic receptor, nicotinic, alpha polypeptide 4	-0.913563	0.000226059	0.00157576
ENSMUSG00000034282	Evpl	14027	envoplakin	-0.913417	0.0027649	0.0123254
ENSMUSG00000026104	Stat1	20846	signal transducer and activator of transcription 1	-0.913163	0.00492334	0.0194366
ENSMUSG00000002379	Ndufa11	69875	NADH:ubiquinone oxidoreductase subunit A11	-0.912786	0.000316904	0.00208368
ENSMUSG00000004788	Eif2b2	217715	eukaryotic translation initiation factor 2B, subunit 2 beta	-0.911746	7.11837e-07	1.2836e-05
ENSMUSG00000046658	Zfp316	54201	zinc finger protein 316	-0.911522	0.000871761	0.00479412
ENSMUSG00000050447	Lypd6	320343	LY6/PLAUR domain containing 6	-0.911116	3.067e-08	8.90224e-07
ENSMUSG00000018659	Pnpo	103711	pyridoxine 5'-phosphate oxidase	-0.910228	3.04328e-09	1.1922e-07
ENSMUSG00000001039	B9d1	27078	B9 protein domain 1	-0.910014	0.000107063	0.000838445
ENSMUSG00000030674	Qprt	67375	quinolinate phosphoribosyltransferase	-0.909914	4.4304e-05	0.000407093
ENSMUSG00000006930	Hap1	15114	huntingtin-associated protein 1	-0.909802	1.96353e-09	8.27047e-08
ENSMUSG00000051950	B3glct	381694	beta-3-glucosyltransferase	-0.90939	0.000686483	0.00393487
ENSMUSG00000021569	Trip13	69716	thyroid hormone receptor interactor 13	-0.909119	0.000286357	0.0019204
ENSMUSG00000032890	Rims3	242662	regulating synaptic membrane exocytosis 3	-0.908389	1.34185e-06	2.17886e-05
ENSMUSG00000063281	Zfp35	22694	zinc finger protein 35	-0.90817	3.45526e-07	7.10662e-06
ENSMUSG00000003411	Rab3b	69908	RAB3B, member RAS oncogene family	-0.906894	1.30064e-08	4.28214e-07
ENSMUSG00000019979	Apaf1	11783	apoptotic peptidase activating factor 1	-0.905879	7.84233e-06	9.73399e-05
ENSMUSG00000021273	Fdft1	14137	farnesyl diphosphate farnesyl transferase 1	-0.904509	3.45896e-08	9.81946e-07
ENSMUSG00000066705	Fxyd6	59095	FXYD domain-containing ion transport regulator 6	-0.904469	1.24303e-08	4.13671e-07
ENSMUSG00000059534	Uqcr10	66152	ubiquinol-cytochrome c reductase, complex III subunit X	-0.903772	8.44662e-07	1.47319e-05
ENSMUSG00000039661	Dusp26	66959	dual specificity phosphatase 26 (putative)	-0.903713	2.38481e-10	1.34494e-08
ENSMUSG00000061298	Agbl4	78933	ATP/GTP binding protein-like 4	-0.903063	0.00315519	0.0136646
ENSMUSG00000025175	Fn3k	63828	fructosamine 3 kinase	-0.899665	2.76774e-06	4.06596e-05
ENSMUSG00000028174	Rpe65	19892	retinal pigment epithelium 65	-0.899213	5.06379e-05	0.000454904
ENSMUSG00000063897	Dhrsx	236082	dehydrogenase/reductase (SDR family) X chromosome	-0.897241	0.0027994	0.0124495
ENSMUSG00000029788	Cpa5	74649	carboxypeptidase A5	-0.895175	0.000885277	0.00485415
ENSMUSG00000069171	Nr2f1	13865	nuclear receptor subfamily 2, group F, member 1	-0.893838	3.19587e-07	6.63083e-06
ENSMUSG00000054453	Sytl5	236643	synaptotagmin-like 5	-0.893663	0.00405304	0.0166541
ENSMUSG00000009555	Cdk9	107951	cyclin-dependent kinase 9 (CDC2-related kinase)	-0.892343	0.000107625	0.000841668
ENSMUSG00000029059	Prxl2b	66469	peroxiredoxin like 2B	-0.890431	1.41524e-07	3.27159e-06
ENSMUSG00000068479	Mfap1a	67532	microfibrillar-associated protein 1A	-0.888654	3.84735e-05	0.000361827
ENSMUSG00000034022	Cpsf1	94230	cleavage and polyadenylation specific factor 1	-0.888396	0.000263108	0.00179092
ENSMUSG00000038400	Pmepa1	65112	prostate transmembrane protein, androgen induced 1	-0.887792	0.000140366	0.00105078
ENSMUSG00000019179	Mdh2	17448	malate dehydrogenase 2, NAD (mitochondrial)	-0.88687	1.61323e-13	2.1017e-11
ENSMUSG00000022235	Cmbl	69574	carboxymethylenebutenolidase-like (Pseudomonas)	-0.886673	0.000376345	0.00239052
ENSMUSG00000039057	Myo16	244281	myosin XVI	-0.88632	1.57755e-06	2.48475e-05
ENSMUSG00000029581	Fscn1	14086	fascin actin-bundling protein 1	-0.885449	7.18265e-06	9.00162e-05
ENSMUSG00000087141	Plcxd2	433022	phosphatidylinositol-specific phospholipase C, X domain containing 2	-0.885396	2.32406e-08	6.98715e-07
ENSMUSG00000038028	Tigar	319801	Trp53 induced glycolysis regulatory phosphatase	-0.884916	0.000590187	0.00347415
ENSMUSG00000020810	Cygb	114886	cytoglobin	-0.88437	1.10993e-06	1.85237e-05
ENSMUSG00000028706	Nsun4	72181	NOL1/NOP2/Sun domain family, member 4	-0.882395	0.0156449	0.0488805
ENSMUSG00000024486	Hbegf	15200	heparin-binding EGF-like growth factor	-0.882114	0.00424902	0.0173239
ENSMUSG00000074576	Mocs3	69372	molybdenum cofactor synthesis 3	-0.882109	0.0061357	0.0233085
ENSMUSG00000022935	Grik1	14805	glutamate receptor, ionotropic, kainate 1	-0.882026	0.000381501	0.00241215
ENSMUSG00000025737	Wdr24	268933	WD repeat domain 24	-0.879979	0.00203998	0.00965651
ENSMUSG00000075707	Dio3	107585	deiodinase, iodothyronine type III	-0.879788	0.000260239	0.00177715
ENSMUSG00000018339	Gpx3	14778	glutathione peroxidase 3	-0.879489	0.000101129	0.000802065
ENSMUSG00000034891	Sncb	104069	synuclein, beta	-0.878927	7.10176e-06	8.91986e-05
ENSMUSG00000049154	Fam183b	75429	family with sequence similarity 183, member B	-0.878676	0.00484833	0.0191901
ENSMUSG00000030515	Tarsl2	272396	threonyl-tRNA synthetase-like 2	-0.87751	2.95863e-05	0.000290776
ENSMUSG00000029440	Psmd9	67151	proteasome (prosome, macropain) 26S subunit, non-ATPase, 9	-0.877457	1.13013e-07	2.69405e-06
ENSMUSG00000019923	Zwint	52696	ZW10 interactor	-0.877415	6.76849e-13	7.72366e-11
ENSMUSG00000037408	Cnnm4	94220	cyclin M4	-0.876385	0.00653296	0.024472
ENSMUSG00000056758	Hmga2	15364	high mobility group AT-hook 2	-0.875941	0.00895514	0.0313672
ENSMUSG00000006958	Chrd	12667	chordin	-0.875643	0.0142492	0.0454147
ENSMUSG00000063296	Tmem117	320709	transmembrane protein 117	-0.874513	0.00872854	0.0307594
ENSMUSG00000033726	Emx1	13796	empty spiracles homeobox 1	-0.874087	0.008076	0.0288839
ENSMUSG00000056394	Lig1	16881	ligase I, DNA, ATP-dependent	-0.873537	0.00252674	0.0114707
ENSMUSG00000027082	Tfpi	21788	tissue factor pathway inhibitor	-0.872849	0.00524127	0.0204658
ENSMUSG00000043639	Rbm20	73713	RNA binding motif protein 20	-0.872798	0.00391801	0.0161943
ENSMUSG00000028222	Calb1	12307	calbindin 1	-0.872754	9.92369e-09	3.41058e-07
ENSMUSG00000024182	Axin1	12005	axin 1	-0.872373	2.43412e-05	0.000247443
ENSMUSG00000039230	Tbcd	108903	tubulin-specific chaperone d	-0.872065	0.000861933	0.00475095
ENSMUSG00000027849	Syt6	54524	synaptotagmin VI	-0.871309	2.42364e-08	7.21079e-07
ENSMUSG00000021217	Tshz3	243931	teashirt zinc finger family member 3	-0.871169	5.82259e-08	1.52659e-06
ENSMUSG00000037916	Ndufv1	17995	NADH:ubiquinone oxidoreductase core subunit V1	-0.870446	2.73521e-08	8.06455e-07
ENSMUSG00000010025	Aldh3a2	11671	aldehyde dehydrogenase family 3, subfamily A2	-0.868487	6.51616e-08	1.67447e-06
ENSMUSG00000011752	Pgam1	18648	phosphoglycerate mutase 1	-0.868358	2.58599e-09	1.04723e-07
ENSMUSG00000028443	Nudt2	66401	nudix (nucleoside diphosphate linked moiety X)-type motif 2	-0.868238	0.00151218	0.0075546
ENSMUSG00000030086	Chchd6	66098	coiled-coil-helix-coiled-coil-helix domain containing 6	-0.867509	6.27961e-06	8.08698e-05
ENSMUSG00000019774	Mtrf1l	108853	mitochondrial translational release factor 1-like	-0.867409	0.00208995	0.00984133
ENSMUSG00000025475	Adgra1	52389	adhesion G protein-coupled receptor A1	-0.867409	6.22581e-08	1.60724e-06
ENSMUSG00000046999	1110032F04Rik	68725	RIKEN cDNA 1110032F04 gene	-0.867249	0.00625617	0.0236591
ENSMUSG00000040269	Mrps28	66230	mitochondrial ribosomal protein S28	-0.86669	1.72426e-05	0.000188782
ENSMUSG00000002058	Unc119	22248	unc-119 lipid binding chaperone	-0.866661	1.78487e-05	0.000193776
ENSMUSG00000063439	B9d2	232987	B9 protein domain 2	-0.866523	0.00739494	0.0269178
ENSMUSG00000025137	Pcyt2	68671	phosphate cytidylyltransferase 2, ethanolamine	-0.866383	0.000330045	0.00215231
ENSMUSG00000062794	Zfp599	235048	zinc finger protein 599	-0.866129	0.0116932	0.0388908
ENSMUSG00000001999	Blvra	109778	biliverdin reductase A	-0.865029	0.00341484	0.0145658
ENSMUSG00000035198	Tubg1	103733	tubulin, gamma 1	-0.863246	3.14093e-06	4.55449e-05
ENSMUSG00000049265	Kcnk3	16527	potassium channel, subfamily K, member 3	-0.862087	0.0101208	0.0345852
ENSMUSG00000003072	Atp5d	66043	ATP synthase, H+ transporting, mitochondrial F1 complex, delta subunit	-0.860742	0.000186715	0.00133625
ENSMUSG00000064125	Prr36	73072	proline rich 36	-0.86045	0.000273272	0.00184507
ENSMUSG00000068264	Ap5s1	69596	adaptor-related protein 5 complex, sigma 1 subunit	-0.860312	0.000584803	0.00344849
ENSMUSG00000029466	Anapc7	56317	anaphase promoting complex subunit 7	-0.858668	0.000110887	0.000863962
ENSMUSG00000030751	Psma1	26440	proteasome subunit alpha 1	-0.858623	4.88262e-08	1.31925e-06
ENSMUSG00000039910	Cited2	17684	Cbp/p300-interacting transactivator, with Glu/Asp-rich carboxy-terminal domain, 2	-0.857876	1.58713e-07	3.60449e-06
ENSMUSG00000036748	Cuedc2	67116	CUE domain containing 2	-0.85759	0.000250154	0.00171805
ENSMUSG00000070705	Eid2b	434156	EP300 interacting inhibitor of differentiation 2B	-0.857287	1.06184e-05	0.000126293
ENSMUSG00000046207	Pik3r6	104709	phosphoinositide-3-kinase regulatory subunit 5	-0.856948	0.00150803	0.00753834
ENSMUSG00000030695	Aldoa	11674	aldolase A, fructose-bisphosphate	-0.856152	1.72836e-11	1.33856e-09
ENSMUSG00000034324	Tmem132c	208213	transmembrane protein 132C	-0.854718	0.0133492	0.0431767
ENSMUSG00000078768	Zfp566	72556	zinc finger protein 566	-0.854373	0.00522932	0.0204334
ENSMUSG00000054428	Atpif1	11983	ATPase inhibitory factor 1	-0.85371	2.13884e-12	2.04235e-10
ENSMUSG00000027581	Stmn3	20262	stathmin-like 3	-0.852857	9.76419e-11	6.14596e-09
ENSMUSG00000027395	Polr1b	20017	polymerase (RNA) I polypeptide B	-0.852473	0.0103324	0.0351771
ENSMUSG00000003033	Ap1m1	11767	adaptor-related protein complex AP-1, mu subunit 1	-0.852259	6.09476e-06	7.88134e-05
ENSMUSG00000032578	Cish	12700	cytokine inducible SH2-containing protein	-0.851289	0.00977248	0.0336964
ENSMUSG00000046593	Tmem215	320500	transmembrane protein 215	-0.850771	0.00343369	0.0146056
ENSMUSG00000085139	A730046J19Rik	319764	RIKEN cDNA A730046J19 gene	-0.850522	0.0133867	0.0432732
ENSMUSG00000091931	Gon7	100233175	GON7 subunit of KEOPS complex	-0.849759	0.000362089	0.00232262
ENSMUSG00000028937	Acot7	70025	acyl-CoA thioesterase 7	-0.849626	3.93979e-08	1.09905e-06
ENSMUSG00000023873	1700010I14Rik	66931	RIKEN cDNA 1700010I14 gene	-0.849038	0.00251275	0.0114233
ENSMUSG00000019210	Atp6v1e1	11973	ATPase, H+ transporting, lysosomal V1 subunit E1	-0.846887	1.41341e-12	1.45729e-10
ENSMUSG00000029752	Asns	27053	asparagine synthetase	-0.846627	8.5107e-08	2.1034e-06
ENSMUSG00000031840	Rab3a	19339	RAB3A, member RAS oncogene family	-0.846551	1.84146e-10	1.07085e-08
ENSMUSG00000027613	Eif6	16418	eukaryotic translation initiation factor 6	-0.846277	4.23391e-05	0.000392256
ENSMUSG00000027360	Hdc	15186	histidine decarboxylase	-0.846247	0.00684847	0.0253961
ENSMUSG00000047730	Fcgbp	215384	Fc fragment of IgG binding protein	-0.845918	0.00792784	0.0284691
ENSMUSG00000031343	Gabra3	14396	gamma-aminobutyric acid (GABA) A receptor, subunit alpha 3	-0.84565	7.68887e-07	1.36595e-05
ENSMUSG00000021024	Psma6	26443	proteasome subunit alpha 6	-0.843761	9.47197e-10	4.37324e-08
ENSMUSG00000005583	Mef2c	17260	myocyte enhancer factor 2C	-0.8434	2.74841e-09	1.09976e-07
ENSMUSG00000033751	Gadd45gip1	102060	growth arrest and DNA-damage-inducible, gamma interacting protein 1	-0.843057	0.00308499	0.013433
ENSMUSG00000015971	Actr8	56249	ARP8 actin-related protein 8	-0.842873	6.73408e-07	1.2288e-05
ENSMUSG00000040112	Mrps35	232536	mitochondrial ribosomal protein S35	-0.842621	0.000168164	0.00122398
ENSMUSG00000013997	Nit1	27045	nitrilase 1	-0.842254	0.000224078	0.00156389
ENSMUSG00000020747	Tmem94	71947	transmembrane protein 94	-0.840891	0.00796649	0.0285712
ENSMUSG00000058503	Fam133b	68152	family with sequence similarity 133, member B	-0.839991	1.29629e-05	0.0001482
ENSMUSG00000017188	Coa3	52469	cytochrome C oxidase assembly factor 3	-0.839492	6.35631e-06	8.16855e-05
ENSMUSG00000002319	Ipo4	75751	importin 4	-0.839303	0.00130841	0.00671835
ENSMUSG00000037190	Cyb561d2	56368	cytochrome b-561 domain containing 2	-0.838934	0.00547658	0.0212073
ENSMUSG00000002660	Clpp	53895	caseinolytic mitochondrial matrix peptidase proteolytic subunit	-0.83756	5.58935e-05	0.000492062
ENSMUSG00000051483	Cbr1	12408	carbonyl reductase 1	-0.83749	1.10498e-07	2.64535e-06
ENSMUSG00000040102	Klhl42	232539	kelch-like 42	-0.835475	0.00107351	0.00570029
ENSMUSG00000031585	Gtf2e2	68153	general transcription factor II E, polypeptide 2 (beta subunit)	-0.835452	1.2814e-07	3.02347e-06
ENSMUSG00000051920	Rspo2	239405	R-spondin 2	-0.835016	0.00155082	0.00771783
ENSMUSG00000035365	Parpbp	75317	PARP1 binding protein	-0.834853	0.000840179	0.00465701
ENSMUSG00000025172	Ankrd2	56642	ankyrin repeat domain 2 (stretch responsive muscle)	-0.834421	6.26424e-05	0.000539328
ENSMUSG00000029875	Ccdc184	239650	coiled-coil domain containing 184	-0.834212	0.000319522	0.00209679
ENSMUSG00000057469	E2f6	50496	E2F transcription factor 6	-0.834091	1.15143e-08	3.88572e-07
ENSMUSG00000037492	Zmat4	320158	zinc finger, matrin type 4	-0.833323	7.21838e-09	2.57017e-07
ENSMUSG00000021460	Auh	11992	AU RNA binding protein/enoyl-coenzyme A hydratase	-0.83289	1.0706e-10	6.71359e-09
ENSMUSG00000049687	Pheta2	338368	PH domain containing endocytic trafficking adaptor 2	-0.832588	0.000221152	0.00154797
ENSMUSG00000028480	Glipr2	384009	GLI pathogenesis-related 2	-0.832484	0.00376185	0.0157219
ENSMUSG00000047497	Adamts12	239337	a disintegrin-like and metallopeptidase (reprolysin type) with thrombospondin type 1 motif, 12	-0.832455	0.00463919	0.0185444
ENSMUSG00000019470	Xab2	67439	XPA binding protein 2	-0.83184	0.00142421	0.00719796
ENSMUSG00000025204	Ndufb8	67264	NADH:ubiquinone oxidoreductase subunit B8	-0.831805	5.46785e-08	1.44713e-06
ENSMUSG00000034880	Mrpl34	94065	mitochondrial ribosomal protein L34	-0.831804	0.000463698	0.00283895
ENSMUSG00000029171	Pgm2	66681	phosphoglucomutase 2	-0.831538	0.0132889	0.0430645
ENSMUSG00000026399	Cd55	13136	CD55 molecule, decay accelerating factor for complement	-0.831244	0.0157763	0.0491723
ENSMUSG00000018286	Psmb6	19175	proteasome (prosome, macropain) subunit, beta type 6	-0.831052	2.25374e-10	1.28831e-08
ENSMUSG00000034218	Atm	11920	ataxia telangiectasia mutated	-0.830919	0.00043263	0.00268394
ENSMUSG00000044365	Cxxc4	319478	CXXC finger 4	-0.830679	5.02844e-10	2.51512e-08
ENSMUSG00000030270	Cpne9	211232	copine family member IX	-0.829671	4.46778e-06	6.09461e-05
ENSMUSG00000033423	Eri3	140546	exoribonuclease 3	-0.82939	7.09029e-05	0.000599997
ENSMUSG00000020000	Moxd1	59012	monooxygenase, DBH-like 1	-0.828392	0.0030426	0.0132815
ENSMUSG00000032417	Rwdd2a	69519	RWD domain containing 2A	-0.828295	0.000167659	0.00122083
ENSMUSG00000027574	Nkain4	58237	Na+/K+ transporting ATPase interacting 4	-0.828088	0.00348567	0.014778
ENSMUSG00000021606	Ndufs6	407785	NADH:ubiquinone oxidoreductase core subunit S6	-0.827777	2.54834e-09	1.03448e-07
ENSMUSG00000028199	Cryz	12972	crystallin, zeta	-0.827568	0.00294611	0.012959
ENSMUSG00000031813	Mvb12a	73711	multivesicular body subunit 12A	-0.826589	0.000917083	0.00499886
ENSMUSG00000047044	D030056L22Rik	225995	RIKEN cDNA D030056L22 gene	-0.826297	1.31121e-07	3.0691e-06
ENSMUSG00000023966	Rsph9	75564	radial spoke head 9 homolog (Chlamydomonas)	-0.826165	0.000830703	0.00461361
ENSMUSG00000037204	Atg101	68118	autophagy related 101	-0.825055	0.00209071	0.00984214
ENSMUSG00000027163	Commd9	76501	COMM domain containing 9	-0.825008	0.00711915	0.0261227
ENSMUSG00000045625	Pigz	239827	phosphatidylinositol glycan anchor biosynthesis, class Z	-0.824165	0.007109	0.0260976
ENSMUSG00000005378	Bud23	66138	BUD23, rRNA methyltransferase and ribosome maturation factor	-0.823957	5.98724e-05	0.000520546
ENSMUSG00000003623	Crot	74114	carnitine O-octanoyltransferase	-0.823006	7.30245e-05	0.000613012
ENSMUSG00000043289	Mei4	75033	meiotic double-stranded break formation protein 4	-0.822591	0.0118447	0.039317
ENSMUSG00000003872	Lin7b	22342	lin-7 homolog B (C. elegans)	-0.822473	0.0159268	0.049522
ENSMUSG00000020230	Prmt2	15468	protein arginine N-methyltransferase 2	-0.822165	0.00134346	0.00685432
ENSMUSG00000048175	Asb8	78541	ankyrin repeat and SOCS box-containing 8	-0.821833	3.94341e-08	1.09905e-06
ENSMUSG00000005947	Itgae	16407	integrin alpha E, epithelial-associated	-0.821054	0.00131382	0.00673884
ENSMUSG00000005986	Ankrd13d	68423	ankyrin repeat domain 13 family, member D	-0.820609	0.00198997	0.00947674
ENSMUSG00000021643	Serf1	20365	small EDRK-rich factor 1	-0.820551	4.86869e-07	9.39417e-06
ENSMUSG00000021764	Ndufs4	17993	NADH:ubiquinone oxidoreductase core subunit S4	-0.820296	6.83451e-09	2.44385e-07
ENSMUSG00000035842	Ddx11	320209	DEAD/H box helicase 11	-0.818374	0.000514272	0.00309591
ENSMUSG00000009863	Sdhb	67680	succinate dehydrogenase complex, subunit B, iron sulfur (Ip)	-0.818301	2.25422e-11	1.71423e-09
ENSMUSG00000054978	Kbtbd13	74492	kelch repeat and BTB (POZ) domain containing 13	-0.818142	2.41828e-05	0.000246408
ENSMUSG00000042726	Trafd1	231712	TRAF type zinc finger domain containing 1	-0.817705	2.95815e-06	4.3155e-05
ENSMUSG00000024050	Wiz	22404	widely-interspaced zinc finger motifs	-0.817103	0.000160388	0.00117399
ENSMUSG00000049536	Tceal1	237052	transcription elongation factor A (SII)-like 1	-0.817091	3.10942e-08	9.0098e-07
ENSMUSG00000078970	Wdr92	103784	WD repeat domain 92	-0.817032	0.0033565	0.0143791
ENSMUSG00000063802	Hspbp1	66245	HSPA (heat shock 70kDa) binding protein, cytoplasmic cochaperone 1	-0.81661	0.00116438	0.00611913
ENSMUSG00000040466	Blvrb	233016	biliverdin reductase B (flavin reductase (NADPH))	-0.815805	0.00117368	0.00615524
ENSMUSG00000041556	Fbxo2	230904	F-box protein 2	-0.815166	0.00143284	0.00722699
ENSMUSG00000043719	Col6a6	245026	collagen, type VI, alpha 6	-0.814835	0.000887212	0.00486317
ENSMUSG00000020163	Uqcr11	66594	ubiquinol-cytochrome c reductase, complex III subunit XI	-0.814561	0.000485733	0.00295769
ENSMUSG00000028063	Lmna	16905	lamin A	-0.814354	0.00498598	0.0196378
ENSMUSG00000079197	Psme2	19188	proteasome (prosome, macropain) activator subunit 2 (PA28 beta)	-0.814094	6.63121e-06	8.43634e-05
ENSMUSG00000078695	Cisd3	217149	CDGSH iron sulfur domain 3	-0.813742	0.0028743	0.012722
ENSMUSG00000029056	Pank4	269614	pantothenate kinase 4	-0.813406	0.00356659	0.0150641
ENSMUSG00000025470	Zfp511	69752	zinc finger protein 511	-0.813306	0.0034962	0.0148152
ENSMUSG00000028756	Pink1	68943	PTEN induced putative kinase 1	-0.81291	1.30261e-10	7.9606e-09
ENSMUSG00000001082	Mfsd10	68294	major facilitator superfamily domain containing 10	-0.812457	0.00785473	0.0282367
ENSMUSG00000056895	H2bu2	78303	H2B.U histone 2	-0.812239	0.00384138	0.0159758
ENSMUSG00000037938	Chchd5	66170	coiled-coil-helix-coiled-coil-helix domain containing 5	-0.812146	0.000770967	0.0043334
ENSMUSG00000024376	Epb41l4a	13824	erythrocyte membrane protein band 4.1 like 4a	-0.811185	0.0016861	0.00827104
ENSMUSG00000034538	Zfp418	232854	zinc finger protein 418	-0.810099	0.00655682	0.0245366
ENSMUSG00000043542	Zc2hc1a	67306	zinc finger, C2HC-type containing 1A	-0.810061	0.000721671	0.00409605
ENSMUSG00000047606	Ankrd34c	330998	ankyrin repeat domain 34C	-0.810051	0.0138845	0.0445057
ENSMUSG00000030869	Ndufab1	70316	NADH:ubiquinone oxidoreductase subunit AB1	-0.810008	4.23313e-07	8.38939e-06
ENSMUSG00000073176	Zfp449	78619	zinc finger protein 449	-0.809994	0.0124416	0.0408306
ENSMUSG00000031897	Psmb10	19171	proteasome (prosome, macropain) subunit, beta type 10	-0.809798	0.000147727	0.00109752
ENSMUSG00000003949	Hlf	217082	hepatic leukemia factor	-0.808921	1.25764e-10	7.77057e-09
ENSMUSG00000001120	Pcbp3	59093	poly(rC) binding protein 3	-0.808451	5.41601e-06	7.16705e-05
ENSMUSG00000057666	Gapdh	14433	glyceraldehyde-3-phosphate dehydrogenase	-0.80824	5.25439e-07	1.00119e-05
ENSMUSG00000032398	Snapc5	330959	small nuclear RNA activating complex, polypeptide 5	-0.807564	8.36779e-05	0.000684326
ENSMUSG00000004562	Arhgef40	268739	Rho guanine nucleotide exchange factor (GEF) 40	-0.803968	0.0048135	0.0190977
ENSMUSG00000032965	Ift57	73916	intraflagellar transport 57	-0.803609	1.08084e-05	0.000128191
ENSMUSG00000019849	Prep	19072	prolyl endopeptidase	-0.803473	5.84384e-05	0.000510986
ENSMUSG00000071528	Atp5md	66477	ATP synthase membrane subunit DAPIT	-0.803187	8.26033e-09	2.89215e-07
ENSMUSG00000038690	Atp5j2	57423	ATP synthase, H+ transporting, mitochondrial F0 complex, subunit F2	-0.802725	3.49737e-08	9.89508e-07
ENSMUSG00000029098	Acox3	80911	acyl-Coenzyme A oxidase 3, pristanoyl	-0.802575	4.66798e-05	0.000425665
ENSMUSG00000027793	Ccna1	12427	cyclin A1	-0.801128	0.00982484	0.0338422
ENSMUSG00000033972	Zfp944	319615	zinc finger protein 944	-0.80067	0.00225181	0.0104541
ENSMUSG00000032763	Ilvbl	216136	ilvB (bacterial acetolactate synthase)-like	-0.800273	0.00592801	0.0226423
ENSMUSG00000029047	Pex10	668173	peroxisomal biogenesis factor 10	-0.799498	0.000575394	0.00340495
ENSMUSG00000029535	Triap1	69076	TP53 regulated inhibitor of apoptosis 1	-0.799449	0.000122125	0.000936754
ENSMUSG00000023832	Acat2	110460	acetyl-Coenzyme A acetyltransferase 2	-0.799188	0.00051926	0.00312113
ENSMUSG00000041544	Disp3	242748	dispatched RND transporter family member 3	-0.798997	0.00414615	0.0169786
ENSMUSG00000041057	Wdr43	72515	WD repeat domain 43	-0.798162	7.96003e-05	0.000657054
ENSMUSG00000034471	Caskin2	140721	CASK-interacting protein 2	-0.798055	0.0096328	0.0332899
ENSMUSG00000028743	Akr7a5	110198	aldo-keto reductase family 7, member A5 (aflatoxin aldehyde reductase)	-0.797721	0.00457414	0.0183424
ENSMUSG00000003500	Impdh1	23917	inosine monophosphate dehydrogenase 1	-0.796993	0.0011644	0.00611913
ENSMUSG00000030079	Ruvbl1	56505	RuvB-like protein 1	-0.796687	0.000150134	0.00111299
ENSMUSG00000041696	Rasl12	70784	RAS-like, family 12	-0.796557	0.00308735	0.0134385
ENSMUSG00000032044	Rpusd4	71989	RNA pseudouridylate synthase domain containing 4	-0.795871	0.0088238	0.0309912
ENSMUSG00000028602	Tnfrsf8	21941	tumor necrosis factor receptor superfamily, member 8	-0.795728	6.02534e-06	7.80739e-05
ENSMUSG00000027602	Map1lc3a	66734	microtubule-associated protein 1 light chain 3 alpha	-0.795433	1.27745e-05	0.000147046
ENSMUSG00000029482	Aacs	78894	acetoacetyl-CoA synthetase	-0.794947	0.00149575	0.00749929
ENSMUSG00000015671	Psma2	19166	proteasome subunit alpha 2	-0.794681	2.1811e-10	1.25105e-08
ENSMUSG00000044156	Hepacam2	101202	HEPACAM family member 2	-0.794218	0.00510006	0.0199882
ENSMUSG00000032051	Fdx1	14148	ferredoxin 1	-0.792991	5.92446e-06	7.71235e-05
ENSMUSG00000044098	Rsbn1	229675	rosbin, round spermatid basic protein 1	-0.790831	0.000601664	0.00353057
ENSMUSG00000036764	Dnajc12	30045	DnaJ heat shock protein family (Hsp40) member C12	-0.790753	5.48218e-05	0.000484149
ENSMUSG00000051599	Pcdhb2	93873	protocadherin beta 2	-0.790535	0.00573735	0.0220594
ENSMUSG00000006920	Ezh1	14055	enhancer of zeste 1 polycomb repressive complex 2 subunit	-0.79052	1.0071e-06	1.71831e-05
ENSMUSG00000022212	Cpne6	12891	copine VI	-0.790375	6.00337e-05	0.000521602
ENSMUSG00000051251	Nhlh1	18071	nescient helix loop helix 1	-0.789781	0.00717943	0.026287
ENSMUSG00000035969	Rusc2	100213	RUN and SH3 domain containing 2	-0.789768	0.00134862	0.00687443
ENSMUSG00000068580	Zfyve19	72008	zinc finger, FYVE domain containing 19	-0.788833	0.00716836	0.0262522
ENSMUSG00000024387	Csnk2b	13001	casein kinase 2, beta polypeptide	-0.788739	3.35844e-08	9.58267e-07
ENSMUSG00000020677	Ddx52	78394	DExD box helicase 52	-0.788569	0.000712532	0.00405849
ENSMUSG00000028018	Gstcd	67553	glutathione S-transferase, C-terminal domain containing	-0.788124	0.00372913	0.0156133
ENSMUSG00000032033	Barx2	12023	BarH-like homeobox 2	-0.788013	0.00374011	0.0156398
ENSMUSG00000029575	Mmab	77697	methylmalonic aciduria (cobalamin deficiency) cblB type homolog (human)	-0.787126	0.00074706	0.00421171
ENSMUSG00000029918	Mrps33	14548	mitochondrial ribosomal protein S33	-0.786759	0.00342766	0.014591
ENSMUSG00000030206	Gsg1	14840	germ cell associated 1	-0.786412	0.0138883	0.0445094
ENSMUSG00000057836	Xlr3a	22445	X-linked lymphocyte-regulated 3A	-0.786335	0.0144378	0.0459027
ENSMUSG00000036941	Elac1	114615	elaC ribonuclease Z 1	-0.786307	1.29237e-05	0.000147874
ENSMUSG00000059361	Nrsn2	228777	neurensin 2	-0.784718	3.84546e-06	5.38108e-05
ENSMUSG00000042770	Hebp1	15199	heme binding protein 1	-0.784709	0.00235161	0.0108336
ENSMUSG00000047515	BC049715	320135	cDNA sequence BC049715	-0.784392	0.0151998	0.0477651
ENSMUSG00000005054	Cstb	13014	cystatin B	-0.784043	2.25433e-05	0.00023374
ENSMUSG00000051146	Camk2n2	73047	calcium/calmodulin-dependent protein kinase II inhibitor 2	-0.783883	1.63766e-12	1.65798e-10
ENSMUSG00000052419	2610001J05Rik	66520	RIKEN cDNA 2610001J05 gene	-0.783308	1.98194e-05	0.000211047
ENSMUSG00000025651	Uqcrc1	22273	ubiquinol-cytochrome c reductase core protein 1	-0.782236	0.000359487	0.00231034
ENSMUSG00000020381	Mrnip	68067	MRN complex interacting protein	-0.781686	0.0049987	0.0196634
ENSMUSG00000021243	Fcf1	73736	FCF1 rRNA processing protein	-0.779618	0.0100063	0.0342917
ENSMUSG00000022216	Psme1	19186	proteasome (prosome, macropain) activator subunit 1 (PA28 alpha)	-0.778991	5.29323e-07	1.00745e-05
ENSMUSG00000030603	Psmc4	23996	proteasome (prosome, macropain) 26S subunit, ATPase, 4	-0.778199	1.30202e-08	4.28214e-07
ENSMUSG00000020400	Tnip1	57783	TNFAIP3 interacting protein 1	-0.77816	0.00133213	0.00681349
ENSMUSG00000036775	Decr2	26378	2-4-dienoyl-Coenzyme A reductase 2, peroxisomal	-0.778013	0.000988455	0.00532094
ENSMUSG00000001270	Ckb	12709	creatine kinase, brain	-0.77699	0.00475633	0.018924
ENSMUSG00000020720	Psmd12	66997	proteasome (prosome, macropain) 26S subunit, non-ATPase, 12	-0.776872	7.75146e-07	1.37273e-05
ENSMUSG00000062380	Tubb3	22152	tubulin, beta 3 class III	-0.776521	3.02067e-07	6.35362e-06
ENSMUSG00000009894	Snap47	67826	synaptosomal-associated protein, 47	-0.775781	2.59215e-10	1.42365e-08
ENSMUSG00000047940	Stpg2	381476	sperm tail PG rich repeat containing 2	-0.775172	0.00443945	0.0179695
ENSMUSG00000073433	Arhgdig	14570	Rho GDP dissociation inhibitor (GDI) gamma	-0.77515	2.859e-06	4.17448e-05
ENSMUSG00000078862	Gm14326	665211	predicted gene 14326	-0.774447	0.000184613	0.00132416
ENSMUSG00000000552	Zfp385a	29813	zinc finger protein 385A	-0.774227	0.00989256	0.0340128
ENSMUSG00000028546	Elavl4	15572	ELAV like RNA binding protein 4	-0.772547	6.90798e-05	0.000586341
ENSMUSG00000032348	Gsta4	14860	glutathione S-transferase, alpha 4	-0.772263	1.71023e-05	0.000187367
ENSMUSG00000052406	Rexo4	227656	REX4, 3'-5' exonuclease	-0.772102	9.16788e-05	0.000740391
ENSMUSG00000043659	Npsr1	319239	neuropeptide S receptor 1	-0.771871	0.00197912	0.00943042
ENSMUSG00000000088	Cox5a	12858	cytochrome c oxidase subunit 5A	-0.771819	5.66745e-06	7.42957e-05
ENSMUSG00000034442	Trmt5	76357	TRM5 tRNA methyltransferase 5	-0.77069	0.00273033	0.0122037
ENSMUSG00000034974	Dapk3	13144	death-associated protein kinase 3	-0.770611	0.0140406	0.0448776
ENSMUSG00000022329	Stk3	56274	serine/threonine kinase 3	-0.770244	7.23709e-05	0.000609963
ENSMUSG00000038274	Fau	14109	Finkel-Biskis-Reilly murine sarcoma virus (FBR-MuSV) ubiquitously expressed (fox derived)	-0.770078	0.00036801	0.00235252
ENSMUSG00000040841	Six5	20475	sine oculis-related homeobox 5	-0.769987	0.00649262	0.0243506
ENSMUSG00000025869	Nop16	28126	NOP16 nucleolar protein	-0.769931	5.98025e-05	0.000520208
ENSMUSG00000079316	Rab9	56382	RAB9, member RAS oncogene family	-0.769632	3.44127e-06	4.89704e-05
ENSMUSG00000024959	Bad	12015	BCL2-associated agonist of cell death	-0.769354	0.00178565	0.00867834
ENSMUSG00000034932	Mrpl54	66047	mitochondrial ribosomal protein L54	-0.769326	0.0014955	0.00749929
ENSMUSG00000055681	Cope	59042	coatomer protein complex, subunit epsilon	-0.769313	0.000816466	0.0045526
ENSMUSG00000006021	Kptn	70394	kaptin	-0.768244	0.00594909	0.0227057
ENSMUSG00000028138	Adh5	11532	alcohol dehydrogenase 5 (class III), chi polypeptide	-0.767682	4.53935e-05	0.000416194
ENSMUSG00000015247	Nipsnap3b	66536	nipsnap homolog 3B	-0.766621	0.00839281	0.0298076
ENSMUSG00000059554	Ccdc28a	215814	coiled-coil domain containing 28A	-0.766338	0.000400469	0.00251224
ENSMUSG00000034800	Zfp661	72180	zinc finger protein 661	-0.766171	0.000937655	0.0050948
ENSMUSG00000027506	Tpd52	21985	tumor protein D52	-0.766104	2.1579e-06	3.25545e-05
ENSMUSG00000042589	Cux2	13048	cut-like homeobox 2	-0.765763	6.39527e-05	0.000549203
ENSMUSG00000020056	Washc3	67282	WASH complex subunit 3	-0.76547	0.00245394	0.0112037
ENSMUSG00000020121	Srgap1	117600	SLIT-ROBO Rho GTPase activating protein 1	-0.764929	7.69777e-05	0.000639489
ENSMUSG00000020485	Supt4a	20922	SPT4A, DSIF elongation factor subunit	-0.764779	1.81306e-09	7.77305e-08
ENSMUSG00000020402	Vdac1	22333	voltage-dependent anion channel 1	-0.764554	1.23913e-12	1.30155e-10
ENSMUSG00000031189	Aff2	14266	AF4/FMR2 family, member 2	-0.764199	3.39643e-05	0.000326174
ENSMUSG00000018809	Smyd4	319822	SET and MYND domain containing 4	-0.763991	0.00687301	0.0254595
ENSMUSG00000018433	Nol11	68979	nucleolar protein 11	-0.763547	4.67112e-05	0.000425721
ENSMUSG00000069184	Zfp72	238722	zinc finger protein 72	-0.761071	0.0136496	0.0439119
ENSMUSG00000027489	Necab3	56846	N-terminal EF-hand calcium binding protein 3	-0.760958	8.333e-06	0.000102297
ENSMUSG00000090641	Zfp712	78251	zinc finger protein 712	-0.760419	0.00256721	0.0116208
ENSMUSG00000024082	Ndufaf7	73694	NADH:ubiquinone oxidoreductase complex assembly factor 7	-0.759654	1.24433e-06	2.0462e-05
ENSMUSG00000018669	Cdk5rap3	80280	CDK5 regulatory subunit associated protein 3	-0.75875	0.00224621	0.010431
ENSMUSG00000053565	Eif3k	73830	eukaryotic translation initiation factor 3, subunit K	-0.758387	1.74231e-07	3.89378e-06
ENSMUSG00000014633	Cmc2	66531	COX assembly mitochondrial protein 2	-0.758122	0.000353126	0.00227992
ENSMUSG00000059278	Naa38	78304	N(alpha)-acetyltransferase 38, NatC auxiliary subunit	-0.758106	0.0137723	0.0442304
ENSMUSG00000007836	Hnrnpa0	77134	heterogeneous nuclear ribonucleoprotein A0	-0.758015	1.04816e-05	0.000125021
ENSMUSG00000034449	Dhrs11	192970	dehydrogenase/reductase (SDR family) member 11	-0.757733	0.00587292	0.0224676
ENSMUSG00000028773	Fabp3	14077	fatty acid binding protein 3, muscle and heart	-0.757259	0.000383098	0.00242043
ENSMUSG00000044894	Uqcrq	22272	ubiquinol-cytochrome c reductase, complex III subunit VII	-0.757013	0.00103176	0.00550702
ENSMUSG00000055923	Aasdh	231326	aminoadipate-semialdehyde dehydrogenase	-0.756826	0.00265823	0.0119386
ENSMUSG00000008036	Ap2s1	232910	adaptor-related protein complex 2, sigma 1 subunit	-0.756807	0.000141858	0.00106053
ENSMUSG00000041272	Tox	252838	thymocyte selection-associated high mobility group box	-0.756505	0.000178276	0.00128588
ENSMUSG00000029055	Plch2	269615	phospholipase C, eta 2	-0.75573	0.000527089	0.00316028
ENSMUSG00000040824	Snrpd2	107686	small nuclear ribonucleoprotein D2	-0.75553	2.56392e-05	0.00025906
ENSMUSG00000025955	Akr1cl	70861	aldo-keto reductase family 1, member C-like	-0.755195	1.26691e-05	0.000146134
ENSMUSG00000014907	Naf1	234344	nuclear assembly factor 1 ribonucleoprotein	-0.755057	0.000674947	0.0038873
ENSMUSG00000043648	Pld6	194908	phospholipase D family, member 6	-0.754887	0.00499306	0.019651
ENSMUSG00000019433	Gipc1	67903	GIPC PDZ domain containing family, member 1	-0.754327	4.99562e-05	0.000449927
ENSMUSG00000006641	Slc5a6	330064	solute carrier family 5 (sodium-dependent vitamin transporter), member 6	-0.754006	0.00364893	0.015331
ENSMUSG00000022377	Asap1	13196	ArfGAP with SH3 domain, ankyrin repeat and PH domain1	-0.753931	8.83404e-07	1.52116e-05
ENSMUSG00000026825	Dnm1	13429	dynamin 1	-0.753866	1.16894e-08	3.92904e-07
ENSMUSG00000022837	Iqcb1	320299	IQ calmodulin-binding motif containing 1	-0.753851	3.47101e-06	4.931e-05
ENSMUSG00000020476	Dbnl	13169	drebrin-like	-0.752996	0.00142084	0.00718587
ENSMUSG00000034949	Zfr2	103406	zinc finger RNA binding protein 2	-0.752466	0.0065666	0.0245623
ENSMUSG00000019814	Ltv1	353258	LTV1 ribosome biogenesis factor	-0.752053	0.00122164	0.00636419
ENSMUSG00000035062	Zc4h2	245522	zinc finger, C4H2 domain containing	-0.751344	0.000337101	0.00219076
ENSMUSG00000021187	Tc2n	74413	tandem C2 domains, nuclear	-0.751111	0.00919601	0.0320307
ENSMUSG00000087006	Gm13889	620695	predicted gene 13889	-0.751067	0.00206636	0.00975211
ENSMUSG00000020737	Jpt1	15374	Jupiter microtubule associated homolog 1	-0.751013	2.99418e-06	4.34919e-05
ENSMUSG00000036398	Ppp1r11	76497	protein phosphatase 1, regulatory inhibitor subunit 11	-0.750383	2.32704e-05	0.000239194
ENSMUSG00000022193	Psmb5	19173	proteasome (prosome, macropain) subunit, beta type 5	-0.750129	5.338e-05	0.000473906
ENSMUSG00000032231	Anxa2	12306	annexin A2	-0.750018	0.00483658	0.0191661
ENSMUSG00000073838	Tufm	233870	Tu translation elongation factor, mitochondrial	-0.749244	0.00140694	0.00712199
ENSMUSG00000032171	Pin1	23988	protein (peptidyl-prolyl cis/trans isomerase) NIMA-interacting 1	-0.749221	1.481e-05	0.000166152
ENSMUSG00000028636	Ppcs	106564	phosphopantothenoylcysteine synthetase	-0.748898	0.00266172	0.0119479
ENSMUSG00000091722	Siah3	380918	siah E3 ubiquitin protein ligase family member 3	-0.748092	0.00263583	0.0118602
ENSMUSG00000018012	Rac3	170758	Rac family small GTPase 3	-0.747991	0.0136228	0.0438486
ENSMUSG00000023456	Tpi1	21991	triosephosphate isomerase 1	-0.746556	2.78238e-09	1.10546e-07
ENSMUSG00000015668	Pdzd11	72621	PDZ domain containing 11	-0.74637	0.000935151	0.00508284
ENSMUSG00000041168	Lonp1	74142	lon peptidase 1, mitochondrial	-0.745809	0.00011069	0.000862825
ENSMUSG00000026546	Cfap45	71870	cilia and flagella associated protein 45	-0.745268	0.010685	0.0361823
ENSMUSG00000051978	Erich1	234086	glutamate rich 1	-0.744997	0.00822021	0.0293123
ENSMUSG00000032360	Hcrtr2	387285	hypocretin (orexin) receptor 2	-0.744904	0.00628286	0.023728
ENSMUSG00000087687	Pet100	100503890	PET100 homolog	-0.744207	0.000684876	0.00392872
ENSMUSG00000030093	Wnt7a	22421	wingless-type MMTV integration site family, member 7A	-0.743337	0.00553785	0.0213805
ENSMUSG00000026890	Lhx6	16874	LIM homeobox protein 6	-0.743323	3.88432e-07	7.82732e-06
ENSMUSG00000027222	Pex16	18633	peroxisomal biogenesis factor 16	-0.743314	0.0144876	0.0460348
ENSMUSG00000036617	Etl4	208618	enhancer trap locus 4	-0.742136	4.07707e-07	8.16556e-06
ENSMUSG00000071984	Fndc1	68655	fibronectin type III domain containing 1	-0.742106	0.0106129	0.0359742
ENSMUSG00000060032	H2aj	232440	H2J.A histone	-0.741756	0.00208935	0.00984126
ENSMUSG00000033633	Clec18a	353287	C-type lectin domain family 18, member A	-0.741671	0.000293053	0.00195827
ENSMUSG00000049760	Micos13	224904	mitochondrial contact site and cristae organizing system subunit 13	-0.741596	3.8638e-06	5.39776e-05
ENSMUSG00000021018	Polr2h	245841	polymerase (RNA) II (DNA directed) polypeptide H	-0.740563	0.000227694	0.00158518
ENSMUSG00000017764	Zswim1	71971	zinc finger SWIM-type containing 1	-0.740128	0.0025379	0.0115151
ENSMUSG00000004748	Mtfp1	67900	mitochondrial fission process 1	-0.739775	1.56707e-06	2.47288e-05
ENSMUSG00000025035	Arl3	56350	ADP-ribosylation factor-like 3	-0.739424	8.14915e-07	1.42959e-05
ENSMUSG00000054237	Fra10ac1	70567	FRA10AC1 homolog (human)	-0.739307	8.08997e-05	0.000664842
ENSMUSG00000027655	Dhx35	71715	DEAH (Asp-Glu-Ala-His) box polypeptide 35	-0.739287	0.0152677	0.0479286
ENSMUSG00000023004	Tuba1b	22143	tubulin, alpha 1B	-0.738656	3.51891e-13	4.3167e-11
ENSMUSG00000005656	Snx6	72183	sorting nexin 6	-0.738476	4.52259e-06	6.15438e-05
ENSMUSG00000020250	Txnrd1	50493	thioredoxin reductase 1	-0.737836	8.52838e-07	1.48219e-05
ENSMUSG00000018841	Rad51d	19364	RAD51 paralog D	-0.737515	0.000122507	0.000938402
ENSMUSG00000053693	Mast1	56527	microtubule associated serine/threonine kinase 1	-0.737318	0.00219756	0.0102345
ENSMUSG00000054850	Smim10l2a	320237	small integral membrane protein 10 like 2A	-0.736969	0.000391798	0.0024652
ENSMUSG00000023927	Satb1	20230	special AT-rich sequence binding protein 1	-0.735373	4.95628e-11	3.41374e-09
ENSMUSG00000035754	Wdr18	216156	WD repeat domain 18	-0.735284	0.00378123	0.0157833
ENSMUSG00000062070	Pgk1	18655	phosphoglycerate kinase 1	-0.73516	1.99156e-05	0.000211702
ENSMUSG00000022748	Cmss1	66497	cms small ribosomal subunit 1	-0.734379	0.00426492	0.0173676
ENSMUSG00000024953	Prdx5	54683	peroxiredoxin 5	-0.73402	2.1404e-05	0.000224122
ENSMUSG00000039936	Pik3cd	18707	phosphatidylinositol-4,5-bisphosphate 3-kinase catalytic subunit delta	-0.733962	0.000697564	0.00399022
ENSMUSG00000032316	Clk3	102414	CDC-like kinase 3	-0.732802	0.00297131	0.0130324
ENSMUSG00000022111	Uchl3	50933	ubiquitin carboxyl-terminal esterase L3 (ubiquitin thiolesterase)	-0.732608	0.000106244	0.000834755
ENSMUSG00000064037	Gpn1	74254	GPN-loop GTPase 1	-0.732515	0.000346612	0.00224217
ENSMUSG00000005846	Rsl1d1	66409	ribosomal L1 domain containing 1	-0.732416	0.0001578	0.00115706
ENSMUSG00000054499	Dedd2	67379	death effector domain-containing DNA binding protein 2	-0.732159	0.00115847	0.00609555
ENSMUSG00000041708	Mpped1	223726	metallophosphoesterase domain containing 1	-0.731832	1.79232e-10	1.04954e-08
ENSMUSG00000039195	1110008P14Rik	73737	RIKEN cDNA 1110008P14 gene	-0.731408	0.00219728	0.0102345
ENSMUSG00000029179	Zcchc4	78796	zinc finger, CCHC domain containing 4	-0.731301	0.00663086	0.024764
ENSMUSG00000003438	Timm50	66525	translocase of inner mitochondrial membrane 50	-0.730989	0.0128461	0.041937
ENSMUSG00000062825	Actg1	11465	actin, gamma, cytoplasmic 1	-0.730227	6.04165e-07	1.12302e-05
ENSMUSG00000002718	Cse1l	110750	chromosome segregation 1-like (S. cerevisiae)	-0.730186	2.77874e-08	8.17855e-07
ENSMUSG00000021555	Naa35	78689	N(alpha)-acetyltransferase 35, NatC auxiliary subunit	-0.730084	1.88399e-06	2.88626e-05
ENSMUSG00000001785	Pwp1	103136	PWP1 homolog, endonuclein	-0.729867	0.00457605	0.0183457
ENSMUSG00000054459	Vsnl1	26950	visinin-like 1	-0.729787	6.42133e-11	4.28242e-09
ENSMUSG00000000384	Tbrg4	21379	transforming growth factor beta regulated gene 4	-0.728273	0.000156886	0.00115237
ENSMUSG00000020427	Igfbp3	16009	insulin-like growth factor binding protein 3	-0.728031	0.0116019	0.0386637
ENSMUSG00000028367	Txn1	22166	thioredoxin 1	-0.727637	1.78616e-12	1.7868e-10
ENSMUSG00000001525	Tubb5	22154	tubulin, beta 5 class I	-0.727238	7.53005e-12	6.44e-10
ENSMUSG00000024414	Mrpl27	94064	mitochondrial ribosomal protein L27	-0.726963	3.32038e-05	0.000319967
ENSMUSG00000001964	Emd	13726	emerin	-0.726848	1.88191e-06	2.88571e-05
ENSMUSG00000022537	Tmem44	224090	transmembrane protein 44	-0.726765	0.00160449	0.00793551
ENSMUSG00000035960	Apex1	11792	apurinic/apyrimidinic endonuclease 1	-0.726629	0.000532443	0.00318669
ENSMUSG00000002661	Alkbh7	66400	alkB homolog 7	-0.726212	0.0028073	0.0124781
ENSMUSG00000035953	Pip4p1	219024	phosphatidylinositol-4,5-bisphosphate 4-phosphatase 1	-0.72619	0.00015372	0.00113557
ENSMUSG00000033933	Vhl	22346	von Hippel-Lindau tumor suppressor	-0.725431	0.000692838	0.00396723
ENSMUSG00000059173	Pde1a	18573	phosphodiesterase 1A, calmodulin-dependent	-0.724991	3.23689e-11	2.36518e-09
ENSMUSG00000024181	Mrpl28	68611	mitochondrial ribosomal protein L28	-0.724444	0.00250517	0.0113974
ENSMUSG00000020514	Mrpl22	216767	mitochondrial ribosomal protein L22	-0.723776	0.000719277	0.00408799
ENSMUSG00000043284	Tmem11	216821	transmembrane protein 11	-0.72339	2.58746e-06	3.83127e-05
ENSMUSG00000020132	Rab21	216344	RAB21, member RAS oncogene family	-0.72253	7.16477e-07	1.28911e-05
ENSMUSG00000024493	Lars	107045	leucyl-tRNA synthetase	-0.722454	0.00243604	0.0111341
ENSMUSG00000029401	Rilpl2	80291	Rab interacting lysosomal protein-like 2	-0.722182	0.00841017	0.0298629
ENSMUSG00000028609	Magoh	17149	mago homolog, exon junction complex core component	-0.721743	0.00259514	0.0117116
ENSMUSG00000020003	Pex7	18634	peroxisomal biogenesis factor 7	-0.721645	9.00715e-05	0.000730218
ENSMUSG00000031755	Bbs2	67378	Bardet-Biedl syndrome 2 (human)	-0.721169	0.000868472	0.00477916
ENSMUSG00000019505	Ubb	22187	ubiquitin B	-0.721065	2.02137e-07	4.45815e-06
ENSMUSG00000029641	Rasl11a	68895	RAS-like, family 11, member A	-0.720923	0.00162501	0.00801583
ENSMUSG00000014294	Ndufa2	17991	NADH:ubiquinone oxidoreductase subunit A2	-0.720876	2.09462e-05	0.000220289
ENSMUSG00000020474	Polm	54125	polymerase (DNA directed), mu	-0.720514	0.013063	0.0424801
ENSMUSG00000070283	Ndufaf3	66706	NADH:ubiquinone oxidoreductase complex assembly factor 3	-0.71999	1.2756e-05	0.000146934
ENSMUSG00000005034	Prkacb	18749	protein kinase, cAMP dependent, catalytic, beta	-0.719813	1.23531e-09	5.53615e-08
ENSMUSG00000024507	Hsd17b4	15488	hydroxysteroid (17-beta) dehydrogenase 4	-0.719398	0.00113082	0.00596315
ENSMUSG00000056328	Myh1	17879	myosin, heavy polypeptide 1, skeletal muscle, adult	-0.719005	0.00384424	0.0159798
ENSMUSG00000064254	Ethe1	66071	ethylmalonic encephalopathy 1	-0.71871	0.0017944	0.00871327
ENSMUSG00000029250	Polr2b	231329	polymerase (RNA) II (DNA directed) polypeptide B	-0.718551	0.000244892	0.00168813
ENSMUSG00000037032	Apbb1	11785	amyloid beta (A4) precursor protein-binding, family B, member 1	-0.718271	0.000237392	0.00164114
ENSMUSG00000027472	Pdrg1	68559	p53 and DNA damage regulated 1	-0.71826	0.000845502	0.00468188
ENSMUSG00000049600	Zbtb45	232879	zinc finger and BTB domain containing 45	-0.717724	0.0103906	0.0353349
ENSMUSG00000014769	Psmb1	19170	proteasome (prosome, macropain) subunit, beta type 1	-0.716857	1.04507e-08	3.58439e-07
ENSMUSG00000044533	Rps2	16898	ribosomal protein S2	-0.716784	2.40053e-05	0.000244802
ENSMUSG00000025371	Chmp6	208092	charged multivesicular body protein 6	-0.71631	0.00150648	0.00753507
ENSMUSG00000028101	Pias3	229615	protein inhibitor of activated STAT 3	-0.716039	0.0125816	0.0412256
ENSMUSG00000027534	Snx16	74718	sorting nexin 16	-0.715146	1.17723e-05	0.000137775
ENSMUSG00000025340	Rabgef1	56715	RAB guanine nucleotide exchange factor (GEF) 1	-0.715049	1.43893e-06	2.31413e-05
ENSMUSG00000033323	Ctdp1	67655	CTD (carboxy-terminal domain, RNA polymerase II, polypeptide A) phosphatase, subunit 1	-0.714792	0.00579981	0.0222487
ENSMUSG00000040034	Nup43	69912	nucleoporin 43	-0.714552	0.00949119	0.0328749
ENSMUSG00000020116	Pno1	66249	partner of NOB1 homolog	-0.713881	0.000289498	0.00193773
ENSMUSG00000049960	Mrps16	66242	mitochondrial ribosomal protein S16	-0.713676	0.000376372	0.00239052
ENSMUSG00000028223	Decr1	67460	2,4-dienoyl CoA reductase 1, mitochondrial	-0.713043	0.000869502	0.00478326
ENSMUSG00000002957	Ap2a2	11772	adaptor-related protein complex 2, alpha 2 subunit	-0.712912	3.11374e-07	6.50865e-06
ENSMUSG00000026048	Ercc5	22592	excision repair cross-complementing rodent repair deficiency, complementation group 5	-0.712764	8.56986e-07	1.48339e-05
ENSMUSG00000021585	Cast	12380	calpastatin	-0.711974	0.00101376	0.00543106
ENSMUSG00000027752	Exosc8	69639	exosome component 8	-0.711448	0.000522367	0.00313559
ENSMUSG00000022217	Emc9	85308	ER membrane protein complex subunit 9	-0.711139	0.0001025	0.000811104
ENSMUSG00000060397	Zfp128	243833	zinc finger protein 128	-0.710476	0.00358382	0.0151141
ENSMUSG00000041429	Nthl1	18207	nth (endonuclease III)-like 1 (E.coli)	-0.709863	0.00686249	0.0254369
ENSMUSG00000028447	Dctn3	53598	dynactin 3	-0.709841	1.26012e-05	0.000145651
ENSMUSG00000037772	Mrpl23	19935	mitochondrial ribosomal protein L23	-0.70974	0.00510053	0.0199882
ENSMUSG00000038077	Kcna6	16494	potassium voltage-gated channel, shaker-related, subfamily, member 6	-0.708401	1.82052e-05	0.000196631
ENSMUSG00000047945	Marcksl1	17357	MARCKS-like 1	-0.707195	8.04746e-05	0.000662968
ENSMUSG00000029557	Mrm2	68017	mitochondrial rRNA methyltransferase 2	-0.707138	0.00900702	0.0314703
ENSMUSG00000062190	Lancl2	71835	LanC (bacterial lantibiotic synthetase component C)-like 2	-0.707022	1.28271e-07	3.02347e-06
ENSMUSG00000028383	Hsdl2	72479	hydroxysteroid dehydrogenase like 2	-0.706477	4.40621e-05	0.000405313
ENSMUSG00000031429	Psmd10	53380	proteasome (prosome, macropain) 26S subunit, non-ATPase, 10	-0.706379	0.000452049	0.00277268
ENSMUSG00000020903	Stx8	55943	syntaxin 8	-0.705677	6.05513e-05	0.00052482
ENSMUSG00000021144	Mta1	116870	metastasis associated 1	-0.70542	0.000158441	0.00116075
ENSMUSG00000005161	Prdx2	21672	peroxiredoxin 2	-0.705025	4.18531e-10	2.17094e-08
ENSMUSG00000033712	Ccar2	219158	cell cycle activator and apoptosis regulator 2	-0.704682	0.000127968	0.000974899
ENSMUSG00000030347	D6Wsu163e	28040	DNA segment, Chr 6, Wayne State University 163, expressed	-0.704558	2.72949e-05	0.000272067
ENSMUSG00000003235	Eif2b5	224045	eukaryotic translation initiation factor 2B, subunit 5 epsilon	-0.704517	5.02089e-05	0.000451719
ENSMUSG00000051518	Rps19bp1	66538	ribosomal protein S19 binding protein 1	-0.704512	0.00024835	0.00170706
ENSMUSG00000022204	Ngdn	68966	neuroguidin, EIF4E binding protein	-0.704474	0.000406766	0.00254984
ENSMUSG00000036850	Mrpl41	107733	mitochondrial ribosomal protein L41	-0.703857	2.63973e-07	5.62273e-06
ENSMUSG00000023495	Pcbp4	59092	poly(rC) binding protein 4	-0.703439	0.00239142	0.0109749
ENSMUSG00000026820	Ptges2	96979	prostaglandin E synthase 2	-0.702988	0.000399697	0.00250833
ENSMUSG00000038812	Trmt112	67674	tRNA methyltransferase 11-2	-0.702913	0.00804149	0.0287849
ENSMUSG00000026289	Atg16l1	77040	autophagy related 16-like 1 (S. cerevisiae)	-0.702843	0.000210435	0.00148159
ENSMUSG00000034813	Grip1	74053	glutamate receptor interacting protein 1	-0.70273	0.00764836	0.0276724
ENSMUSG00000067847	Romo1	67067	reactive oxygen species modulator 1	-0.702685	0.00219692	0.0102345
ENSMUSG00000024347	Psd2	74002	pleckstrin and Sec7 domain containing 2	-0.702556	0.0001509	0.00111769
ENSMUSG00000039509	Nup133	234865	nucleoporin 133	-0.70051	0.000315165	0.00207306
ENSMUSG00000028798	Eif3i	54709	eukaryotic translation initiation factor 3, subunit I	-0.700361	5.55184e-07	1.04134e-05
ENSMUSG00000019478	Rab4a	19341	RAB4A, member RAS oncogene family	-0.700173	3.72348e-05	0.000352149
ENSMUSG00000035048	Anapc13	69010	anaphase promoting complex subunit 13	-0.700156	0.000247968	0.00170583
ENSMUSG00000035357	Pdzrn3	55983	PDZ domain containing RING finger 3	-0.699874	0.00989799	0.0340245
ENSMUSG00000039745	Htatip2	53415	HIV-1 Tat interactive protein 2	-0.699579	0.0155105	0.0485418
ENSMUSG00000020802	Ube2o	217342	ubiquitin-conjugating enzyme E2O	-0.699499	0.000535084	0.00319795
ENSMUSG00000001333	Sync	68828	syncoilin	-0.699194	0.00454706	0.0182714
ENSMUSG00000041977	Arhgef11	213498	Rho guanine nucleotide exchange factor (GEF) 11	-0.699105	3.24138e-07	6.71696e-06
ENSMUSG00000002010	Idh3g	15929	isocitrate dehydrogenase 3 (NAD+), gamma	-0.699047	1.68098e-06	2.63041e-05
ENSMUSG00000039954	Stk32a	269019	serine/threonine kinase 32A	-0.698939	0.00169544	0.00830476
ENSMUSG00000031505	Naxd	69225	NAD(P)HX dehydratase	-0.698867	0.00713122	0.026139
ENSMUSG00000031971	Ccsap	73420	centriole, cilia and spindle associated protein	-0.697719	2.62599e-05	0.000264108
ENSMUSG00000019368	Sec14l4	103655	SEC14-like lipid binding 4	-0.69743	0.00379479	0.0158212
ENSMUSG00000020321	Mdh1	17449	malate dehydrogenase 1, NAD (soluble)	-0.69742	1.06031e-09	4.84227e-08
ENSMUSG00000002768	Mea1	17256	male enhanced antigen 1	-0.696923	2.80681e-05	0.000278297
ENSMUSG00000040356	Skiv2l	108077	superkiller viralicidic activity 2-like (S. cerevisiae)	-0.696898	0.00590348	0.0225537
ENSMUSG00000063229	Ldha	16828	lactate dehydrogenase A	-0.696255	1.53852e-07	3.50356e-06
ENSMUSG00000040659	Efhd2	27984	EF hand domain containing 2	-0.696089	0.000156514	0.00115109
ENSMUSG00000030042	Pole4	66979	polymerase (DNA-directed), epsilon 4 (p12 subunit)	-0.696032	8.29845e-06	0.000102096
ENSMUSG00000063661	Krt73	223915	keratin 73	-0.695462	0.00391567	0.0161943
ENSMUSG00000031523	Dlc1	50768	deleted in liver cancer 1	-0.695245	1.57203e-06	2.47837e-05
ENSMUSG00000018736	Ndel1	83431	nudE neurodevelopment protein 1 like 1	-0.694881	0.000286198	0.0019204
ENSMUSG00000062963	Ufc1	66155	ubiquitin-fold modifier conjugating enzyme 1	-0.693865	3.24426e-06	4.68814e-05
ENSMUSG00000037152	Ndufc1	66377	NADH:ubiquinone oxidoreductase subunit C1	-0.693767	0.000926251	0.00503936
ENSMUSG00000022552	Sharpin	106025	SHANK-associated RH domain interacting protein	-0.693229	0.000156813	0.00115234
ENSMUSG00000020312	Shc2	216148	SHC (Src homology 2 domain containing) transforming protein 2	-0.692977	8.81959e-05	0.000717154
ENSMUSG00000047261	Gap43	14432	growth associated protein 43	-0.692176	4.78264e-08	1.3006e-06
ENSMUSG00000021996	Esd	13885	esterase D/formylglutathione hydrolase	-0.692036	1.18716e-05	0.000138455
ENSMUSG00000019797	Mtres1	67851	mitochondrial transcription rescue factor 1	-0.692016	1.90953e-05	0.000204535
ENSMUSG00000013822	Elof1	66126	ELF1 homolog, elongation factor 1	-0.690982	0.000220022	0.00154327
ENSMUSG00000045259	Klhdc9	68874	kelch domain containing 9	-0.690707	0.00897107	0.03141
ENSMUSG00000020850	Prpf8	192159	pre-mRNA processing factor 8	-0.6906	1.11905e-07	2.67266e-06
ENSMUSG00000035397	Klf16	118445	Kruppel-like factor 16	-0.690484	0.000707784	0.00403732
ENSMUSG00000025086	Trub1	72133	TruB pseudouridine (psi) synthase family member 1	-0.689837	1.8138e-06	2.79915e-05
ENSMUSG00000029552	Tes	21753	testis derived transcript	-0.689375	0.00165226	0.00813116
ENSMUSG00000024474	Ik	24010	IK cytokine	-0.689294	3.9229e-08	1.0988e-06
ENSMUSG00000062691	Cebpzos	68554	CCAAT/enhancer binding protein (C/EBP), zeta, opposite strand	-0.688928	0.00158672	0.0078685
ENSMUSG00000023110	Prmt5	27374	protein arginine N-methyltransferase 5	-0.68886	3.43983e-05	0.000329777
ENSMUSG00000009394	Syn2	20965	synapsin II	-0.688419	3.02299e-10	1.61284e-08
ENSMUSG00000018858	Mrpl58	68572	mitochondrial ribosomal protein L58	-0.688302	2.82876e-07	5.98741e-06
ENSMUSG00000022195	6030458C11Rik	77877	RIKEN cDNA 6030458C11 gene	-0.688065	6.99019e-06	8.82351e-05
ENSMUSG00000031139	Mcf2	109904	mcf.2 transforming sequence	-0.688007	0.00278605	0.0124033
ENSMUSG00000016382	Pls3	102866	plastin 3 (T-isoform)	-0.687555	4.87773e-07	9.40082e-06
ENSMUSG00000029610	Aimp2	231872	aminoacyl tRNA synthetase complex-interacting multifunctional protein 2	-0.687377	0.0101022	0.0345358
ENSMUSG00000035139	Secisbp2	75420	SECIS binding protein 2	-0.687189	0.00241958	0.0110838
ENSMUSG00000028889	Yrdc	230734	yrdC domain containing (E.coli)	-0.68678	0.0035838	0.0151141
ENSMUSG00000031297	Slc7a3	11989	solute carrier family 7 (cationic amino acid transporter, y+ system), member 3	-0.686371	0.0128055	0.0418368
ENSMUSG00000005483	Dnajb1	81489	DnaJ heat shock protein family (Hsp40) member B1	-0.686185	1.56752e-05	0.000174231
ENSMUSG00000079557	Marchf2	224703	membrane associated ring-CH-type finger 2	-0.685997	0.000268792	0.00182224
ENSMUSG00000030323	Ift122	81896	intraflagellar transport 122	-0.68575	0.00363644	0.01529
ENSMUSG00000039041	Adrm1	56436	adhesion regulating molecule 1	-0.685693	0.00442487	0.0179234
ENSMUSG00000040097	Flywch1	224613	FLYWCH-type zinc finger 1	-0.685672	0.00164376	0.00809408
ENSMUSG00000026817	Ak1	11636	adenylate kinase 1	-0.685492	6.59874e-05	0.000563795
ENSMUSG00000005045	Chd5	269610	chromodomain helicase DNA binding protein 5	-0.684841	2.25451e-05	0.00023374
ENSMUSG00000020022	Ndufa12	66414	NADH:ubiquinone oxidoreductase subunit A12	-0.684802	1.50706e-05	0.00016829
ENSMUSG00000031782	Coq9	67914	coenzyme Q9	-0.68474	0.000134827	0.00101655
ENSMUSG00000021113	Snapc1	75627	small nuclear RNA activating complex, polypeptide 1	-0.68468	4.11121e-09	1.55966e-07
ENSMUSG00000041124	Msantd4	78100	Myb/SANT-like DNA-binding domain containing 4 with coiled-coils	-0.684655	4.1815e-06	5.77914e-05
ENSMUSG00000001707	Eef1e1	66143	eukaryotic translation elongation factor 1 epsilon 1	-0.684359	7.00296e-05	0.000593504
ENSMUSG00000045284	Dcaf12l1	245404	DDB1 and CUL4 associated factor 12-like 1	-0.684085	0.00300733	0.0131446
ENSMUSG00000004698	Hdac9	79221	histone deacetylase 9	-0.683994	4.79128e-11	3.31367e-09
ENSMUSG00000024121	Atp6v0c	11984	ATPase, H+ transporting, lysosomal V0 subunit C	-0.683671	0.0122354	0.0403508
ENSMUSG00000023572	Ccndbp1	17151	cyclin D-type binding-protein 1	-0.68363	6.90762e-07	1.25367e-05
ENSMUSG00000078427	Sarnp	66118	SAP domain containing ribonucleoprotein	-0.683121	0.00149553	0.00749929
ENSMUSG00000014551	Mrps25	64658	mitochondrial ribosomal protein S25	-0.682451	4.33248e-07	8.55602e-06
ENSMUSG00000043372	Hexim2	71059	hexamethylene bis-acetamide inducible 2	-0.682435	0.00407705	0.0167446
ENSMUSG00000031026	Trim66	330627	tripartite motif-containing 66	-0.682407	0.0114923	0.0383746
ENSMUSG00000038546	Ranbp9	56705	RAN binding protein 9	-0.682236	3.43899e-06	4.89704e-05
ENSMUSG00000031633	Slc25a4	11739	solute carrier family 25 (mitochondrial carrier, adenine nucleotide translocator), member 4	-0.682183	8.18457e-06	0.000100843
ENSMUSG00000033938	Ndufb7	66916	NADH:ubiquinone oxidoreductase subunit B7	-0.681911	0.0086595	0.030561
ENSMUSG00000025153	Fasn	14104	fatty acid synthase	-0.681679	0.001005	0.00539275
ENSMUSG00000041263	Rusc1	72296	RUN and SH3 domain containing 1	-0.681262	2.96896e-05	0.000291621
ENSMUSG00000059248	Septin9	53860	septin 9	-0.68066	0.00203359	0.00963804
ENSMUSG00000037364	Srrt	83701	serrate RNA effector molecule homolog (Arabidopsis)	-0.680317	0.000124934	0.000955249
ENSMUSG00000029815	Malsu1	75593	mitochondrial assembly of ribosomal large subunit 1	-0.680293	0.00117833	0.00616917
ENSMUSG00000033706	Smyd5	232187	SET and MYND domain containing 5	-0.67962	0.000299282	0.00198891
ENSMUSG00000063856	Gpx1	14775	glutathione peroxidase 1	-0.679554	2.84204e-05	0.000281126
ENSMUSG00000041278	Ttc1	66827	tetratricopeptide repeat domain 1	-0.679417	2.33713e-05	0.000240085
ENSMUSG00000020283	Pex13	72129	peroxisomal biogenesis factor 13	-0.679327	8.374e-06	0.00010265
ENSMUSG00000026123	Plekhb2	226971	pleckstrin homology domain containing, family B (evectins) member 2	-0.679314	1.72214e-06	2.68468e-05
ENSMUSG00000022055	Nefl	18039	neurofilament, light polypeptide	-0.678299	7.80879e-05	0.000647113
ENSMUSG00000059518	Znhit1	70103	zinc finger, HIT domain containing 1	-0.677573	0.00149989	0.00751187
ENSMUSG00000026939	Tmem141	51875	transmembrane protein 141	-0.67748	0.00146743	0.00738595
ENSMUSG00000003123	Lipe	16890	lipase, hormone sensitive	-0.677095	0.00522445	0.0204191
ENSMUSG00000007564	Ppp2r1a	51792	protein phosphatase 2, regulatory subunit A, alpha	-0.67679	5.48754e-08	1.45006e-06
ENSMUSG00000049422	Chchd10	103172	coiled-coil-helix-coiled-coil-helix domain containing 10	-0.6766	2.35653e-05	0.000241487
ENSMUSG00000005779	Psmb4	19172	proteasome (prosome, macropain) subunit, beta type 4	-0.676465	2.36206e-09	9.66455e-08
ENSMUSG00000028741	Mrto4	69902	mRNA turnover 4, ribosome maturation factor	-0.676146	0.000850521	0.00470502
ENSMUSG00000029674	Limk1	16885	LIM-domain containing, protein kinase	-0.675819	8.31276e-05	0.000680488
ENSMUSG00000062753	AI413582	106672	expressed sequence AI413582	-0.675775	0.00393652	0.0162548
ENSMUSG00000061904	Slc25a3	18674	solute carrier family 25 (mitochondrial carrier, phosphate carrier), member 3	-0.675734	0.000237143	0.00164104
ENSMUSG00000055733	Nap1l3	54561	nucleosome assembly protein 1-like 3	-0.675507	4.39676e-07	8.65245e-06
ENSMUSG00000039578	Ccser1	232035	coiled-coil serine rich 1	-0.674303	0.00476901	0.0189655
ENSMUSG00000037643	Prkci	18759	protein kinase C, iota	-0.674176	5.15371e-05	0.000461199
ENSMUSG00000015766	Eps8	13860	epidermal growth factor receptor pathway substrate 8	-0.67412	0.000198546	0.00140851
ENSMUSG00000031078	Cttn	13043	cortactin	-0.674076	0.000121847	0.000935475
ENSMUSG00000018340	Anxa6	11749	annexin A6	-0.673626	0.000835505	0.00463722
ENSMUSG00000036613	Eipr1	380752	EARP complex and GARP complex interacting protein 1	-0.673236	0.00158077	0.00784826
ENSMUSG00000025393	Atp5b	11947	ATP synthase, H+ transporting mitochondrial F1 complex, beta subunit	-0.672861	4.64499e-09	1.73475e-07
ENSMUSG00000072949	Acot1	26897	acyl-CoA thioesterase 1	-0.672808	0.00775565	0.0279823
ENSMUSG00000030750	Nsmce1	67711	NSE1 homolog, SMC5-SMC6 complex component	-0.672754	0.00578997	0.0222262
ENSMUSG00000030591	Psmd8	57296	proteasome (prosome, macropain) 26S subunit, non-ATPase, 8	-0.67243	8.02805e-07	1.41425e-05
ENSMUSG00000017211	Gsdma2	76758	gasdermin A2	-0.672238	0.000920485	0.00501123
ENSMUSG00000078784	Rbis	69126	ribosomal biogenesis factor	-0.672144	0.0127831	0.0417717
ENSMUSG00000029632	Ndufa4	17992	Ndufa4, mitochondrial complex associated	-0.671808	1.28987e-05	0.000147768
ENSMUSG00000020122	Egfr	13649	epidermal growth factor receptor	-0.671007	0.00541245	0.0210219
ENSMUSG00000022551	Cyc1	66445	cytochrome c-1	-0.670665	4.08132e-07	8.16556e-06
ENSMUSG00000030697	Ppp4c	56420	protein phosphatase 4, catalytic subunit	-0.670449	0.000360587	0.00231652
ENSMUSG00000070287	Slc35g2	245020	solute carrier family 35, member G2	-0.670225	0.00728699	0.0266113
ENSMUSG00000061111	Mcrip1	192173	MAPK regulated corepressor interacting protein 1	-0.670137	0.000155215	0.00114359
ENSMUSG00000034744	Nagk	56174	N-acetylglucosamine kinase	-0.669947	0.000200229	0.00141746
ENSMUSG00000016349	Eef1a2	13628	eukaryotic translation elongation factor 1 alpha 2	-0.669276	0.00323954	0.0139707
ENSMUSG00000018537	Pcgf2	22658	polycomb group ring finger 2	-0.669056	0.0122432	0.0403562
ENSMUSG00000020415	Pttg1	30939	pituitary tumor-transforming gene 1	-0.669007	0.000386032	0.00243531
ENSMUSG00000031432	Prps1	19139	phosphoribosyl pyrophosphate synthetase 1	-0.668739	0.000325489	0.00212764
ENSMUSG00000027018	Hat1	107435	histone aminotransferase 1	-0.668401	0.00352843	0.0149228
ENSMUSG00000057236	Rbbp4	19646	retinoblastoma binding protein 4, chromatin remodeling factor	-0.668104	0.000338669	0.00220006
ENSMUSG00000066026	Dhrs3	20148	dehydrogenase/reductase (SDR family) member 3	-0.667442	0.0120333	0.0397703
ENSMUSG00000030647	Ndufc2	68197	NADH:ubiquinone oxidoreductase subunit C2	-0.667293	3.04818e-07	6.40347e-06
ENSMUSG00000067377	Tspan6	56496	tetraspanin 6	-0.667208	0.00671095	0.0250187
ENSMUSG00000003848	Nob1	67619	NIN1/RPN12 binding protein 1 homolog	-0.66683	0.00859144	0.0304038
ENSMUSG00000009035	Tmem184b	223693	transmembrane protein 184b	-0.66651	0.00124284	0.00645063
ENSMUSG00000026202	Tuba4a	22145	tubulin, alpha 4A	-0.665925	1.71681e-07	3.8419e-06
ENSMUSG00000041215	Yeats2	208146	YEATS domain containing 2	-0.665672	0.000164107	0.00119756
ENSMUSG00000033805	Ephx4	384214	epoxide hydrolase 4	-0.665574	8.35425e-07	1.46099e-05
ENSMUSG00000035765	Dym	69190	dymeclin	-0.665489	0.000290533	0.00194375
ENSMUSG00000029176	Anapc4	52206	anaphase promoting complex subunit 4	-0.665303	7.8467e-05	0.000649934
ENSMUSG00000056770	Setd3	52690	SET domain containing 3	-0.665112	1.31284e-06	2.13794e-05
ENSMUSG00000039782	Cpeb2	231207	cytoplasmic polyadenylation element binding protein 2	-0.664708	1.31955e-05	0.000150348
ENSMUSG00000041881	Ndufa7	66416	NADH:ubiquinone oxidoreductase subunit A7	-0.66411	0.00137883	0.00698812
ENSMUSG00000029223	Uchl1	22223	ubiquitin carboxy-terminal hydrolase L1	-0.664096	0.000223047	0.00155759
ENSMUSG00000026810	Dpm2	13481	dolichol-phosphate (beta-D) mannosyltransferase 2	-0.663726	0.00319064	0.0137987
ENSMUSG00000070576	Mn1	433938	meningioma 1	-0.663669	0.00294634	0.012959
ENSMUSG00000026895	Ndufa8	68375	NADH:ubiquinone oxidoreductase subunit A8	-0.662662	0.00127081	0.00656538
ENSMUSG00000004902	Slc25a18	71803	solute carrier family 25 (mitochondrial carrier), member 18	-0.661743	0.00756437	0.0274231
ENSMUSG00000031879	Ciao2b	68523	cytosolic iron-sulfur assembly component 2B	-0.661698	0.00384264	0.0159771
ENSMUSG00000039382	Wdr45	54636	WD repeat domain 45	-0.660813	0.00149454	0.00749929
ENSMUSG00000004849	Ap1s1	11769	adaptor protein complex AP-1, sigma 1	-0.660726	1.81447e-05	0.000196103
ENSMUSG00000109946	Brd3os	100504116	bromodomain containing 3, opposite strand	-0.660464	0.00193668	0.00926761
ENSMUSG00000033216	Eefsec	65967	eukaryotic elongation factor, selenocysteine-tRNA-specific	-0.659871	0.00720851	0.0263771
ENSMUSG00000025224	Gbf1	107338	golgi-specific brefeldin A-resistance factor 1	-0.65982	0.000147523	0.00109654
ENSMUSG00000071014	Ndufb6	230075	NADH:ubiquinone oxidoreductase subunit B6	-0.659179	0.000398807	0.00250555
ENSMUSG00000004937	Sgta	52551	small glutamine-rich tetratricopeptide repeat (TPR)-containing, alpha	-0.658443	7.99392e-05	0.000659278
ENSMUSG00000014498	Ankrd52	237615	ankyrin repeat domain 52	-0.6583	0.000108974	0.000850635
ENSMUSG00000063522	Ly6m	67038	lymphocyte antigen 6 complex, locus M	-0.657547	0.00532888	0.020757
ENSMUSG00000018565	Elp5	54351	elongator acetyltransferase complex subunit 5	-0.657401	2.68959e-06	3.9685e-05
ENSMUSG00000042870	Tom1	21968	target of myb1 trafficking protein	-0.6569	0.0115557	0.0385405
ENSMUSG00000004366	Sst	20604	somatostatin	-0.656347	4.07088e-07	8.16411e-06
ENSMUSG00000038722	Bud31	231889	BUD31 homolog	-0.655964	0.000139905	0.00104827
ENSMUSG00000024426	Atat1	73242	alpha tubulin acetyltransferase 1	-0.655717	2.23368e-06	3.34574e-05
ENSMUSG00000027411	Vps16	80743	VSP16 CORVET/HOPS core subunit	-0.655459	0.00685752	0.0254241
ENSMUSG00000040350	Trim7	94089	tripartite motif-containing 7	-0.655216	0.00379624	0.0158233
ENSMUSG00000033966	Cdkl4	381113	cyclin-dependent kinase-like 4	-0.654767	0.000311985	0.00205456
ENSMUSG00000039579	Grin3a	242443	glutamate receptor ionotropic, NMDA3A	-0.654658	0.00465775	0.0186022
ENSMUSG00000022416	Cacna1i	239556	calcium channel, voltage-dependent, alpha 1I subunit	-0.65289	0.00637229	0.0239796
ENSMUSG00000020089	Ppa1	67895	pyrophosphatase (inorganic) 1	-0.652606	8.89115e-07	1.52942e-05
ENSMUSG00000059734	Ndufs8	225887	NADH:ubiquinone oxidoreductase core subunit S8	-0.652383	0.000711426	0.00405433
ENSMUSG00000025362	Rps26	27370	ribosomal protein S26	-0.651715	0.00675543	0.0251454
ENSMUSG00000020537	Drg2	13495	developmentally regulated GTP binding protein 2	-0.651342	0.00188276	0.00905343
ENSMUSG00000068739	Sars	20226	seryl-aminoacyl-tRNA synthetase	-0.651298	6.46547e-07	1.18753e-05
ENSMUSG00000037747	Phyhipl	70911	phytanoyl-CoA hydroxylase interacting protein-like	-0.651103	7.95076e-06	9.83226e-05
ENSMUSG00000030410	Dmwd	13401	dystrophia myotonica-containing WD repeat motif	-0.65072	0.00282084	0.0125261
ENSMUSG00000034209	Rasl10a	75668	RAS-like, family 10, member A	-0.65054	0.00126893	0.00655771
ENSMUSG00000024570	Rbfa	68731	ribosome binding factor A	-0.650043	0.010746	0.0363302
ENSMUSG00000015748	Prpf3	70767	pre-mRNA processing factor 3	-0.650042	0.00173939	0.00848788
ENSMUSG00000055333	Fat2	245827	FAT atypical cadherin 2	-0.649131	0.00643613	0.0241826
ENSMUSG00000025428	Atp5a1	11946	ATP synthase, H+ transporting, mitochondrial F1 complex, alpha subunit 1	-0.649091	1.56042e-09	6.79388e-08
ENSMUSG00000043881	Kbtbd7	211255	kelch repeat and BTB (POZ) domain containing 7	-0.648499	1.67316e-05	0.000184025
ENSMUSG00000003955	Fam162a	70186	family with sequence similarity 162, member A	-0.648152	0.000774566	0.00434927
ENSMUSG00000022956	Atp5o	28080	ATP synthase, H+ transporting, mitochondrial F1 complex, O subunit	-0.646989	1.05443e-05	0.000125679
ENSMUSG00000037259	Dzank1	241688	double zinc ribbon and ankyrin repeat domains 1	-0.646973	4.3775e-08	1.2021e-06
ENSMUSG00000032898	Fbxo21	231670	F-box protein 21	-0.646954	6.59873e-09	2.37979e-07
ENSMUSG00000049751	Rpl36al	66483	ribosomal protein L36A-like	-0.646816	0.00935421	0.0324909
ENSMUSG00000032396	Dis3l	213550	DIS3 like exosome 3'-5' exoribonuclease	-0.645852	0.00296944	0.0130299
ENSMUSG00000092060	Bend4	666938	BEN domain containing 4	-0.645332	0.00430721	0.0175144
ENSMUSG00000055720	Ubl7	69459	ubiquitin-like 7 (bone marrow stromal cell-derived)	-0.644753	0.00062936	0.00366875
ENSMUSG00000011837	Snapc2	102209	small nuclear RNA activating complex, polypeptide 2	-0.644117	0.00169757	0.00830793
ENSMUSG00000032294	Pkm	18746	pyruvate kinase, muscle	-0.644014	8.46424e-07	1.47319e-05
ENSMUSG00000072825	Cep170b	217882	centrosomal protein 170B	-0.643686	5.6254e-09	2.07781e-07
ENSMUSG00000046748	Tmem45a2	69457	transmembrane protein 45A2	-0.643545	0.000992519	0.00533769
ENSMUSG00000036427	Gpi1	14751	glucose-6-phosphate isomerase 1	-0.643217	1.05608e-05	0.000125786
ENSMUSG00000025235	Bbs4	102774	Bardet-Biedl syndrome 4 (human)	-0.643031	9.22908e-06	0.000111586
ENSMUSG00000029602	Rasal1	19415	RAS protein activator like 1 (GAP1 like)	-0.642783	0.013458	0.0434535
ENSMUSG00000033065	Pfkm	18642	phosphofructokinase, muscle	-0.642292	8.01727e-07	1.41383e-05
ENSMUSG00000024423	Impact	16210	impact, RWD domain protein	-0.642179	0.000112812	0.000877261
ENSMUSG00000044573	Acp1	11431	acid phosphatase 1, soluble	-0.641809	0.000117415	0.000907673
ENSMUSG00000027952	Pmvk	68603	phosphomevalonate kinase	-0.641771	0.00331785	0.0142535
ENSMUSG00000041241	Mul1	68350	mitochondrial ubiquitin ligase activator of NFKB 1	-0.641695	0.00336438	0.0143933
ENSMUSG00000027384	Ndufaf5	69487	NADH:ubiquinone oxidoreductase complex assembly factor 5	-0.640856	9.72198e-05	0.000776927
ENSMUSG00000013593	Ndufs2	226646	NADH:ubiquinone oxidoreductase core subunit S2	-0.63993	1.32284e-05	0.00015045
ENSMUSG00000050552	Lamtor4	66096	late endosomal/lysosomal adaptor, MAPK and MTOR activator 4	-0.639032	9.36613e-05	0.000752425
ENSMUSG00000036940	Kdm1a	99982	lysine (K)-specific demethylase 1A	-0.638292	1.20826e-05	0.000140138
ENSMUSG00000030127	Cops7a	26894	COP9 signalosome subunit 7A	-0.637796	4.81602e-07	9.31393e-06
ENSMUSG00000025439	Clns1a	12729	chloride channel, nucleotide-sensitive, 1A	-0.637773	1.48342e-07	3.40115e-06
ENSMUSG00000021591	Glrx	93692	glutaredoxin	-0.637743	8.40788e-05	0.000686936
ENSMUSG00000068391	Chrac1	93696	chromatin accessibility complex 1	-0.637556	0.00863124	0.0304933
ENSMUSG00000028969	Cdk5	12568	cyclin-dependent kinase 5	-0.637327	2.48036e-05	0.000251417
ENSMUSG00000032297	Celf6	76183	CUGBP, Elav-like family member 6	-0.637089	0.000448838	0.00275701
ENSMUSG00000026942	Traf2	22030	TNF receptor-associated factor 2	-0.636952	0.0137482	0.044173
ENSMUSG00000039737	Prkrip1	66801	Prkr interacting protein 1 (IL11 inducible)	-0.636801	0.00802582	0.0287411
ENSMUSG00000068856	Sf3b4	107701	splicing factor 3b, subunit 4	-0.636432	0.0068468	0.0253956
ENSMUSG00000031641	Cbr4	234309	carbonyl reductase 4	-0.636424	0.00652756	0.0244627
ENSMUSG00000024952	Rps6ka4	56613	ribosomal protein S6 kinase, polypeptide 4	-0.636245	0.00435529	0.0176714
ENSMUSG00000024151	Msh2	17685	mutS homolog 2	-0.636198	0.00312276	0.0135505
ENSMUSG00000032300	1700017B05Rik	74211	RIKEN cDNA 1700017B05 gene	-0.635872	0.0119799	0.0396562
ENSMUSG00000026750	Psmb7	19177	proteasome (prosome, macropain) subunit, beta type 7	-0.635702	0.012756	0.0416997
ENSMUSG00000025503	Taldo1	21351	transaldolase 1	-0.635534	0.000714152	0.00406435
ENSMUSG00000021811	Dnajc9	108671	DnaJ heat shock protein family (Hsp40) member C9	-0.635293	5.67738e-05	0.000498506
ENSMUSG00000038530	Rgs4	19736	regulator of G-protein signaling 4	-0.634974	2.03592e-05	0.000215276
ENSMUSG00000024099	Ndufv2	72900	NADH:ubiquinone oxidoreductase core subunit V2	-0.63497	1.14813e-07	2.73307e-06
ENSMUSG00000030595	Nfkbib	18036	nuclear factor of kappa light polypeptide gene enhancer in B cells inhibitor, beta	-0.634812	0.00757212	0.0274379
ENSMUSG00000037296	Lsm1	67207	LSM1 homolog, mRNA degradation associated	-0.634504	0.00822812	0.0293343
ENSMUSG00000038683	Pak1ip1	68083	PAK1 interacting protein 1	-0.63406	0.000128433	0.000977115
ENSMUSG00000030204	Ddx47	67755	DEAD box helicase 47	-0.633605	6.30651e-06	8.1154e-05
ENSMUSG00000035620	Ric8b	237422	RIC8 guanine nucleotide exchange factor B	-0.633029	0.00104428	0.00556675
ENSMUSG00000023036	Pcdhgc4	93707	protocadherin gamma subfamily C, 4	-0.632883	0.0145064	0.0460774
ENSMUSG00000001229	Dpp9	224897	dipeptidylpeptidase 9	-0.632863	0.00485879	0.0192197
ENSMUSG00000026377	Nifk	67949	nucleolar protein interacting with the FHA domain of MKI67	-0.632775	1.4465e-05	0.000162499
ENSMUSG00000032261	Sh3bgrl2	212531	SH3 domain binding glutamic acid-rich protein like 2	-0.632472	3.83862e-05	0.000361411
ENSMUSG00000055839	Elob	67673	elongin B	-0.632364	0.00128671	0.00662918
ENSMUSG00000044475	Ascc1	69090	activating signal cointegrator 1 complex subunit 1	-0.632254	0.0104516	0.0355064
ENSMUSG00000020495	Smg8	74133	smg-8 homolog, nonsense mediated mRNA decay factor (C. elegans)	-0.632054	0.00283172	0.0125567
ENSMUSG00000068184	Ndufaf2	75597	NADH:ubiquinone oxidoreductase complex assembly factor 2	-0.631913	1.8635e-06	2.86009e-05
ENSMUSG00000020638	Cmpk2	22169	cytidine monophosphate (UMP-CMP) kinase 2, mitochondrial	-0.631768	0.00241043	0.0110501
ENSMUSG00000026447	Pik3c2b	240752	phosphatidylinositol-4-phosphate 3-kinase catalytic subunit type 2 beta	-0.631757	0.00169487	0.00830439
ENSMUSG00000015790	Surf1	20930	surfeit gene 1	-0.631614	7.64558e-05	0.000636248
ENSMUSG00000024535	Snx24	69226	sorting nexing 24	-0.630818	0.00166545	0.00818167
ENSMUSG00000027834	Serpini1	20713	serine (or cysteine) peptidase inhibitor, clade I, member 1	-0.630666	2.01264e-06	3.06104e-05
ENSMUSG00000037106	Fer1l6	631797	fer-1-like 6 (C. elegans)	-0.630593	0.0108141	0.0365053
ENSMUSG00000003528	Slc25a1	13358	solute carrier family 25 (mitochondrial carrier, citrate transporter), member 1	-0.630352	0.00320608	0.0138477
ENSMUSG00000034620	Rxylt1	216395	ribitol xylosyltransferase 1	-0.630043	0.001737	0.00847865
ENSMUSG00000030061	Uba3	22200	ubiquitin-like modifier activating enzyme 3	-0.6299	0.00010069	0.000800468
ENSMUSG00000053347	Zfp943	74670	zinc finger prtoein 943	-0.6293	0.00801033	0.0286978
ENSMUSG00000026610	Esrrg	26381	estrogen-related receptor gamma	-0.628876	0.00043644	0.00269662
ENSMUSG00000037376	Trmt6	66926	tRNA methyltransferase 6	-0.628811	0.000185253	0.0013271
ENSMUSG00000109324	Prmt1	15469	protein arginine N-methyltransferase 1	-0.628559	0.000442626	0.00272571
ENSMUSG00000029681	Bcl7b	12054	B cell CLL/lymphoma 7B	-0.628206	0.00113572	0.00598709
ENSMUSG00000027584	Oprl1	18389	opioid receptor-like 1	-0.627536	0.0144269	0.0458769
ENSMUSG00000039901	Armh3	71617	armadillo-like helical domain containing 3	-0.627451	0.00882614	0.0309929
ENSMUSG00000020176	Grb10	14783	growth factor receptor bound protein 10	-0.627262	0.000331733	0.00216089
ENSMUSG00000042724	Map3k9	338372	mitogen-activated protein kinase kinase kinase 9	-0.62707	0.0155986	0.0487736
ENSMUSG00000079184	Mphosph8	75339	M-phase phosphoprotein 8	-0.626889	2.90084e-05	0.000286101
ENSMUSG00000060279	Ap2a1	11771	adaptor-related protein complex 2, alpha 1 subunit	-0.626515	0.00602237	0.022935
ENSMUSG00000034341	Wbp2	22378	WW domain binding protein 2	-0.625759	1.80639e-09	7.76422e-08
ENSMUSG00000045031	Cetn4	207175	centrin 4	-0.625425	0.00683929	0.0253845
ENSMUSG00000031546	Gins4	109145	GINS complex subunit 4 (Sld5 homolog)	-0.62487	0.00821354	0.0292947
ENSMUSG00000076441	Ass1	11898	argininosuccinate synthetase 1	-0.62464	0.00176475	0.00859323
ENSMUSG00000021782	Dlg5	71228	discs large MAGUK scaffold protein 5	-0.624554	0.00112197	0.00592578
ENSMUSG00000030254	Rad18	58186	RAD18 E3 ubiquitin protein ligase	-0.624483	0.00132555	0.00678561
ENSMUSG00000001366	Fbxo9	71538	f-box protein 9	-0.624214	0.000593639	0.0034908
ENSMUSG00000017119	Nbr1	17966	NBR1, autophagy cargo receptor	-0.623776	5.54594e-08	1.46319e-06
ENSMUSG00000031299	Pdha1	18597	pyruvate dehydrogenase E1 alpha 1	-0.622518	0.000143278	0.00107019
ENSMUSG00000034390	Cmip	74440	c-Maf inducing protein	-0.62236	0.000706211	0.00403008
ENSMUSG00000028684	Urod	22275	uroporphyrinogen decarboxylase	-0.622357	0.0058148	0.022296
ENSMUSG00000036751	Cox6b1	110323	cytochrome c oxidase, subunit 6B1	-0.622353	5.86484e-07	1.09387e-05
ENSMUSG00000066979	Bub3	12237	BUB3 mitotic checkpoint protein	-0.620734	0.00030577	0.00202234
ENSMUSG00000021650	Ptcd2	68927	pentatricopeptide repeat domain 2	-0.62054	0.00103187	0.00550702
ENSMUSG00000038845	Phb	18673	prohibitin	-0.619445	0.000419717	0.00261347
ENSMUSG00000031672	Got2	14719	glutamatic-oxaloacetic transaminase 2, mitochondrial	-0.619294	2.39559e-05	0.000244446
ENSMUSG00000024855	Pacs1	107975	phosphofurin acidic cluster sorting protein 1	-0.619242	8.012e-06	9.90072e-05
ENSMUSG00000031167	Rbm3	19652	RNA binding motif (RNP1, RRM) protein 3	-0.618656	0.000321149	0.00210501
ENSMUSG00000051495	Irf2bp2	270110	interferon regulatory factor 2 binding protein 2	-0.618623	0.0059762	0.0227901
ENSMUSG00000004285	Atp6v1f	66144	ATPase, H+ transporting, lysosomal V1 subunit F	-0.618185	0.000161167	0.00117764
ENSMUSG00000034192	Lsm3	67678	LSM3 homolog, U6 small nuclear RNA and mRNA degradation associated	-0.618059	0.000725617	0.00411151
ENSMUSG00000029121	Crmp1	12933	collapsin response mediator protein 1	-0.61743	1.17484e-05	0.000137592
ENSMUSG00000034187	Nsf	18195	N-ethylmaleimide sensitive fusion protein	-0.617265	1.69954e-08	5.379e-07
ENSMUSG00000035898	Uba6	231380	ubiquitin-like modifier activating enzyme 6	-0.617246	0.000183878	0.0013195
ENSMUSG00000005510	Ndufs3	68349	NADH:ubiquinone oxidoreductase core subunit S3	-0.616793	2.13744e-05	0.000224091
ENSMUSG00000006095	Tbcb	66411	tubulin folding cofactor B	-0.616708	1.59803e-05	0.00017692
ENSMUSG00000034285	Nipsnap1	18082	nipsnap homolog 1	-0.616606	1.17909e-06	1.95422e-05
ENSMUSG00000034586	Hid1	217310	HID1 domain containing	-0.615639	0.000745246	0.0042043
ENSMUSG00000043439	Epop	103551	elongin BC and polycomb repressive complex 2 associated protein	-0.615299	0.0120158	0.0397284
ENSMUSG00000061518	Cox5b	12859	cytochrome c oxidase subunit 5B	-0.61496	4.0188e-08	1.11636e-06
ENSMUSG00000025487	Psmd13	23997	proteasome (prosome, macropain) 26S subunit, non-ATPase, 13	-0.614751	0.00384969	0.0159985
ENSMUSG00000028779	Pef1	67898	penta-EF hand domain containing 1	-0.614686	0.000181841	0.00130935
ENSMUSG00000015869	Prpsap1	67763	phosphoribosyl pyrophosphate synthetase-associated protein 1	-0.613241	0.000363896	0.00233066
ENSMUSG00000074797	Itpa	16434	inosine triphosphatase (nucleoside triphosphate pyrophosphatase)	-0.612924	0.000201186	0.00142364
ENSMUSG00000018451	6330403K07Rik	103712	RIKEN cDNA 6330403K07 gene	-0.612696	5.94034e-08	1.54781e-06
ENSMUSG00000001472	Tcf25	66855	transcription factor 25 (basic helix-loop-helix)	-0.612276	4.75702e-10	2.40997e-08
ENSMUSG00000051397	Tacstd2	56753	tumor-associated calcium signal transducer 2	-0.61206	0.0148255	0.0468568
ENSMUSG00000025173	Wdr45b	66840	WD repeat domain 45B	-0.611087	0.000877896	0.00482312
ENSMUSG00000042569	Dhrs7b	216820	dehydrogenase/reductase (SDR family) member 7B	-0.610886	0.00197729	0.00942705
ENSMUSG00000034566	Atp5h	71679	ATP synthase, H+ transporting, mitochondrial F0 complex, subunit D	-0.610774	3.95301e-06	5.50409e-05
ENSMUSG00000025776	Crispld1	83691	cysteine-rich secretory protein LCCL domain containing 1	-0.610439	0.00123668	0.00642427
ENSMUSG00000041559	Fmod	14264	fibromodulin	-0.610246	0.00886455	0.0311083
ENSMUSG00000032690	Oas2	246728	2'-5' oligoadenylate synthetase 2	-0.610239	0.00954679	0.0330402
ENSMUSG00000002068	Ccne1	12447	cyclin E1	-0.609956	0.00932492	0.0324058
ENSMUSG00000037710	Cisd1	52637	CDGSH iron sulfur domain 1	-0.609727	5.21879e-06	6.92788e-05
ENSMUSG00000036023	Parp2	11546	poly (ADP-ribose) polymerase family, member 2	-0.609337	0.00728006	0.0265918
ENSMUSG00000001305	Rrp15	67223	ribosomal RNA processing 15 homolog (S. cerevisiae)	-0.608151	0.0159826	0.0496496
ENSMUSG00000006932	Ctnnb1	12387	catenin (cadherin associated protein), beta 1	-0.607585	0.000758183	0.00426869
ENSMUSG00000025190	Got1	14718	glutamic-oxaloacetic transaminase 1, soluble	-0.607526	1.77615e-05	0.000193153
ENSMUSG00000040473	Cfap69	207686	cilia and flagella associated protein 69	-0.60725	0.00700356	0.0258401
ENSMUSG00000021962	Dcp1a	75901	decapping mRNA 1A	-0.60684	0.00575871	0.0221264
ENSMUSG00000025757	Hspa4l	18415	heat shock protein 4 like	-0.606797	0.00010424	0.00082208
ENSMUSG00000010914	Pdhx	27402	pyruvate dehydrogenase complex, component X	-0.606714	0.000102882	0.000813279
ENSMUSG00000073676	Hspe1	15528	heat shock protein 1 (chaperonin 10)	-0.606636	3.65605e-08	1.03093e-06
ENSMUSG00000016552	Foxred2	239554	FAD-dependent oxidoreductase domain containing 2	-0.606601	0.0133081	0.0431131
ENSMUSG00000055371	Stam2	56324	signal transducing adaptor molecule (SH3 domain and ITAM motif) 2	-0.606516	0.00450998	0.0181584
ENSMUSG00000041231	Ublcp1	79560	ubiquitin-like domain containing CTD phosphatase 1	-0.606395	0.0129595	0.0421678
ENSMUSG00000052557	Gan	209239	giant axonal neuropathy	-0.606308	0.00169143	0.00828993
ENSMUSG00000029911	Ssbp1	381760	single-stranded DNA binding protein 1	-0.605485	0.00473597	0.0188608
ENSMUSG00000051007	Gatd1	213350	glutamine amidotransferase like class 1 domain containing 1	-0.604578	0.00966767	0.0333885
ENSMUSG00000072966	Gprasp2	245607	G protein-coupled receptor associated sorting protein 2	-0.603379	9.17231e-06	0.000111059
ENSMUSG00000017144	Rnd3	74194	Rho family GTPase 3	-0.603217	0.0138159	0.0443363
ENSMUSG00000061613	U2af1	108121	U2 small nuclear ribonucleoprotein auxiliary factor (U2AF) 1	-0.602705	0.000361702	0.00232191
ENSMUSG00000013622	Atraid	381629	all-trans retinoic acid induced differentiation factor	-0.602482	0.00274737	0.0122603
ENSMUSG00000031104	Rab33a	19337	RAB33A, member RAS oncogene family	-0.602131	0.000435617	0.00269451
ENSMUSG00000054808	Actn4	60595	actinin alpha 4	-0.601627	0.00244574	0.0111693
ENSMUSG00000068749	Psma5	26442	proteasome subunit alpha 5	-0.601281	0.00215156	0.0100722
ENSMUSG00000016018	Mtrex	72198	Mtr4 exosome RNA helicase	-0.601165	8.26316e-05	0.000677418
ENSMUSG00000025208	Mrpl43	94067	mitochondrial ribosomal protein L43	-0.601111	0.00070178	0.00401161
ENSMUSG00000026260	Ndufa10	67273	NADH:ubiquinone oxidoreductase subunit A10	-0.601103	0.000130483	0.000989573
ENSMUSG00000029066	Mrpl20	66448	mitochondrial ribosomal protein L20	-0.600916	1.781e-05	0.000193481
ENSMUSG00000044715	Gskip	66787	GSK3B interacting protein	-0.600157	0.000946006	0.00513023
ENSMUSG00000018585	Atox1	11927	antioxidant 1 copper chaperone	-0.600122	0.00468046	0.0186796
ENSMUSG00000024078	Ttc27	74196	tetratricopeptide repeat domain 27	-0.599889	0.00499394	0.019651
ENSMUSG00000040265	Dnm3	103967	dynamin 3	-0.599528	5.05707e-07	9.70196e-06
ENSMUSG00000063889	Crem	12916	cAMP responsive element modulator	-0.599451	0.00627831	0.0237162
ENSMUSG00000030802	Bckdk	12041	branched chain ketoacid dehydrogenase kinase	-0.599105	0.00403745	0.0165941
ENSMUSG00000036437	Npy1r	18166	neuropeptide Y receptor Y1	-0.598638	2.36623e-05	0.000242039
ENSMUSG00000036104	Rab3gap1	226407	RAB3 GTPase activating protein subunit 1	-0.598403	7.25375e-05	0.000610754
ENSMUSG00000055817	Mta3	116871	metastasis associated 3	-0.598385	3.09723e-05	0.000302453
ENSMUSG00000028455	Stoml2	66592	stomatin (Epb7.2)-like 2	-0.598232	0.000202494	0.00143229
ENSMUSG00000032047	Acat1	110446	acetyl-Coenzyme A acetyltransferase 1	-0.597342	6.99645e-07	1.26597e-05
ENSMUSG00000059183	Mtfmt	69606	mitochondrial methionyl-tRNA formyltransferase	-0.597039	0.0157566	0.049127
ENSMUSG00000034613	Ppm1h	319468	protein phosphatase 1H (PP2C domain containing)	-0.596962	6.05035e-07	1.12302e-05
ENSMUSG00000031848	Lsm4	50783	LSM4 homolog, U6 small nuclear RNA and mRNA degradation associated	-0.596593	0.0108677	0.0366678
ENSMUSG00000035642	Aamdc	66273	adipogenesis associated Mth938 domain containing	-0.596384	0.0038679	0.0160543
ENSMUSG00000028790	Khdrbs1	20218	KH domain containing, RNA binding, signal transduction associated 1	-0.596121	0.000861131	0.00475095
ENSMUSG00000038290	Smg6	103677	Smg-6 homolog, nonsense mediated mRNA decay factor (C. elegans)	-0.595288	0.000373156	0.00237728
ENSMUSG00000024038	Ndufv3	78330	NADH:ubiquinone oxidoreductase core subunit V3	-0.595176	4.48905e-05	0.000412257
ENSMUSG00000045996	Polr2k	17749	polymerase (RNA) II (DNA directed) polypeptide K	-0.594765	0.0136248	0.0438486
ENSMUSG00000005716	Pvalb	19293	parvalbumin	-0.594725	0.000197171	0.00140112
ENSMUSG00000024067	Dpy30	66310	dpy-30, histone methyltransferase complex regulatory subunit	-0.594282	0.000103353	0.000816619
ENSMUSG00000027133	Nop10	66181	NOP10 ribonucleoprotein	-0.594244	3.1223e-05	0.00030437
ENSMUSG00000043445	Pgp	67078	phosphoglycolate phosphatase	-0.594059	0.000551443	0.00328404
ENSMUSG00000003531	Dgcr6	13353	DiGeorge syndrome critical region gene 6	-0.594031	0.0029351	0.012923
ENSMUSG00000021546	Hnrnpk	15387	heterogeneous nuclear ribonucleoprotein K	-0.593646	2.94024e-05	0.000289476
ENSMUSG00000022538	Lsg1	224092	large 60S subunit nuclear export GTPase 1	-0.593522	0.00243688	0.0111349
ENSMUSG00000040520	Manea	242362	mannosidase, endo-alpha	-0.59331	5.60006e-05	0.000492746
ENSMUSG00000032503	Arpp21	74100	cyclic AMP-regulated phosphoprotein, 21	-0.59254	7.10256e-05	0.000599999
ENSMUSG00000031770	Herpud1	64209	homocysteine-inducible, endoplasmic reticulum stress-inducible, ubiquitin-like domain member 1	-0.591228	0.00753527	0.0273338
ENSMUSG00000033585	Ndn	17984	necdin	-0.591227	1.48039e-07	3.39883e-06
ENSMUSG00000030035	Wbp1	22377	WW domain binding protein 1	-0.590213	0.00894137	0.0313255
ENSMUSG00000023018	Smarcd1	83797	SWI/SNF related, matrix associated, actin dependent regulator of chromatin, subfamily d, member 1	-0.589719	0.00486089	0.0192197
ENSMUSG00000073888	Ccl27a	20301	chemokine (C-C motif) ligand 27A	-0.589354	0.0147473	0.0466659
ENSMUSG00000004771	Rab11a	53869	RAB11A, member RAS oncogene family	-0.589119	5.89085e-05	0.000514027
ENSMUSG00000068882	Ssb	20823	Sjogren syndrome antigen B	-0.588789	0.00112478	0.00593878
ENSMUSG00000072915	Gm12258	108167848	predicted gene 12258	-0.588644	0.00661898	0.0247307
ENSMUSG00000069089	Cdk7	12572	cyclin-dependent kinase 7	-0.588388	0.00478148	0.0190043
ENSMUSG00000020477	Mrps24	64660	mitochondrial ribosomal protein S24	-0.588383	0.00338722	0.0144738
ENSMUSG00000026860	Sh3glb2	227700	SH3-domain GRB2-like endophilin B2	-0.588193	0.0159798	0.0496496
ENSMUSG00000033885	Pxk	218699	PX domain containing serine/threonine kinase	-0.587763	0.000301422	0.00199787
ENSMUSG00000029247	Paics	67054	phosphoribosylaminoimidazole carboxylase, phosphoribosylaminoribosylaminoimidazole, succinocarboxamide synthetase	-0.58714	4.03411e-06	5.61228e-05
ENSMUSG00000061360	Phf5a	68479	PHD finger protein 5A	-0.587033	0.000410097	0.00256784
ENSMUSG00000115987	Vps28	66914	vacuolar protein sorting 28	-0.587025	0.000669992	0.00386009
ENSMUSG00000023156	Rpp14	67053	ribonuclease P 14 subunit	-0.586773	0.000345183	0.00223724
ENSMUSG00000002102	Psmc3	19182	proteasome (prosome, macropain) 26S subunit, ATPase 3	-0.586473	2.60303e-05	0.000262112
ENSMUSG00000029642	Polr1d	20018	polymerase (RNA) I polypeptide D	-0.586381	0.000353041	0.00227992
ENSMUSG00000022898	Vps26c	13185	VPS26 endosomal protein sorting factor C	-0.586049	0.00370622	0.0155406
ENSMUSG00000028719	Cmpk1	66588	cytidine monophosphate (UMP-CMP) kinase 1	-0.585553	6.55828e-06	8.36256e-05
ENSMUSG00000016554	Eif3d	55944	eukaryotic translation initiation factor 3, subunit D	-0.585403	0.00729019	0.0266172
ENSMUSG00000055745	Rtl6	223732	retrotransposon Gag like 6	-0.585388	0.00432947	0.0175921
ENSMUSG00000024234	Mtpap	67440	mitochondrial poly(A) polymerase	-0.585359	7.74595e-05	0.000643174
ENSMUSG00000046727	Cystm1	66060	cysteine-rich transmembrane module containing 1	-0.585168	2.86227e-05	0.000282794
ENSMUSG00000025266	Gnl3l	237107	guanine nucleotide binding protein-like 3 (nucleolar)-like	-0.584864	1.13077e-06	1.88342e-05
ENSMUSG00000067148	Polr1c	20016	polymerase (RNA) I polypeptide C	-0.584772	0.00125434	0.00649629
ENSMUSG00000049866	Arl4c	320982	ADP-ribosylation factor-like 4C	-0.584359	4.50597e-05	0.000413359
ENSMUSG00000019878	Hsf2	15500	heat shock factor 2	-0.584326	0.00408992	0.0167933
ENSMUSG00000036782	Klhl13	67455	kelch-like 13	-0.584176	0.00109206	0.00578708
ENSMUSG00000026496	Parp1	11545	poly (ADP-ribose) polymerase family, member 1	-0.582987	0.000801147	0.00447609
ENSMUSG00000021486	Prelid1	66494	PRELI domain containing 1	-0.582666	0.00146806	0.00738688
ENSMUSG00000021700	Rab3c	67295	RAB3C, member RAS oncogene family	-0.582559	3.3063e-06	4.7492e-05
ENSMUSG00000029715	Pop7	74097	processing of precursor 7, ribonuclease P family, (S. cerevisiae)	-0.582527	0.0146533	0.0464297
ENSMUSG00000026965	Anapc2	99152	anaphase promoting complex subunit 2	-0.582128	0.00644747	0.0242191
ENSMUSG00000020658	Efr3b	668212	EFR3 homolog B	-0.582067	7.75154e-07	1.37273e-05
ENSMUSG00000071658	Gng3	14704	guanine nucleotide binding protein (G protein), gamma 3	-0.581549	3.14579e-06	4.5576e-05
ENSMUSG00000072437	Nanos1	332397	nanos C2HC-type zinc finger 1	-0.581144	0.00065531	0.00379685
ENSMUSG00000035443	Thyn1	77862	thymocyte nuclear protein 1	-0.580565	6.76205e-07	1.23123e-05
ENSMUSG00000033061	Resp18	19711	regulated endocrine-specific protein 18	-0.580108	0.00506543	0.0198947
